# Supplementary material for: A Comprehensive DNA Barcode Library for the Looper Moths (Lepidoptera: Geometridae) of British Columbia, Canada
Source: PubMed Central journal article supplement (PMC3065486; doi:10.1371/journal.pone.0018290), 2011-03-28
Supplement: pone.0018290.s002.pdf [file pone.0018290.s002.pdf]

| Species                         | Specimen ID        | BOLD ID     | GenBank Acc. | Country       | State/Province   | Institution Storing                                              |
|---------------------------------|--------------------|-------------|--------------|---------------|------------------|------------------------------------------------------------------|
| <i>Acasis vindata</i>           | 08-JDWBC-0276      | LBCG276-08  | HQ647388     | Canada        | British Columbia | Spencer Entomological Museum, UBC                                |
| <i>Acasis vindata</i>           | HLC-20192          | LBCA192-05  | HQ647384     | Canada        | British Columbia | Biodiversity Institute of Ontario                                |
| <i>Acasis vindata</i>           | NFRP-P-2007-100093 | GWNN102-07  | HQ647387     | Canada        | Alberta          | Northern Forestry Centre, Canadian Forest Service                |
| <i>Acasis vindata</i>           | NFRP-P-2007-100094 | GWNN103-07  | HQ647386     | Canada        | Alberta          | Northern Forestry Centre, Canadian Forest Service                |
| <i>Acasis vindata</i>           | UASM57989          | GWNS482-07  | HQ647385     | Canada        | Alberta          | Strickland Museum of Entomology, University of Alberta           |
| <i>Aethalura intertexta</i>     | 07-JDWBC-0044      | GWND036-07  | HQ647393     | Canada        | British Columbia | Royal British Columbia Museum                                    |
| <i>Aethalura intertexta</i>     | 07-JDWBC-0052      | GWND044-07  | HQ647392     | Canada        | British Columbia | Royal British Columbia Museum                                    |
| <i>Aethalura intertexta</i>     | 07-JDWBC-0053      | GWND045-07  | HQ647391     | Canada        | British Columbia | Royal British Columbia Museum                                    |
| <i>Aethalura intertexta</i>     | CNCLP00033095      | GWNC096-07  | HQ647390     | Canada        | Alberta          | Canadian National Collection of Insects, Arachnids and Nematodes |
| <i>Aethalura intertexta</i>     | CNCLP00033096      | GWNC097-07  | HQ647389     | Canada        | British Columbia | Canadian National Collection of Insects, Arachnids and Nematodes |
| <i>Aethalura intertexta</i>     | ENT996-003503      | GWNR076-07  | HQ647397     | Canada        | British Columbia | Royal British Columbia Museum                                    |
| <i>Aethalura intertexta</i>     | SEM-UBC-GEO-0082   | GWNU040-07  | HQ647398     | Canada        | British Columbia | Spencer Entomological Museum, UBC                                |
| <i>Aethalura intertexta</i>     | UASM41863          | GWNS074-07  | HQ647395     | Canada        | Alberta          | Strickland Museum of Entomology, University of Alberta           |
| <i>Aethalura intertexta</i>     | UASM58063          | GWNS073-07  | HQ647396     | Canada        | Alberta          | Strickland Museum of Entomology, University of Alberta           |
| <i>Aethalura intertexta</i>     | UASM58363          | GWNS075-07  | HQ647394     | Canada        | Alberta          | Strickland Museum of Entomology, University of Alberta           |
| <i>Alsophila pomitaria</i>      | CNCLP00033306      | GWNC307-07  | HQ647399     | Canada        | Alberta          | Canadian National Collection of Insects, Arachnids and Nematodes |
| <i>Anavitrinella addendaria</i> | 09-JDWGEO-468      | GNAU168-10  | HM392443     | United States | Nevada           | Smithsonian Institution                                          |
| <i>Anavitrinella addendaria</i> | 09-JDWGEO-470      | GNAU170-10  | HM392444     | United States | Nevada           | Smithsonian Institution                                          |
| <i>Anavitrinella addendaria</i> | 09-JDWGEO-471      | GNAU171-10  | HM392445     | United States | Texas            | Smithsonian Institution                                          |
| <i>Anavitrinella addendaria</i> | 09-JDWGEO-473      | GNAU173-10  | HM392446     | United States | Texas            | Smithsonian Institution                                          |
| <i>Anavitrinella addendaria</i> | WFMB-07-0025       | GWNW025-07  | HQ647400     | United States | Idaho            | University of Idaho, W. F. Barr Entomological Collection         |
| <i>Anavitrinella pampinaria</i> | Dun-08-059         | DUNLP059-08 | HQ647401     | Canada        | British Columbia | Pacific Forestry Centre, Canadian Forest Service                 |
| <i>Anavitrinella pampinaria</i> | ENT991-009990      | GWNR078-07  | HQ647405     | Canada        | British Columbia | Royal British Columbia Museum                                    |
| <i>Anavitrinella pampinaria</i> | ENT996-003594      | GWNR082-07  | HQ647404     | Canada        | British Columbia | Royal British Columbia Museum                                    |
| <i>Anavitrinella pampinaria</i> | UASM57120          | GWNS078-07  | HQ647403     | Canada        | Alberta          | Strickland Museum of Entomology, University of Alberta           |
| <i>Anavitrinella pampinaria</i> | UASM57250          | GWNS079-07  | HQ647402     | Canada        | Alberta          | Strickland Museum of Entomology, University of Alberta           |
| <i>Articlea multiferata</i>     | CNCLP00033408      | GWNC409-07  | HQ647406     | Canada        | Alberta          | Canadian National Collection of Insects, Arachnids and Nematodes |
| <i>Articlea multiferata</i>     | NFRP-P-2007-100070 | GWNN070-07  | HQ647408     | Canada        | Alberta          | Northern Forestry Centre, Canadian Forest Service                |
| <i>Articlea multiferata</i>     | UASM7017           | GWNS365-07  | HQ647407     | Canada        | Alberta          | Strickland Museum of Entomology, University of Alberta           |
| <i>Articlea multiferata</i>     | UASM95875          | GWNS546-07  | HQ647410     | Canada        | Alberta          | Strickland Museum of Entomology, University of Alberta           |
| <i>Articlea multiferata</i>     | UASM95877          | GWNS548-07  | HQ647409     | Canada        | Alberta          | Strickland Museum of Entomology, University of Alberta           |
| <i>Articlea vasilata</i>        | 07-JDWBC-0004      | GWND004-07  | HQ647414     | Canada        | British Columbia | Royal British Columbia Museum                                    |
| <i>Articlea vasilata</i>        | 07-JDWBC-0025      | GWND018-07  | HQ647413     | Canada        | British Columbia | Royal British Columbia Museum                                    |
| <i>Articlea vasilata</i>        | 07-JDWBC-0039      | GWND031-07  | HQ647412     | Canada        | British Columbia | Royal British Columbia Museum                                    |
| <i>Articlea vasilata</i>        | 07-JDWBC-0051      | GWND043-07  | HQ647411     | Canada        | British Columbia | Royal British Columbia Museum                                    |
| <i>Articlea vasilata</i>        | 08-JDWBC-0268      | LBCG268-08  | HQ647425     | Canada        | British Columbia | Spencer Entomological Museum, UBC                                |
| <i>Articlea vasilata</i>        | 08-JDWBC-0274      | LBCG274-08  | HQ647426     | Canada        | British Columbia | Spencer Entomological Museum, UBC                                |
| <i>Articlea vasilata</i>        | 08-JDWBC-0285      | LBCG285-08  | HQ647427     | Canada        | British Columbia | Spencer Entomological Museum, UBC                                |
| <i>Articlea vasilata</i>        | 08-JDWBC-0287      | LBCG287-08  | HQ647428     | Canada        | British Columbia | Spencer Entomological Museum, UBC                                |
| <i>Articlea vasilata</i>        | 08-JDWBC-0291      | LBCG291-08  | HQ647429     | Canada        | British Columbia | Spencer Entomological Museum, UBC                                |
| <i>Articlea vasilata</i>        | 08-JDWBC-0294      | LBCG294-08  | HQ647430     | Canada        | British Columbia | Spencer Entomological Museum, UBC                                |
| <i>Articlea vasilata</i>        | 08-JDWBC-0298      | LBCG298-08  | HQ647423     | Canada        | British Columbia | Spencer Entomological Museum, UBC                                |
| <i>Articlea vasilata</i>        | 08-JDWBC-0302      | LBCG302-08  | HQ647424     | Canada        | British Columbia | Spencer Entomological Museum, UBC                                |
| <i>Articlea vasilata</i>        | 08-JDWBC-0303      | LBCG303-08  | HQ647431     | Canada        | British Columbia | Spencer Entomological Museum, UBC                                |
| <i>Articlea vasilata</i>        | 08-JDWBC-0326      | LBCG326-08  | HQ647422     | Canada        | British Columbia | Spencer Entomological Museum, UBC                                |
| <i>Articlea vasilata</i>        | 08-JDWBC-0327      | LBCG327-08  | HQ647421     | Canada        | British Columbia | Spencer Entomological Museum, UBC                                |
| <i>Articlea vasilata</i>        | ENT002-001713      | GWNR420-07  | HQ647419     | Canada        | British Columbia | Royal British Columbia Museum                                    |
| <i>Articlea vasilata</i>        | ENT996-004604      | GWNR419-07  | HQ647420     | United States | Washington       | Royal British Columbia Museum                                    |
| <i>Articlea vasilata</i>        | UASM28798          | GWNS364-07  | HQ647417     | Canada        | Alberta          | Strickland Museum of Entomology, University of Alberta           |
| <i>Articlea vasilata</i>        | UASM59734          | GWNS362-07  | HQ647415     | Canada        | British Columbia | Strickland Museum of Entomology, University of Alberta           |
| <i>Articlea vasilata</i>        | UASM59735          | GWNS361-07  | HQ647416     | Canada        | British Columbia | Strickland Museum of Entomology, University of Alberta           |
| <i>Articlea vasilata</i>        | UASM7016           | GWNS363-07  | HQ647418     | Canada        | Alberta          | Strickland Museum of Entomology, University of Alberta           |
| <i>Apocera plagjata</i>         | 08-JDWBC-0024      | LBCG024-08  | HQ647442     | Canada        | British Columbia | Spencer Entomological Museum, UBC                                |
| <i>Apocera plagjata</i>         | 08-JDWBC-0025      | LBCG025-08  | HQ647441     | Canada        | British Columbia | Spencer Entomological Museum, UBC                                |
| <i>Apocera plagjata</i>         | 08-JDWBC-0026      | LBCG026-08  | HQ647440     | Canada        | British Columbia | Spencer Entomological Museum, UBC                                |
| <i>Apocera plagjata</i>         | CNCLP00033398      | GWNC399-07  | HQ647433     | Canada        | British Columbia | Canadian National Collection of Insects, Arachnids and Nematodes |
| <i>Apocera plagjata</i>         | CNCLP00033399      | GWNC400-07  | HQ647432     | Canada        | British Columbia | Canadian National Collection of Insects, Arachnids and Nematodes |
| <i>Apocera plagjata</i>         | CNCLP00035464      | GWNC698-07  | HQ647434     | Canada        | British Columbia | Canadian National Collection of Insects, Arachnids and Nematodes |
| <i>Apocera plagjata</i>         | ENT007-000946      | GWNR649-07  | HQ647444     | Canada        | British Columbia | Royal British Columbia Museum                                    |
| <i>Apocera plagjata</i>         | ENT007-000947      | GWNR650-07  | HQ647443     | United States | Washington       | Royal British Columbia Museum                                    |
| <i>Apocera plagjata</i>         | JD1779_UASM        | GWNS596-07  | HQ647436     | Canada        | British Columbia | Strickland Museum of Entomology, University of Alberta           |
| <i>Apocera plagjata</i>         | JECW-07-0175       | GWNJ175-07  | HQ647435     | United States | Idaho            | James Entomological Collection, Washington State University      |
| <i>Apocera plagjata</i>         | JECW-07-0176       | GWNJ176-07  | HQ647439     | United States | Washington       | James Entomological Collection, Washington State University      |
| <i>Apocera plagjata</i>         | PFC-2007-0227      | GWNP020-07  | HQ647437     | Canada        | British Columbia | Pacific Forestry Centre, Canadian Forest Service                 |
| <i>Apocera plagjata</i>         | WFMB-07-0090       | GWNW090-07  | HQ647438     | United States | Idaho            | University of Idaho, W. F. Barr Entomological Collection         |
| <i>Apodrepanulatrix litaria</i> | ENT996-003737      | GWNR164-07  | HQ647447     | Canada        | British Columbia | Royal British Columbia Museum                                    |
| <i>Apodrepanulatrix litaria</i> | ENT996-007425      | GWNR337-07  | HQ647446     | Canada        | British Columbia | Royal British Columbia Museum                                    |
| <i>Apodrepanulatrix litaria</i> | ENT996-007426      | GWNR338-07  | HQ647445     | Canada        | British Columbia | Royal British Columbia Museum                                    |
| <i>Archiearis infans</i>        | CGWC-3957          | LOWCE197-06 | HQ647449     | Canada        | British Columbia | Biodiversity Institute of Ontario                                |
| <i>Archiearis infans</i>        | CGWC-3960          | LOWCE200-06 | HQ647448     | Canada        | British Columbia | Biodiversity Institute of Ontario                                |
| <i>Archiearis infans</i>        | ENT006-000367      | GWNR655-07  | HQ647452     | Canada        | British Columbia | Royal British Columbia Museum                                    |
| <i>Archiearis infans</i>        | UASM24822          | GWNS002-07  | HQ647450     | Canada        | Alberta          | Strickland Museum of Entomology, University of Alberta           |
| <i>Archiearis infans</i>        | UASM59113          | GWNS001-07  | HQ647451     | Canada        | Alberta          | Strickland Museum of Entomology, University of Alberta           |
| <i>Aspitates aberrata</i>       | CBCC1026           | GWNS598-07  | HQ647460     | Canada        | Alberta          | Strickland Museum of Entomology, University of Alberta           |
| <i>Aspitates aberrata</i>       | ENT002-001591      | GWNR183-07  | HQ647461     | Canada        | British Columbia | Royal British Columbia Museum                                    |
| <i>Aspitates aberrata</i>       | ENT002-001592      | GWNR182-07  | HQ647462     | Canada        | British Columbia | Royal British Columbia Museum                                    |
| <i>Aspitates aberrata</i>       | ENT002-001598      | GWNR181-07  | HQ647463     | Canada        | British Columbia | Royal British Columbia Museum                                    |
| <i>Aspitates aberrata</i>       | ENT996-003806      | GWNR180-07  | HQ647464     | Canada        | Yukon Territory  | Royal British Columbia Museum                                    |
| <i>Aspitates aberrata</i>       | ENT996-003814      | GWNR179-07  | HQ647465     | Canada        | Yukon Territory  | Royal British Columbia Museum                                    |
| <i>Aspitates aberrata</i>       | UASM41548          | GWNS601-07  | HQ647457     | Canada        | Alberta          | Strickland Museum of Entomology, University of Alberta           |
| <i>Aspitates aberrata</i>       | UASM41549          | GWNS600-07  | HQ647458     | Canada        | Alberta          | Strickland Museum of Entomology, University of Alberta           |
| <i>Aspitates aberrata</i>       | UASM41550          | GWNS111-07  | HQ647453     | Canada        | Alberta          | Strickland Museum of Entomology, University of Alberta           |
| <i>Aspitates aberrata</i>       | UASM41850          | GWNS602-07  | HQ647456     | Canada        | Alberta          | Strickland Museum of Entomology, University of Alberta           |
| <i>Aspitates aberrata</i>       | UASM58225          | GWNS599-07  | HQ647459     | Canada        | Alberta          | Strickland Museum of Entomology, University of Alberta           |
| <i>Aspitates aberrata</i>       | UASM58226          | GWNS604-07  | HQ647455     | Canada        | Alberta          | Strickland Museum of Entomology, University of Alberta           |
| <i>Aspitates aberrata</i>       | UASM58227          | GWNS110-07  | HQ647454     | Canada        | Alberta          | Strickland Museum of Entomology, University of Alberta           |
| <i>Aspitates forbesi</i>        | CNCLP00033155      | GWNC156-07  | HQ647466     | Canada        | Yukon Territory  | Canadian National Collection of Insects, Arachnids and Nematodes |
| <i>Aspitates orciferaria</i>    | CNCLP00033156      | GWNC157-07  | HQ647467     | Canada        | Yukon Territory  | Canadian National Collection of Insects, Arachnids and Nematodes |
| <i>Aspitates taylora</i>        | CNCLP00033159      | GWNC160-07  | HQ647468     | Canada        | Yukon Territory  | Canadian National Collection of Insects, Arachnids and Nematodes |
| <i>Aspitates taylora</i>        | UASM53010          | GWNS113-07  | HQ647471     | Canada        | Alberta          | Strickland Museum of Entomology, University of Alberta           |
| <i>Aspitates taylora</i>        | UASM78370          | GWNS114-07  | HQ647470     | Canada        | Alberta          | Strickland Museum of Entomology, University of Alberta           |
| <i>Aspitates taylora</i>        | UASM78373          | GWNS115-07  | HQ647469     | Canada        | Alberta          | Strickland Museum of Entomology, University of Alberta           |
| <i>Besma quercivoraria</i>      | CNCLP00033207      | GWNC208-07  | HQ647473     | Canada        | British Columbia | Canadian National Collection of Insects, Arachnids and Nematodes |
| <i>Besma quercivoraria</i>      | HLC-20103          | LBCA103-05  | HQ647472     | Canada        | British Columbia | Biodiversity Institute of Ontario                                |
| <i>Besma quercivoraria</i>      | NFRP-P-2007-100033 | GWNN033-07  | HQ647474     | Canada        | Alberta          | Northern Forestry Centre, Canadian Forest Service                |
| <i>Besma quercivoraria</i>      | UASM7115           | GWNS200-07  | HQ647475     | Canada        | Alberta          | Strickland Museum of Entomology, University of Alberta           |
| <i>Besma quercivoraria</i>      | UASM78416          | GWNS199-07  | HQ647476     | Canada        | Alberta          | Strickland Museum of Entomology, University of Alberta           |
| <i>Biston betularia</i>         | 08-JDWBC-0023      | LBCG023-08  | HQ647491     | Canada        | British Columbia | Spencer Entomological Museum, UBC                                |
| <i>Biston betularia</i>         | 08-JDWBC-2919      | LBCG2919-09 | HQ647492     | Canada        | British Columbia | Spencer Entomological Museum, UBC                                |
| <i>Biston betularia</i>         | CNCLP00034190      | GWNC628-07  | HQ647479     | Canada        | British Columbia | Canadian National Collection of Insects, Arachnids and Nematodes |
| <i>Biston betularia</i>         | CNCLP00035404      | GWNC640-07  | HQ647478     | Canada        | British Columbia | Canadian National Collection of Insects, Arachnids and Nematodes |
| <i>Biston betularia</i>         | CNCLP00035406      | GWNC642-07  | HQ647477     | Canada        | British Columbia | Canadian National Collection of Insects, Arachnids and Nematodes |
| <i>Biston betularia</i>         | CNCLP00035407      | GWNC643-07  | HQ647481     | Canada        | British Columbia | Canadian National Collection of Insects, Arachnids and Nematodes |
| <i>Biston betularia</i>         | CNCLP00035427      | GWNC661-07  | HQ647480     | Canada        | British Columbia | Canadian National Collection of Insects, Arachnids and Nematodes |
| <i>Biston betularia</i>         | ENT002-001549      | GWNR128-07  | HQ647486     | Canada        | British Columbia | Royal British Columbia Museum                                    |
| <i>Biston betularia</i>         | ENT991-009890      | GWNR125-07  | HQ647488     | Canada        | British Columbia | Royal British Columbia Museum                                    |

|                                   |                     |             |          |               |                  |                                                                  |
|-----------------------------------|---------------------|-------------|----------|---------------|------------------|------------------------------------------------------------------|
| <i>Biston betularia</i>           | ENT996-003620       | GWNR123-07  | HQ647490 | Canada        | British Columbia | Royal British Columbia Museum                                    |
| <i>Biston betularia</i>           | ENT996-003625       | GWNR127-07  | HQ647487 | Canada        | British Columbia | Royal British Columbia Museum                                    |
| <i>Biston betularia</i>           | ENT996-003671       | GWNR124-07  | HQ647489 | Canada        | British Columbia | Royal British Columbia Museum                                    |
| <i>Biston betularia</i>           | NFRC-P-2007-100024  | GWNN024-07  | HQ647484 | Canada        | Alberta          | Northern Forestry Centre, Canadian Forest Service                |
| <i>Biston betularia</i>           | UASM43300           | GWNS092-07  | HQ647483 | Canada        | Alberta          | Strickland Museum of Entomology, University of Alberta           |
| <i>Biston betularia</i>           | UASM59800           | GWNS090-07  | HQ647482 | Canada        | British Columbia | Strickland Museum of Entomology, University of Alberta           |
| <i>Biston betularia</i>           | WFBM-07-0032        | GWNW032-07  | HQ647485 | United States | Idaho            | University of Idaho, W. F. Barr Entomological Collection         |
| <i>Cabera borealis</i>            | UASM53018           | GWNS531-07  | HQ647495 | Canada        | Alberta          | Strickland Museum of Entomology, University of Alberta           |
| <i>Cabera borealis</i>            | UASM53019           | GWNS528-07  | HQ647498 | Canada        | Alberta          | Strickland Museum of Entomology, University of Alberta           |
| <i>Cabera borealis</i>            | UASM53020           | GWNS529-07  | HQ647497 | Canada        | Alberta          | Strickland Museum of Entomology, University of Alberta           |
| <i>Cabera borealis</i>            | UASM53021           | GWNS530-07  | HQ647496 | Canada        | Alberta          | Strickland Museum of Entomology, University of Alberta           |
| <i>Cabera borealis</i>            | UASM53022           | GWNS532-07  | HQ647494 | Canada        | Alberta          | Strickland Museum of Entomology, University of Alberta           |
| <i>Cabera borealis</i>            | UASM53023           | GWNS533-07  | HQ647493 | Canada        | Alberta          | Strickland Museum of Entomology, University of Alberta           |
| <i>Cabera erythemaria</i>         | ENT002-001580       | GWNR151-07  | HQ647504 | Canada        | British Columbia | Royal British Columbia Museum                                    |
| <i>Cabera erythemaria</i>         | ENT002-001581       | GWNR152-07  | HQ647503 | Canada        | British Columbia | Royal British Columbia Museum                                    |
| <i>Cabera erythemaria</i>         | ENT996-003751       | GWNR150-07  | HQ647505 | United States | Washington       | Royal British Columbia Museum                                    |
| <i>Cabera erythemaria</i>         | UASM58283           | GWNS104-07  | HQ647500 | Canada        | Alberta          | Strickland Museum of Entomology, University of Alberta           |
| <i>Cabera erythemaria</i>         | UASM58784           | GWNS105-07  | HQ647499 | Canada        | Alberta          | Strickland Museum of Entomology, University of Alberta           |
| <i>Cabera erythemaria</i>         | UASM78475           | GWNS103-07  | HQ647501 | Canada        | Alberta          | Strickland Museum of Entomology, University of Alberta           |
| <i>Cabera erythemaria</i>         | WFBM-07-0036        | GWNW036-07  | HQ647502 | United States | Idaho            | University of Idaho, W. F. Barr Entomological Collection         |
| <i>Cabera exanthemata</i>         | ENT002-001577       | GWNR155-07  | HQ647506 | Canada        | British Columbia | Royal British Columbia Museum                                    |
| <i>Cabera exanthemata</i>         | ENT996-003649       | GWNR153-07  | HQ647507 | Canada        | British Columbia | Royal British Columbia Museum                                    |
| <i>Cabera variolaria</i>          | ENT002-001588       | GWNR158-07  | HQ647512 | Canada        | British Columbia | Royal British Columbia Museum                                    |
| <i>Cabera variolaria</i>          | HLC-20045           | LBCA045-05  | HQ647508 | Canada        | British Columbia | Biodiversity Institute of Ontario                                |
| <i>Cabera variolaria</i>          | UASM57238           | GWNS106-07  | HQ647510 | Canada        | Alberta          | Strickland Museum of Entomology, University of Alberta           |
| <i>Cabera variolaria</i>          | UASM58128           | GWNS107-07  | HQ647509 | Canada        | Alberta          | Strickland Museum of Entomology, University of Alberta           |
| <i>Cabera variolaria</i>          | UASM77909_duplicate | GWNS595-07  | HQ647511 | Canada        | Alberta          | Strickland Museum of Entomology, University of Alberta           |
| <i>Callizzia amorata</i>          | JECW-07-0222        | GWNJ222-07  | HQ647513 | Canada        | British Columbia | James Entomological Collection, Washington State University      |
| <i>Campaea perlata</i>            | 08-JDWBC-0759       | LBCG759-09  | HQ647528 | Canada        | British Columbia | Spencer Entomological Museum, UBC                                |
| <i>Campaea perlata</i>            | 08-JDWBC-0760       | LBCG760-09  | HQ647527 | Canada        | British Columbia | Spencer Entomological Museum, UBC                                |
| <i>Campaea perlata</i>            | 08-JDWBC-0950       | LBCG950-09  | HQ647526 | Canada        | British Columbia | Spencer Entomological Museum, UBC                                |
| <i>Campaea perlata</i>            | 08-JDWBC-0974       | LBCG974-09  | HQ647525 | Canada        | British Columbia | Spencer Entomological Museum, UBC                                |
| <i>Campaea perlata</i>            | 08-JDWBC-1000       | LBCG1000-09 | HQ647524 | Canada        | British Columbia | Spencer Entomological Museum, UBC                                |
| <i>Campaea perlata</i>            | 08-JDWBC-1010       | LBCG1010-09 | HQ647523 | Canada        | British Columbia | Spencer Entomological Museum, UBC                                |
| <i>Campaea perlata</i>            | 08-JDWBC-1842       | LBCG1842-09 | HQ647537 | Canada        | British Columbia | Spencer Entomological Museum, UBC                                |
| <i>Campaea perlata</i>            | 08-JDWBC-1843       | LBCG1843-09 | HQ647536 | Canada        | British Columbia | Spencer Entomological Museum, UBC                                |
| <i>Campaea perlata</i>            | CBCC1005            | GWNS146-07  | HQ647519 | Canada        | Alberta          | Strickland Museum of Entomology, University of Alberta           |
| <i>Campaea perlata</i>            | CBCC1215            | GWNS551-07  | HQ647522 | Canada        | Alberta          | Strickland Museum of Entomology, University of Alberta           |
| <i>Campaea perlata</i>            | CNCLPE00033177      | GWNC178-07  | HQ647514 | Canada        | Yukon Territory  | Canadian National Collection of Insects, Arachnids and Nematodes |
| <i>Campaea perlata</i>            | CNCLPE00033178      | GWNC179-07  | HQ647515 | United States | Alaska           | Canadian National Collection of Insects, Arachnids and Nematodes |
| <i>Campaea perlata</i>            | ENT002-001606       | GWNR235-07  | HQ647530 | Canada        | British Columbia | Royal British Columbia Museum                                    |
| <i>Campaea perlata</i>            | ENT002-001608       | GWNR236-07  | HQ647529 | Canada        | British Columbia | Royal British Columbia Museum                                    |
| <i>Campaea perlata</i>            | ENT987-000522       | GWNR229-07  | HQ647535 | Canada        | British Columbia | Royal British Columbia Museum                                    |
| <i>Campaea perlata</i>            | ENT991-010357       | GWNR230-07  | HQ647534 | Canada        | British Columbia | Royal British Columbia Museum                                    |
| <i>Campaea perlata</i>            | ENT996-003908       | GWNR231-07  | HQ647533 | Canada        | British Columbia | Royal British Columbia Museum                                    |
| <i>Campaea perlata</i>            | ENT996-003929       | GWNR234-07  | HQ647531 | United States | Washington       | Royal British Columbia Museum                                    |
| <i>Campaea perlata</i>            | ENT996-003930       | GWNR232-07  | HQ647532 | United States | Washington       | Royal British Columbia Museum                                    |
| <i>Campaea perlata</i>            | UASM2060            | GWNS147-07  | HQ647518 | Canada        | Alberta          | Strickland Museum of Entomology, University of Alberta           |
| <i>Campaea perlata</i>            | UASM59737           | GWNS149-07  | HQ647516 | Canada        | British Columbia | Strickland Museum of Entomology, University of Alberta           |
| <i>Campaea perlata</i>            | UASM78393           | GWNS148-07  | HQ647517 | Canada        | Alberta          | Strickland Museum of Entomology, University of Alberta           |
| <i>Campaea perlata</i>            | WFBM-07-0052        | GWNW052-07  | HQ647521 | United States | Idaho            | University of Idaho, W. F. Barr Entomological Collection         |
| <i>Campaea perlata</i>            | WFBM-07-0053        | GWNW053-07  | HQ647520 | United States | Idaho            | University of Idaho, W. F. Barr Entomological Collection         |
| <i>Caripeta aequalitaria</i>      | 08-JDWBC-3438       | LBCG3438-09 | HQ647549 | Canada        | British Columbia | Spencer Entomological Museum, UBC                                |
| <i>Caripeta aequalitaria</i>      | 08-JDWBC-3442       | LBCG3442-09 | HQ647548 | Canada        | British Columbia | Spencer Entomological Museum, UBC                                |
| <i>Caripeta aequalitaria</i>      | 08-JDWBC-3704       | LBCG3704-09 | HQ647547 | Canada        | British Columbia | Royal British Columbia Museum                                    |
| <i>Caripeta aequalitaria</i>      | 08-JDWBC-3706       | LBCG3706-09 | HQ647546 | Canada        | British Columbia | Royal British Columbia Museum                                    |
| <i>Caripeta aequalitaria</i>      | 08-JDWBC-3708       | LBCG3708-09 | HQ647545 | Canada        | British Columbia | Royal British Columbia Museum                                    |
| <i>Caripeta aequalitaria</i>      | 08-JDWBC-3709       | LBCG3709-09 | HQ647544 | Canada        | British Columbia | Royal British Columbia Museum                                    |
| <i>Caripeta aequalitaria</i>      | 08-JDWBC-3719       | LBCG3719-09 | HQ647543 | Canada        | British Columbia | Royal British Columbia Museum                                    |
| <i>Caripeta aequalitaria</i>      | Dun-08-060          | DUNLP060-08 | HQ647538 | Canada        | British Columbia | Pacific Forestry Centre, Canadian Forest Service                 |
| <i>Caripeta aequalitaria</i>      | ENT996-004053       | GWNR274-07  | HQ647540 | Canada        | British Columbia | Royal British Columbia Museum                                    |
| <i>Caripeta aequalitaria</i>      | ENT996-004056       | GWNR273-07  | HQ647541 | United States | Idaho            | Royal British Columbia Museum                                    |
| <i>Caripeta aequalitaria</i>      | ENT996-004069       | GWNR272-07  | HQ647542 | Canada        | British Columbia | Royal British Columbia Museum                                    |
| <i>Caripeta aequalitaria</i>      | JECW-07-0085        | GWNJ085-07  | HQ647539 | United States | Washington       | James Entomological Collection, Washington State University      |
| <i>Caripeta angustiorata</i>      | 08-JDWBC-3439       | LBCG3439-09 | HQ647557 | Canada        | British Columbia | Spencer Entomological Museum, UBC                                |
| <i>Caripeta angustiorata</i>      | 08-JDWBC-3443       | LBCG3443-09 | HQ647556 | Canada        | British Columbia | Spencer Entomological Museum, UBC                                |
| <i>Caripeta angustiorata</i>      | 08-JDWBC-3445       | LBCG3445-09 | HQ647555 | Canada        | British Columbia | Spencer Entomological Museum, UBC                                |
| <i>Caripeta angustiorata</i>      | 08-JDWBC-3681       | LBCG3681-09 | HQ647554 | Canada        | Alberta          | Strickland Museum of Entomology, University of Alberta           |
| <i>Caripeta angustiorata</i>      | Dun-08-061          | DUNLP061-08 | HQ647550 | Canada        | British Columbia | Pacific Forestry Centre, Canadian Forest Service                 |
| <i>Caripeta angustiorata</i>      | ENT996-004070       | GWNR275-07  | HQ647551 | Canada        | British Columbia | Royal British Columbia Museum                                    |
| <i>Caripeta angustiorata</i>      | UASM24795           | GWNS198-07  | HQ647552 | Canada        | Alberta          | Strickland Museum of Entomology, University of Alberta           |
| <i>Caripeta angustiorata</i>      | UASM43308           | GWNS197-07  | HQ647553 | Canada        | Alberta          | Strickland Museum of Entomology, University of Alberta           |
| <i>Caripeta divisata</i>          | 08-JDWBC-0019       | LBCG019-08  | HQ647563 | Canada        | British Columbia | Spencer Entomological Museum, UBC                                |
| <i>Caripeta divisata</i>          | 08-JDWBC-3440       | LBCG3440-09 | HQ647565 | Canada        | British Columbia | Spencer Entomological Museum, UBC                                |
| <i>Caripeta divisata</i>          | 08-JDWBC-3444       | LBCG3444-09 | HQ647564 | Canada        | British Columbia | Spencer Entomological Museum, UBC                                |
| <i>Caripeta divisata</i>          | Dun-08-062          | DUNLP062-08 | HQ647558 | Canada        | British Columbia | Pacific Forestry Centre, Canadian Forest Service                 |
| <i>Caripeta divisata</i>          | ENT996-003994       | GWNR276-07  | HQ647562 | Canada        | British Columbia | Royal British Columbia Museum                                    |
| <i>Caripeta divisata</i>          | ENT996-003995       | GWNR278-07  | HQ647561 | Canada        | British Columbia | Royal British Columbia Museum                                    |
| <i>Caripeta divisata</i>          | UASM43303           | GWNS196-07  | HQ647559 | Canada        | Alberta          | Strickland Museum of Entomology, University of Alberta           |
| <i>Caripeta divisata</i>          | UASM78434           | GWNS195-07  | HQ647560 | Canada        | Alberta          | Strickland Museum of Entomology, University of Alberta           |
| <i>Caripeta sp.</i>               | 08-JDWBC-0366       | LBCG366-08  | HQ647567 | Canada        | British Columbia | Spencer Entomological Museum, UBC                                |
| <i>Caripeta sp.</i>               | 08-JDWBC-0367       | LBCG367-08  | HQ647566 | Canada        | British Columbia | Spencer Entomological Museum, UBC                                |
| <i>Caripeta sp.</i>               | 08-JDWBC-1302       | LBCG1302-09 | HQ647568 | Canada        | British Columbia | Spencer Entomological Museum, UBC                                |
| <i>Carsia sororiata</i>           | CNCLPE00033401      | GWNC402-07  | HQ647570 | Canada        | Alberta          | Canadian National Collection of Insects, Arachnids and Nematodes |
| <i>Carsia sororiata</i>           | CNCLPE00033402      | GWNC402-07  | HQ647569 | United States | Alaska           | Canadian National Collection of Insects, Arachnids and Nematodes |
| <i>Ceratodalia gueneata</i>       | CNCLPE00033433      | GWNC434-07  | HQ647571 | Canada        | British Columbia | Canadian National Collection of Insects, Arachnids and Nematodes |
| <i>Ceratodalia gueneata</i>       | ENT987-000018       | GWNR423-07  | HQ647574 | Canada        | British Columbia | Royal British Columbia Museum                                    |
| <i>Ceratodalia gueneata</i>       | ENT996-004465       | GWNR425-07  | HQ647573 | United States | Washington       | Royal British Columbia Museum                                    |
| <i>Ceratodalia gueneata</i>       | ENT996-004479       | GWNR422-07  | HQ647575 | Canada        | British Columbia | Royal British Columbia Museum                                    |
| <i>Ceratodalia gueneata</i>       | FFC-2007-0292       | GWNP085-07  | HQ647572 | Canada        | British Columbia | Pacific Forestry Centre, Canadian Forest Service                 |
| <i>Chlorochlamys triangularis</i> | 08-JDWBC-2597       | LBCG2597-09 | HQ647580 | Canada        | British Columbia | Spencer Entomological Museum, UBC                                |
| <i>Chlorochlamys triangularis</i> | ENT996-007618       | GWNR358-07  | HQ647578 | Canada        | British Columbia | Royal British Columbia Museum                                    |
| <i>Chlorochlamys triangularis</i> | ENT996-007620       | GWNR359-07  | HQ647577 | Canada        | British Columbia | Royal British Columbia Museum                                    |
| <i>Chlorochlamys triangularis</i> | ENT996-007623       | GWNR357-07  | HQ647579 | Canada        | British Columbia | Royal British Columbia Museum                                    |
| <i>Chlorochlamys triangularis</i> | JECW-07-0126        | GWNJ126-07  | HQ647576 | United States | Washington       | James Entomological Collection, Washington State University      |
| <i>Chlorosea banksaria</i>        | CNCLPE00033241      | GWNC242-07  | HQ647581 | Canada        | British Columbia | Canadian National Collection of Insects, Arachnids and Nematodes |
| <i>Chlorosea banksaria</i>        | JECW-07-0116        | GWNJ116-07  | HQ647583 | United States | Washington       | James Entomological Collection, Washington State University      |
| <i>Chlorosea banksaria</i>        | JECW-07-0117        | GWNJ117-07  | HQ647582 | United States | Washington       | James Entomological Collection, Washington State University      |
| <i>Chlorosea nevadaria</i>        | CNCLPE00033238      | GWNC239-07  | HQ647584 | Canada        | British Columbia | Canadian National Collection of Insects, Arachnids and Nematodes |
| <i>Chlorosea nevadaria</i>        | ENT996-004163       | GWNR348-07  | HQ647586 | Canada        | British Columbia | Royal British Columbia Museum                                    |
| <i>Chlorosea nevadaria</i>        | ENT996-004164       | GWNR346-07  | HQ647587 | Canada        | British Columbia | Royal British Columbia Museum                                    |
| <i>Chlorosea nevadaria</i>        | ENT996-004166       | GWNR345-07  | HQ647588 | United States | Washington       | Royal British Columbia Museum                                    |
| <i>Chlorosea nevadaria</i>        | WFBM-07-0074        | GWNW074-07  | HQ647585 | United States | Idaho            | University of Idaho, W. F. Barr Entomological Collection         |
| <i>Cladara atrotriturata</i>      | 08-JDWBC-0290       | LBCG290-08  | HQ647591 | Canada        | British Columbia | Spencer Entomological Museum, UBC                                |
| <i>Cladara atrotriturata</i>      | ENT991-010173       | GWNR612-07  | HQ647593 | Canada        | British Columbia | Royal British Columbia Museum                                    |
| <i>Cladara atrotriturata</i>      | ENT996-005672       | GWNR613-07  | HQ647592 | Canada        | British Columbia | Royal British Columbia Museum                                    |
| <i>Cladara atrotriturata</i>      | UASM24900           | GWNS479-07  | HQ647590 | Canada        | Alberta          | Strickland Museum of Entomology, University of Alberta           |

|                                     |                |             |          |               |                  |                                                                  |
|-------------------------------------|----------------|-------------|----------|---------------|------------------|------------------------------------------------------------------|
| <i>Cladara atroliturata</i>         | UASM59112      | GWNS481-07  | HQ647589 | Canada        | Alberta          | Strickland Museum of Entomology, University of Alberta           |
| <i>Cladara limitaria</i>            | 08-JDWBC-0270  | LBCG270-08  | HQ647598 | Canada        | British Columbia | Spencer Entomological Museum, UBC                                |
| <i>Cladara limitaria</i>            | 08-JDWBC-0275  | LBCG275-08  | HQ647599 | Canada        | British Columbia | Spencer Entomological Museum, UBC                                |
| <i>Cladara limitaria</i>            | 08-JDWBC-0280  | LBCG280-08  | HQ647600 | Canada        | British Columbia | Spencer Entomological Museum, UBC                                |
| <i>Cladara limitaria</i>            | 08-JDWBC-0289  | LBCG289-08  | HQ647601 | Canada        | British Columbia | Spencer Entomological Museum, UBC                                |
| <i>Cladara limitaria</i>            | 08-JDWBC-0300  | LBCG300-08  | HQ647596 | Canada        | British Columbia | Spencer Entomological Museum, UBC                                |
| <i>Cladara limitaria</i>            | 08-JDWBC-0301  | LBCG301-08  | HQ647597 | Canada        | British Columbia | Spencer Entomological Museum, UBC                                |
| <i>Cladara limitaria</i>            | 08-JDWBC-0305  | LBCG305-08  | HQ647602 | Canada        | British Columbia | Spencer Entomological Museum, UBC                                |
| <i>Cladara limitaria</i>            | ENT991-010622  | GWNR615-07  | HQ647604 | Canada        | British Columbia | Royal British Columbia Museum                                    |
| <i>Cladara limitaria</i>            | ENT991-010627  | GWNR616-07  | HQ647603 | Canada        | British Columbia | Royal British Columbia Museum                                    |
| <i>Cladara limitaria</i>            | ENT991-066564  | GWNR614-07  | HQ647605 | Canada        | British Columbia | Royal British Columbia Museum                                    |
| <i>Cladara limitaria</i>            | ENT996-005662  | GWNR611-07  | HQ647606 | Canada        | British Columbia | Royal British Columbia Museum                                    |
| <i>Cladara limitaria</i>            | ENT996-005668  | GWNR609-07  | HQ647607 | Canada        | British Columbia | Royal British Columbia Museum                                    |
| <i>Cladara limitaria</i>            | FFC-2007-0230  | GWNP023-07  | HQ647595 | Canada        | British Columbia | Pacific Forestry Centre, Canadian Forest Service                 |
| <i>Cladara limitaria</i>            | UASM41858      | GWNS478-07  | HQ647594 | Canada        | Alberta          | Strickland Museum of Entomology, University of Alberta           |
| <i>Colostygia turbata</i>           | CNCLPE00033428 | GWNC429-07  | HQ647609 | Canada        | British Columbia | Canadian National Collection of Insects, Arachnids and Nematodes |
| <i>Colostygia turbata</i>           | HLC-20441      | LBCA441-05  | HQ647610 | Canada        | British Columbia | Biodiversity Institute of Ontario                                |
| <i>Colostygia turbata</i>           | UASM41706      | GWNS312-07  | HQ647608 | Canada        | Alberta          | Strickland Museum of Entomology, University of Alberta           |
| <i>Colostygia turbata</i>           | UASM95880      | GWNS582-07  | HQ647611 | Canada        | Alberta          | Strickland Museum of Entomology, University of Alberta           |
| <i>Colostygia turbata</i>           | UASM95881      | GWNS581-07  | HQ647612 | Canada        | Alberta          | Strickland Museum of Entomology, University of Alberta           |
| <i>Coryphista meadii</i>            | CBCC1025       | GWNS324-07  | HQ647615 | Canada        | Alberta          | Strickland Museum of Entomology, University of Alberta           |
| <i>Coryphista meadii</i>            | ENT996-004431  | GWNR427-07  | HQ647619 | Canada        | British Columbia | Royal British Columbia Museum                                    |
| <i>Coryphista meadii</i>            | ENT996-004438  | GWNR429-07  | HQ647617 | United States | Washington       | Royal British Columbia Museum                                    |
| <i>Coryphista meadii</i>            | ENT996-004443  | GWNR428-07  | HQ647618 | Canada        | British Columbia | Royal British Columbia Museum                                    |
| <i>Coryphista meadii</i>            | UASM59128      | GWNS583-07  | HQ647616 | Canada        | Alberta          | Strickland Museum of Entomology, University of Alberta           |
| <i>Coryphista meadii</i>            | UASM59730      | GWNS323-07  | HQ647614 | Canada        | British Columbia | Strickland Museum of Entomology, University of Alberta           |
| <i>Coryphista meadii</i>            | UASM99593      | GWNS607-08  | HQ647613 | Canada        | Alberta          | Strickland Museum of Entomology, University of Alberta           |
| <i>Costaconvexa centrostrigaria</i> | 10-GOBL-08     | GOBL008-10  | HQ647620 | Canada        | Ontario          | Barcode of Life Data System                                      |
| <i>Cyclophora dataria</i>           | ENT996-004281  | GWNR386-07  | HQ647624 | Canada        | British Columbia | Royal British Columbia Museum                                    |
| <i>Cyclophora dataria</i>           | ENT996-004283  | GWNR387-07  | HQ647623 | Canada        | British Columbia | Royal British Columbia Museum                                    |
| <i>Cyclophora dataria</i>           | ENT996-004300  | GWNR385-07  | HQ647625 | Canada        | British Columbia | Royal British Columbia Museum                                    |
| <i>Cyclophora dataria</i>           | FFC-2007-0225  | GWNP018-07  | HQ647622 | Canada        | British Columbia | Pacific Forestry Centre, Canadian Forest Service                 |
| <i>Cyclophora dataria</i>           | FFC-2007-0226  | GWNP019-07  | HQ647621 | Canada        | British Columbia | Pacific Forestry Centre, Canadian Forest Service                 |
| <i>Cyclophora packardii</i>         | JECW-07-0130   | GWNJ130-07  | HQ647626 | United States | Washington       | James Entomological Collection, Washington State University      |
| <i>Cyclophora pendulinaria</i>      | CNCLPE00033265 | GWNC266-07  | HQ647627 | Canada        | British Columbia | Canadian National Collection of Insects, Arachnids and Nematodes |
| <i>Cyclophora pendulinaria</i>      | ENT002-001650  | GWNR388-07  | HQ647631 | Canada        | British Columbia | Royal British Columbia Museum                                    |
| <i>Cyclophora pendulinaria</i>      | UASM24652      | GWNS248-07  | HQ647628 | Canada        | Alberta          | Strickland Museum of Entomology, University of Alberta           |
| <i>Cyclophora pendulinaria</i>      | UASM7157       | GWNS246-07  | HQ647630 | Canada        | Alberta          | Strickland Museum of Entomology, University of Alberta           |
| <i>Cyclophora pendulinaria</i>      | UASM78395      | GWNS247-07  | HQ647629 | Canada        | Alberta          | Strickland Museum of Entomology, University of Alberta           |
| <i>Dasytidonia avuncularia</i>      | CNCLPE00033358 | GWNC359-07  | HQ647632 | Canada        | Alberta          | Canadian National Collection of Insects, Arachnids and Nematodes |
| <i>Dasytidonia avuncularia</i>      | JECW-07-0030   | GWNJ030-07  | HQ647633 | Canada        | British Columbia | James Entomological Collection, Washington State University      |
| <i>Dasytidonia avuncularia</i>      | UASM24866      | GWNS064-07  | HQ647635 | Canada        | Alberta          | Strickland Museum of Entomology, University of Alberta           |
| <i>Dasytidonia avuncularia</i>      | UASM24867      | GWNS065-07  | HQ647634 | Canada        | Alberta          | Strickland Museum of Entomology, University of Alberta           |
| <i>Dichorda rectoria</i>            | 09-JDWGEO-357  | GNUA057-09  | HM392360 | United States | North Dakota     | Smithsonian Institution                                          |
| <i>Dichorda rectoria</i>            | 09-JDWGEO-358  | GNUA058-09  | HM392361 | United States | Oklahoma         | Smithsonian Institution                                          |
| <i>Dichorda rectoria</i>            | 09-JDWGEO-359  | GNUA059-09  | HM392362 | United States | New Mexico       | Smithsonian Institution                                          |
| <i>Digrammia californiaria</i>      | 08-JDWBC-1087  | LBCG1087-09 | HQ647640 | Canada        | British Columbia | Spencer Entomological Museum, UBC                                |
| <i>Digrammia californiaria</i>      | CNCLPE00033351 | GWNC352-07  | HQ647636 | Canada        | Alberta          | Canadian National Collection of Insects, Arachnids and Nematodes |
| <i>Digrammia californiaria</i>      | UASM57094      | GWNS048-07  | HQ647637 | Canada        | Alberta          | Strickland Museum of Entomology, University of Alberta           |
| <i>Digrammia californiaria</i>      | UASM57185      | GWNS047-07  | HQ647638 | Canada        | Alberta          | Strickland Museum of Entomology, University of Alberta           |
| <i>Digrammia californiaria</i>      | UASM57355      | GWNS046-07  | HQ647639 | Canada        | Alberta          | Strickland Museum of Entomology, University of Alberta           |
| <i>Digrammia curvata</i>            | 08-JDWBC-0125  | LBCG125-08  | HQ647649 | Canada        | British Columbia | Spencer Entomological Museum, UBC                                |
| <i>Digrammia curvata</i>            | 08-JDWBC-0131  | LBCG131-08  | HQ647648 | Canada        | British Columbia | Spencer Entomological Museum, UBC                                |
| <i>Digrammia curvata</i>            | 08-JDWBC-0427  | LBCG427-08  | HQ647655 | Canada        | British Columbia | Spencer Entomological Museum, UBC                                |
| <i>Digrammia curvata</i>            | 08-JDWBC-0429  | LBCG429-08  | HQ647654 | Canada        | British Columbia | Spencer Entomological Museum, UBC                                |
| <i>Digrammia curvata</i>            | 08-JDWBC-0430  | LBCG430-08  | HQ647653 | Canada        | British Columbia | Spencer Entomological Museum, UBC                                |
| <i>Digrammia curvata</i>            | 08-JDWBC-0491  | LBCG491-08  | HQ647652 | Canada        | British Columbia | Spencer Entomological Museum, UBC                                |
| <i>Digrammia curvata</i>            | 08-JDWBC-0499  | LBCG499-08  | HQ647651 | Canada        | British Columbia | Spencer Entomological Museum, UBC                                |
| <i>Digrammia curvata</i>            | 08-JDWBC-1108  | LBCG1108-09 | HQ647650 | Canada        | British Columbia | Spencer Entomological Museum, UBC                                |
| <i>Digrammia curvata</i>            | 08-JDWBC-1114  | LBCG1114-09 | HQ647673 | Canada        | British Columbia | Spencer Entomological Museum, UBC                                |
| <i>Digrammia curvata</i>            | 08-JDWBC-2120  | LBCG2120-09 | HQ647679 | Canada        | British Columbia | Spencer Entomological Museum, UBC                                |
| <i>Digrammia curvata</i>            | 08-JDWBC-2122  | LBCG2122-09 | HQ647678 | Canada        | British Columbia | Spencer Entomological Museum, UBC                                |
| <i>Digrammia curvata</i>            | 08-JDWBC-2125  | LBCG2125-09 | HQ647677 | Canada        | British Columbia | Spencer Entomological Museum, UBC                                |
| <i>Digrammia curvata</i>            | 08-JDWBC-2126  | LBCG2126-09 | HQ647676 | Canada        | British Columbia | Spencer Entomological Museum, UBC                                |
| <i>Digrammia curvata</i>            | 08-JDWBC-2127  | LBCG2127-09 | HQ647675 | Canada        | British Columbia | Spencer Entomological Museum, UBC                                |
| <i>Digrammia curvata</i>            | 08-JDWBC-2128  | LBCG2128-09 | HQ647674 | Canada        | British Columbia | Spencer Entomological Museum, UBC                                |
| <i>Digrammia curvata</i>            | 08-JDWBC-2591  | LBCG2591-09 | HQ647672 | Canada        | British Columbia | Spencer Entomological Museum, UBC                                |
| <i>Digrammia curvata</i>            | 08-JDWBC-2592  | LBCG2592-09 | HQ647671 | Canada        | British Columbia | Spencer Entomological Museum, UBC                                |
| <i>Digrammia curvata</i>            | 08-JDWBC-2593  | LBCG2593-09 | HQ647670 | Canada        | British Columbia | Spencer Entomological Museum, UBC                                |
| <i>Digrammia curvata</i>            | 08-JDWBC-2594  | LBCG2594-09 | HQ647669 | Canada        | British Columbia | Spencer Entomological Museum, UBC                                |
| <i>Digrammia curvata</i>            | 08-JDWBC-2595  | LBCG2595-09 | HQ647668 | Canada        | British Columbia | Spencer Entomological Museum, UBC                                |
| <i>Digrammia curvata</i>            | 08-JDWBC-2596  | LBCG2596-09 | HQ647667 | Canada        | British Columbia | Spencer Entomological Museum, UBC                                |
| <i>Digrammia curvata</i>            | 08-JDWBC-2912  | LBCG2912-09 | HQ647666 | Canada        | British Columbia | Spencer Entomological Museum, UBC                                |
| <i>Digrammia curvata</i>            | 08-JDWBC-2913  | LBCG2913-09 | HQ647665 | Canada        | British Columbia | Spencer Entomological Museum, UBC                                |
| <i>Digrammia curvata</i>            | 08-JDWBC-2914  | LBCG2914-09 | HQ647664 | Canada        | British Columbia | Spencer Entomological Museum, UBC                                |
| <i>Digrammia curvata</i>            | 08-JDWBC-2915  | LBCG2915-09 | HQ647663 | Canada        | British Columbia | Spencer Entomological Museum, UBC                                |
| <i>Digrammia curvata</i>            | 08-JDWBC-2916  | LBCG2916-09 | HQ647662 | Canada        | British Columbia | Spencer Entomological Museum, UBC                                |
| <i>Digrammia curvata</i>            | 08-JDWBC-2917  | LBCG2917-09 | HQ647661 | Canada        | British Columbia | Spencer Entomological Museum, UBC                                |
| <i>Digrammia curvata</i>            | 08-JDWBC-2918  | LBCG2918-09 | HQ647660 | Canada        | British Columbia | Spencer Entomological Museum, UBC                                |
| <i>Digrammia curvata</i>            | 08-JDWBC-3274  | LBCG3274-09 | HQ647659 | Canada        | British Columbia | Spencer Entomological Museum, UBC                                |
| <i>Digrammia curvata</i>            | 08-JDWBC-3275  | LBCG3275-09 | HQ647658 | Canada        | British Columbia | Spencer Entomological Museum, UBC                                |
| <i>Digrammia curvata</i>            | 08-JDWBC-3276  | LBCG3276-09 | HQ647657 | Canada        | British Columbia | Spencer Entomological Museum, UBC                                |
| <i>Digrammia curvata</i>            | 08-JDWBC-3308  | LBCG3308-09 | HQ647656 | Canada        | British Columbia | Spencer Entomological Museum, UBC                                |
| <i>Digrammia curvata</i>            | CNCLPE00033069 | GWNC070-07  | HQ647641 | Canada        | British Columbia | Canadian National Collection of Insects, Arachnids and Nematodes |
| <i>Digrammia curvata</i>            | ENT996-003358  | GWNR045-07  | HQ647647 | United States | Idaho            | Royal British Columbia Museum                                    |
| <i>Digrammia curvata</i>            | JD1944         | GWNS043-07  | HQ647643 | Canada        | British Columbia | Strickland Museum of Entomology, University of Alberta           |
| <i>Digrammia curvata</i>            | JECW-07-0002   | GWNJ002-07  | HQ647642 | United States | Washington       | James Entomological Collection, Washington State University      |
| <i>Digrammia curvata</i>            | UASM57118      | GWNS042-07  | HQ647644 | Canada        | Alberta          | Strickland Museum of Entomology, University of Alberta           |
| <i>Digrammia curvata</i>            | UASM57480      | GWNS040-07  | HQ647646 | Canada        | Alberta          | Strickland Museum of Entomology, University of Alberta           |
| <i>Digrammia curvata</i>            | UASM58935      | GWNS041-07  | HQ647645 | Canada        | Alberta          | Strickland Museum of Entomology, University of Alberta           |
| <i>Digrammia decorata</i>           | CNCLPE00033077 | GWNC078-07  | HQ647681 | Canada        | British Columbia | Canadian National Collection of Insects, Arachnids and Nematodes |
| <i>Digrammia decorata</i>           | CNCLPE00033352 | GWNC353-07  | HQ647680 | Canada        | British Columbia | Canadian National Collection of Insects, Arachnids and Nematodes |
| <i>Digrammia decorata</i>           | CNCLPE00033353 | GWNC354-07  | HQ647682 | Canada        | Alberta          | Canadian National Collection of Insects, Arachnids and Nematodes |
| <i>Digrammia decorata</i>           | UASM41643      | GWNS050-07  | HQ647683 | Canada        | Alberta          | Strickland Museum of Entomology, University of Alberta           |
| <i>Digrammia decorata</i>           | UASM57200      | GWNS049-07  | HQ647684 | Canada        | Alberta          | Strickland Museum of Entomology, University of Alberta           |
| <i>Digrammia delectata</i>          | 08-JDWBC-1137  | LBCG1137-09 | HQ647690 | Canada        | British Columbia | Spencer Entomological Museum, UBC                                |
| <i>Digrammia delectata</i>          | ENT992-004607  | GWNR051-07  | HQ647687 | Canada        | British Columbia | Royal British Columbia Museum                                    |
| <i>Digrammia delectata</i>          | ENT996-003280  | GWNR041-07  | HQ647689 | United States | Idaho            | Royal British Columbia Museum                                    |
| <i>Digrammia delectata</i>          | ENT996-003284  | GWNR042-07  | HQ647688 | United States | Washington       | Royal British Columbia Museum                                    |
| <i>Digrammia delectata</i>          | JECW-07-0015   | GWNJ015-07  | HQ647686 | United States | Washington       | James Entomological Collection, Washington State University      |
| <i>Digrammia delectata</i>          | JECW-07-0016   | GWNJ016-07  | HQ647685 | United States | Washington       | James Entomological Collection, Washington State University      |
| <i>Digrammia denticulata</i>        | 08-JDWBC-0036  | LBCG036-08  | HQ647701 | Canada        | British Columbia | Spencer Entomological Museum, UBC                                |
| <i>Digrammia denticulata</i>        | 08-JDWBC-0038  | LBCG038-08  | HQ647700 | Canada        | British Columbia | Spencer Entomological Museum, UBC                                |
| <i>Digrammia denticulata</i>        | 08-JDWBC-0049  | LBCG049-08  | HQ647699 | Canada        | British Columbia | Spencer Entomological Museum, UBC                                |
| <i>Digrammia denticulata</i>        | 08-JDWBC-2124  | LBCG2124-09 | HQ647703 | Canada        | British Columbia | Spencer Entomological Museum, UBC                                |
| <i>Digrammia denticulata</i>        | 08-JDWBC-2590  | LBCG2590-09 | HQ647702 | Canada        | British Columbia | Spencer Entomological Museum, UBC                                |
| <i>Digrammia denticulata</i>        | CNCLPE00033346 | GWNC347-07  | HQ647691 | Canada        | British Columbia | Canadian National Collection of Insects, Arachnids and Nematodes |

|                                    |                    |             |          |               |                  |                                                                  |
|------------------------------------|--------------------|-------------|----------|---------------|------------------|------------------------------------------------------------------|
| <i>Digrammia denticulata</i>       | ENT002-001541      | GWNR053-07  | HQ647697 | Canada        | British Columbia | Royal British Columbia Museum                                    |
| <i>Digrammia denticulata</i>       | ENT1996-003288     | GWNR071-07  | HQ647696 | Canada        | British Columbia | Royal British Columbia Museum                                    |
| <i>Digrammia denticulata</i>       | ENT1996-003386     | GWNR052-07  | HQ647698 | Canada        | British Columbia | Royal British Columbia Museum                                    |
| <i>Digrammia denticulata</i>       | JD0205             | GWNS510-07  | HQ647695 | Canada        | Alberta          | Strickland Museum of Entomology, University of Alberta           |
| <i>Digrammia denticulata</i>       | JECW-07-0017       | GWNNJ017-07 | HQ647692 | United States | Washington       | James Entomological Collection, Washington State University      |
| <i>Digrammia denticulata</i>       | UASM57479          | GWNS045-07  | HQ647693 | Canada        | Alberta          | Strickland Museum of Entomology, University of Alberta           |
| <i>Digrammia denticulata</i>       | UASM58855          | GWNS044-07  | HQ647694 | Canada        | Alberta          | Strickland Museum of Entomology, University of Alberta           |
| <i>Digrammia irrorata</i>          | CNACLEP00033354    | GWNS355-07  | HQ647705 | Canada        | Alberta          | Canadian National Collection of Insects, Arachnids and Nematodes |
| <i>Digrammia irrorata</i>          | CNACLEP00033355    | GWNC356-07  | HQ647704 | Canada        | Alberta          | Canadian National Collection of Insects, Arachnids and Nematodes |
| <i>Digrammia irrorata</i>          | JECW-07-0019       | GWNNJ019-07 | HQ647706 | United States | Washington       | James Entomological Collection, Washington State University      |
| <i>Digrammia irrorata</i>          | UASM57117          | GWNS055-07  | HQ647707 | Canada        | Alberta          | Strickland Museum of Entomology, University of Alberta           |
| <i>Digrammia irrorata</i>          | UASM57267          | GWNS054-07  | HQ647708 | Canada        | Alberta          | Strickland Museum of Entomology, University of Alberta           |
| <i>Digrammia irrorata</i>          | WFBM-07-0009       | GWNNW009-07 | HQ647710 | United States | Idaho            | University of Idaho, W. F. Barr Entomological Collection         |
| <i>Digrammia irrorata</i>          | WFBM-07-0010       | GWNNW010-07 | HQ647709 | United States | Idaho            | University of Idaho, W. F. Barr Entomological Collection         |
| <i>Digrammia mellistrigata</i>     | CNACLEP00033356    | GWNC357-07  | HQ647711 | Canada        | Alberta          | Canadian National Collection of Insects, Arachnids and Nematodes |
| <i>Digrammia muscaria</i>          | PFC-2007-0350      | GWNP140-07  | HQ647714 | Canada        | British Columbia | Pacific Forestry Centre, Canadian Forest Service                 |
| <i>Digrammia muscaria</i>          | PFC-2007-0351      | GWNP141-07  | HQ647713 | Canada        | British Columbia | Pacific Forestry Centre, Canadian Forest Service                 |
| <i>Digrammia muscaria</i>          | PFC-2007-0352      | GWNP142-07  | HQ647712 | Canada        | British Columbia | Pacific Forestry Centre, Canadian Forest Service                 |
| <i>Digrammia neptaria</i>          | 08-JDWBC-0046      | LBCG046-08  | HQ647722 | Canada        | British Columbia | Spencer Entomological Museum, UBC                                |
| <i>Digrammia neptaria</i>          | 08-JDWBC-0047      | LBCG047-08  | HQ647721 | Canada        | British Columbia | Spencer Entomological Museum, UBC                                |
| <i>Digrammia neptaria</i>          | 08-JDWBC-0048      | LBCG048-08  | HQ647720 | Canada        | British Columbia | Spencer Entomological Museum, UBC                                |
| <i>Digrammia neptaria</i>          | 08-JDWBC-1071      | LBCG1071-09 | HQ647723 | Canada        | British Columbia | Spencer Entomological Museum, UBC                                |
| <i>Digrammia neptaria</i>          | CNACLEP000333080   | GWNC081-07  | HQ647715 | Canada        | British Columbia | Canadian National Collection of Insects, Arachnids and Nematodes |
| <i>Digrammia neptaria</i>          | ENT991-126956      | GWNR057-07  | HQ647719 | Canada        | British Columbia | Royal British Columbia Museum                                    |
| <i>Digrammia neptaria</i>          | UASM58268          | GWNS057-07  | HQ647717 | Canada        | Alberta          | Strickland Museum of Entomology, University of Alberta           |
| <i>Digrammia neptaria</i>          | UASM77934          | GWNS058-07  | HQ647716 | Canada        | Alberta          | Strickland Museum of Entomology, University of Alberta           |
| <i>Digrammia neptaria</i>          | UASM95799          | GWNS056-07  | HQ647718 | Canada        | Alberta          | Strickland Museum of Entomology, University of Alberta           |
| <i>Digrammia nubiculata</i>        | JECW-07-0020       | GWNJ020-07  | HQ647726 | United States | Washington       | James Entomological Collection, Washington State University      |
| <i>Digrammia nubiculata</i>        | JECW-07-0021       | GWNJ021-07  | HQ647725 | United States | Washington       | James Entomological Collection, Washington State University      |
| <i>Digrammia nubiculata</i>        | JECW-07-0022       | GWNJ022-07  | HQ647724 | United States | Washington       | James Entomological Collection, Washington State University      |
| <i>Digrammia nubiculata</i>        | WFBM-07-0011       | GWNNW011-07 | HQ647727 | United States | Idaho            | University of Idaho, W. F. Barr Entomological Collection         |
| <i>Digrammia ordinata</i>          | 08-JDWBC-1096      | LBCG1096-09 | HQ647732 | Canada        | British Columbia | Spencer Entomological Museum, UBC                                |
| <i>Digrammia ordinata</i>          | 08-JDWBC-1110      | LBCG1110-09 | HQ647731 | Canada        | British Columbia | Spencer Entomological Museum, UBC                                |
| <i>Digrammia ordinata</i>          | CNACLEP00033065    | GWNC066-07  | HQ647730 | Canada        | British Columbia | Canadian National Collection of Insects, Arachnids and Nematodes |
| <i>Digrammia ordinata</i>          | CNACLEP00033066    | GWNC067-07  | HQ647729 | Canada        | British Columbia | Canadian National Collection of Insects, Arachnids and Nematodes |
| <i>Digrammia ordinata</i>          | CNACLEP00033347    | GWNC348-07  | HQ647728 | Canada        | British Columbia | Canadian National Collection of Insects, Arachnids and Nematodes |
| <i>Digrammia ordinata</i>          | 08-JDWBC-1085      | LBCG1085-09 | HQ647739 | Canada        | British Columbia | Spencer Entomological Museum, UBC                                |
| <i>Digrammia perspersata</i>       | CNACLEP00033075    | GWNC076-07  | HQ647735 | Canada        | British Columbia | Canadian National Collection of Insects, Arachnids and Nematodes |
| <i>Digrammia perspersata</i>       | CNACLEP00033348    | GWNC349-07  | HQ647734 | Canada        | British Columbia | Canadian National Collection of Insects, Arachnids and Nematodes |
| <i>Digrammia perspersata</i>       | CNACLEP00033349    | GWNC350-07  | HQ647733 | Canada        | British Columbia | Canadian National Collection of Insects, Arachnids and Nematodes |
| <i>Digrammia perspersata</i>       | ENT996-003390      | GWNR060-07  | HQ647738 | Canada        | British Columbia | Royal British Columbia Museum                                    |
| <i>Digrammia perspersata</i>       | JECW-07-0023       | GWNJ023-07  | HQ647737 | United States | Washington       | James Entomological Collection, Washington State University      |
| <i>Digrammia perspersata</i>       | JECW-07-0024       | GWNJ024-07  | HQ647736 | United States | Washington       | James Entomological Collection, Washington State University      |
| <i>Digrammia rippertaria</i>       | ENT002-001542      | GWNR054-07  | HQ647743 | Canada        | British Columbia | Royal British Columbia Museum                                    |
| <i>Digrammia rippertaria</i>       | NFRP-P-2007-100012 | GWNN012-07  | HQ647742 | Canada        | Alberta          | Northern Forestry Centre, Canadian Forest Service                |
| <i>Digrammia rippertaria</i>       | UASM53012          | GWNS051-07  | HQ647741 | Canada        | Alberta          | Strickland Museum of Entomology, University of Alberta           |
| <i>Digrammia rippertaria</i>       | UASM58890          | GWNS053-07  | HQ647740 | Canada        | Alberta          | Strickland Museum of Entomology, University of Alberta           |
| <i>Digrammia rippertaria</i>       | UASM78402          | GWNS558-07  | HQ647745 | Canada        | Alberta          | Strickland Museum of Entomology, University of Alberta           |
| <i>Digrammia rippertaria</i>       | UASM78403          | GWNS559-07  | HQ647744 | Canada        | Alberta          | Strickland Museum of Entomology, University of Alberta           |
| <i>Digrammia rippertaria</i>       | UASM78404          | GWNS557-07  | HQ647746 | Canada        | Alberta          | Strickland Museum of Entomology, University of Alberta           |
| <i>Digrammia rippertaria</i>       | UASM95861          | GWNS526-07  | HQ647748 | Canada        | Alberta          | Strickland Museum of Entomology, University of Alberta           |
| <i>Digrammia rippertaria</i>       | UASM95871          | GWNS542-07  | HQ647747 | Canada        | Alberta          | Strickland Museum of Entomology, University of Alberta           |
| <i>Digrammia setonana</i>          | 08-JDWBC-0361      | LBCG361-08  | HQ647752 | Canada        | British Columbia | Spencer Entomological Museum, UBC                                |
| <i>Digrammia setonana</i>          | 08-JDWBC-1303      | LBCG1303-09 | HQ647753 | Canada        | British Columbia | Spencer Entomological Museum, UBC                                |
| <i>Digrammia setonana</i>          | 08-JDWBC-2119      | LBCG2119-09 | HQ647757 | Canada        | British Columbia | Spencer Entomological Museum, UBC                                |
| <i>Digrammia setonana</i>          | 08-JDWBC-2121      | LBCG2121-09 | HQ647756 | Canada        | British Columbia | Spencer Entomological Museum, UBC                                |
| <i>Digrammia setonana</i>          | 08-JDWBC-2123      | LBCG2123-09 | HQ647755 | Canada        | British Columbia | Spencer Entomological Museum, UBC                                |
| <i>Digrammia setonana</i>          | 08-JDWBC-2589      | LBCG2589-09 | HQ647754 | Canada        | British Columbia | Spencer Entomological Museum, UBC                                |
| <i>Digrammia setonana</i>          | Dun-08-063         | DUNLP063-08 | HQ647749 | Canada        | British Columbia | Pacific Forestry Centre, Canadian Forest Service                 |
| <i>Digrammia setonana</i>          | ENT1996-003346     | GWNR064-07  | HQ647751 | Canada        | British Columbia | Royal British Columbia Museum                                    |
| <i>Digrammia setonana</i>          | PFC-2007-0353      | GWNP143-07  | HQ647750 | Canada        | British Columbia | Pacific Forestry Centre, Canadian Forest Service                 |
| <i>Digrammia subminiata</i>        | CNACLEP00033357    | GWNC358-07  | HQ647758 | Canada        | Alberta          | Canadian National Collection of Insects, Arachnids and Nematodes |
| <i>Digrammia subminiata</i>        | JECW-07-0027       | GWNJ027-07  | HQ647760 | United States | Washington       | James Entomological Collection, Washington State University      |
| <i>Digrammia subminiata</i>        | JECW-07-0028       | GWNJ028-07  | HQ647759 | United States | Washington       | James Entomological Collection, Washington State University      |
| <i>Digrammia subminiata</i>        | UASM57247          | GWNS061-07  | HQ647761 | Canada        | Alberta          | Strickland Museum of Entomology, University of Alberta           |
| <i>Digrammia subminiata</i>        | UASM58490          | GWNS060-07  | HQ647762 | Canada        | Alberta          | Strickland Museum of Entomology, University of Alberta           |
| <i>Digrammia subminiata</i>        | UASM77972          | GWNS059-07  | HQ647763 | Canada        | Alberta          | Strickland Museum of Entomology, University of Alberta           |
| <i>Digrammia subminiata</i>        | WFBM-07-0014       | GWNNW014-07 | HQ647764 | United States | Idaho            | University of Idaho, W. F. Barr Entomological Collection         |
| <i>Digrammia trivata</i>           | 08-JDWBC-0380      | LBCG380-08  | HQ647767 | Canada        | British Columbia | Spencer Entomological Museum, UBC                                |
| <i>Digrammia trivata</i>           | 08-JDWBC-2129      | LBCG2129-09 | HQ647775 | Canada        | British Columbia | Spencer Entomological Museum, UBC                                |
| <i>Digrammia trivata</i>           | 08-JDWBC-2130      | LBCG2130-09 | HQ647774 | Canada        | British Columbia | Spencer Entomological Museum, UBC                                |
| <i>Digrammia trivata</i>           | 08-JDWBC-2131      | LBCG2131-09 | HQ647773 | Canada        | British Columbia | Spencer Entomological Museum, UBC                                |
| <i>Digrammia trivata</i>           | 08-JDWBC-2132      | LBCG2132-09 | HQ647772 | Canada        | British Columbia | Spencer Entomological Museum, UBC                                |
| <i>Digrammia trivata</i>           | 08-JDWBC-2134      | LBCG2134-09 | HQ647771 | Canada        | British Columbia | Spencer Entomological Museum, UBC                                |
| <i>Digrammia trivata</i>           | 08-JDWBC-2135      | LBCG2135-09 | HQ647770 | Canada        | British Columbia | Spencer Entomological Museum, UBC                                |
| <i>Digrammia trivata</i>           | 08-JDWBC-2136      | LBCG2136-09 | HQ647769 | Canada        | British Columbia | Spencer Entomological Museum, UBC                                |
| <i>Digrammia trivata</i>           | 08-JDWBC-2137      | LBCG2137-09 | HQ647768 | Canada        | British Columbia | Spencer Entomological Museum, UBC                                |
| <i>Digrammia trivata</i>           | CNACLEP00033350    | GWNC351-07  | HQ647765 | Canada        | British Columbia | Canadian National Collection of Insects, Arachnids and Nematodes |
| <i>Digrammia trivata</i>           | Dun-08-064         | DUNLP064-08 | HQ647766 | Canada        | British Columbia | Pacific Forestry Centre, Canadian Forest Service                 |
| <i>Drepanulatrix biflata</i>       | WFBM-07-0037       | GWNNW037-07 | HQ647776 | United States | Idaho            | University of Idaho, W. F. Barr Entomological Collection         |
| <i>Drepanulatrix carnearia</i>     | UASM59634          | GWNS108-07  | HQ647777 | Canada        | Alberta          | Strickland Museum of Entomology, University of Alberta           |
| <i>Drepanulatrix carnearia</i>     | WFBM-07-0038       | GWNNW038-07 | HQ647778 | United States | Idaho            | University of Idaho, W. F. Barr Entomological Collection         |
| <i>Drepanulatrix falcata</i>       | 08-JDWBC-1060      | LBCG1060-09 | HQ647785 | Canada        | British Columbia | Spencer Entomological Museum, UBC                                |
| <i>Drepanulatrix falcata</i>       | 08-JDWBC-1061      | LBCG1061-09 | HQ647784 | Canada        | British Columbia | Spencer Entomological Museum, UBC                                |
| <i>Drepanulatrix falcata</i>       | 08-JDWBC-1063      | LBCG1063-09 | HQ647783 | Canada        | British Columbia | Spencer Entomological Museum, UBC                                |
| <i>Drepanulatrix falcata</i>       | 08-JDWBC-1079      | LBCG1079-09 | HQ647782 | Canada        | British Columbia | Spencer Entomological Museum, UBC                                |
| <i>Drepanulatrix falcata</i>       | 08-JDWBC-1088      | LBCG1088-09 | HQ647781 | Canada        | British Columbia | Spencer Entomological Museum, UBC                                |
| <i>Drepanulatrix falcata</i>       | CNACLEP00033147    | GWNC148-07  | HQ647779 | Canada        | British Columbia | Canadian National Collection of Insects, Arachnids and Nematodes |
| <i>Drepanulatrix falcata</i>       | ENT996-003748      | GWNR160-07  | HQ647786 | Canada        | British Columbia | Royal British Columbia Museum                                    |
| <i>Drepanulatrix falcata</i>       | ENT996-003808      | GWNR159-07  | HQ647787 | Canada        | British Columbia | Royal British Columbia Museum                                    |
| <i>Drepanulatrix falcata</i>       | JECW-07-0057       | GWNJ057-07  | HQ647788 | United States | Washington       | James Entomological Collection, Washington State University      |
| <i>Drepanulatrix foeminaria</i>    | CNACLEP00033145    | GWNC146-07  | HQ647780 | Canada        | British Columbia | Canadian National Collection of Insects, Arachnids and Nematodes |
| <i>Drepanulatrix foeminaria</i>    | JECW-07-0059       | GWNJ059-07  | HQ647789 | United States | Washington       | James Entomological Collection, Washington State University      |
| <i>Drepanulatrix foeminaria</i>    | WFBM-07-0039       | GWNNW039-07 | HQ647790 | United States | Washington       | University of Idaho, W. F. Barr Entomological Collection         |
| <i>Drepanulatrix foeminaria</i>    | WFBM-07-0041       | GWNNW041-07 | HQ647791 | United States | Idaho            | University of Idaho, W. F. Barr Entomological Collection         |
| <i>Drepanulatrix quadraria</i>     | JECW-07-0061       | GWNJ061-07  | HQ647792 | United States | Washington       | James Entomological Collection, Washington State University      |
| <i>Drepanulatrix secundaria</i>    | CNACLEP00033148    | GWNC149-07  | HQ647793 | Canada        | British Columbia | Canadian National Collection of Insects, Arachnids and Nematodes |
| <i>Drepanulatrix secundaria</i>    | ENT1996-003723     | GWNR165-07  | HQ647796 | Canada        | British Columbia | Royal British Columbia Museum                                    |
| <i>Drepanulatrix secundaria</i>    | JECW-07-0058       | GWNJ058-07  | HQ647794 | United States | Idaho            | James Entomological Collection, Washington State University      |
| <i>Drepanulatrix secundaria</i>    | SEM-UBC-GE0-0146   | GWNU087-07  | HQ647795 | Canada        | British Columbia | Spencer Entomological Museum, UBC                                |
| <i>Drepanulatrix unicalcararia</i> | 08-JDWBC-1080      | LBCG1080-09 | HQ647801 | Canada        | British Columbia | Spencer Entomological Museum, UBC                                |
| <i>Drepanulatrix unicalcararia</i> | 08-JDWBC-1082      | LBCG1082-09 | HQ647800 | Canada        | British Columbia | Spencer Entomological Museum, UBC                                |
| <i>Drepanulatrix unicalcararia</i> | CNACLEP00033141    | GWNC142-07  | HQ647797 | Canada        | British Columbia | Canadian National Collection of Insects, Arachnids and Nematodes |
| <i>Drepanulatrix unicalcararia</i> | ENT1996-003771     | GWNR171-07  | HQ647802 | Canada        | British Columbia | Royal British Columbia Museum                                    |
| <i>Drepanulatrix unicalcararia</i> | JECW-07-0064       | GWNJ064-07  | HQ647798 | United States | Idaho            | James Entomological Collection, Washington State University      |
| <i>Drepanulatrix unicalcararia</i> | WFBM-07-0042       | GWNNW042-07 | HQ647799 | United States | Idaho            | University of Idaho, W. F. Barr Entomological Collection         |
| <i>Dysstroma brunneata</i>         | 08-JDWBC-1337      | LBCG1337-09 | HQ647808 | Canada        | British Columbia | Spencer Entomological Museum, UBC                                |

|                                |                    |             |          |               |                  |                                                                  |
|--------------------------------|--------------------|-------------|----------|---------------|------------------|------------------------------------------------------------------|
| <i>Dysstroma brunneata</i>     | 08-JDWBC-1339      | LBCG1339-09 | HQ647807 | Canada        | British Columbia | Spencer Entomological Museum, UBC                                |
| <i>Dysstroma brunneata</i>     | CNCLPE00033380     | GWNC381-07  | HQ647803 | Canada        | Alberta          | Canadian National Collection of Insects, Arachnids and Nematodes |
| <i>Dysstroma brunneata</i>     | ENT996-007670      | GWNR622-07  | HQ647809 | Canada        | British Columbia | Royal British Columbia Museum                                    |
| <i>Dysstroma brunneata</i>     | JD1796             | GWNS508-07  | HQ647804 | Canada        | British Columbia | Strickland Museum of Entomology, University of Alberta           |
| <i>Dysstroma brunneata</i>     | NFRP-P-2007-100047 | GWNN047-07  | HQ647806 | Canada        | Alberta          | Northern Forestry Centre, Canadian Forest Service                |
| <i>Dysstroma brunneata</i>     | PFC-2007-0290      | GWNP083-07  | HQ647805 | Canada        | British Columbia | Pacific Forestry Centre, Canadian Forest Service                 |
| <i>Dysstroma citrata</i>       | 08-JDWBC-2330      | LBCG2330-09 | HQ647815 | Canada        | British Columbia | Spencer Entomological Museum, UBC                                |
| <i>Dysstroma citrata</i>       | CNCLPE00033285     | GWNC286-07  | HQ647810 | Canada        | Yukon Territory  | Canadian National Collection of Insects, Arachnids and Nematodes |
| <i>Dysstroma citrata</i>       | UASM7160           | GWNS291-07  | HQ647812 | Canada        | Alberta          | Strickland Museum of Entomology, University of Alberta           |
| <i>Dysstroma citrata</i>       | UASM7291           | GWNS292-07  | HQ647811 | Canada        | Alberta          | Strickland Museum of Entomology, University of Alberta           |
| <i>Dysstroma citrata</i>       | UASM78399          | GWNS571-07  | HQ647813 | Canada        | Alberta          | Strickland Museum of Entomology, University of Alberta           |
| <i>Dysstroma citrata</i>       | UASM78400          | GWNS570-07  | HQ647814 | Canada        | Alberta          | Strickland Museum of Entomology, University of Alberta           |
| <i>Dysstroma colvillei</i>     | 09-JDWGEO-475      | GNUA175-10  | HM392447 | United States | California       | Smithsonian Institution                                          |
| <i>Dysstroma colvillei</i>     | 09-JDWGEO-476      | GNUA176-10  | HM392448 | United States | California       | Smithsonian Institution                                          |
| <i>Dysstroma colvillei</i>     | 09-JDWGEO-477      | GNUA177-10  | HM392449 | United States | California       | Smithsonian Institution                                          |
| <i>Dysstroma colvillei</i>     | 09-JDWGEO-478      | GNUA178-10  | HM392450 | United States | California       | Smithsonian Institution                                          |
| <i>Dysstroma formosa</i>       | 08-JDWBC-0130      | LBCG130-08  | HQ647818 | Canada        | British Columbia | Spencer Entomological Museum, UBC                                |
| <i>Dysstroma formosa</i>       | 08-JDWBC-1336      | LBCG1336-09 | HQ647819 | Canada        | British Columbia | Spencer Entomological Museum, UBC                                |
| <i>Dysstroma formosa</i>       | ENT992-004604      | GWNR435-07  | HQ647817 | Canada        | British Columbia | Royal British Columbia Museum                                    |
| <i>Dysstroma formosa</i>       | JECW-07-0133       | GWNJ133-07  | HQ647817 | United States | Washington       | James Entomological Collection, Washington State University      |
| <i>Dysstroma hersiliata</i>    | ENT996-004641      | GWNR437-07  | HQ647824 | Canada        | British Columbia | Royal British Columbia Museum                                    |
| <i>Dysstroma hersiliata</i>    | ENT996-007662      | GWNR625-07  | HQ647825 | Canada        | British Columbia | Royal British Columbia Museum                                    |
| <i>Dysstroma hersiliata</i>    | NFRP-P-2007-100050 | GWNN050-07  | HQ647821 | Canada        | Alberta          | Northern Forestry Centre, Canadian Forest Service                |
| <i>Dysstroma hersiliata</i>    | NFRP-P-2007-100051 | GWNN051-07  | HQ647820 | Canada        | Alberta          | Northern Forestry Centre, Canadian Forest Service                |
| <i>Dysstroma hersiliata</i>    | UASM34966          | GWNS293-07  | HQ647822 | Canada        | Alberta          | Strickland Museum of Entomology, University of Alberta           |
| <i>Dysstroma hersiliata</i>    | UASM95863          | GWNS524-07  | HQ647823 | Canada        | Alberta          | Strickland Museum of Entomology, University of Alberta           |
| <i>Dysstroma infusata</i>      | CNCLPE00033300     | GWNC301-07  | HQ647827 | Canada        | Yukon Territory  | Canadian National Collection of Insects, Arachnids and Nematodes |
| <i>Dysstroma infusata</i>      | CNCLPE00033301     | GWNC302-07  | HQ647826 | Canada        | Yukon Territory  | Canadian National Collection of Insects, Arachnids and Nematodes |
| <i>Dysstroma infusata</i>      | UASM24173          | GWNS288-07  | HQ647828 | Canada        | Alberta          | Strickland Museum of Entomology, University of Alberta           |
| <i>Dysstroma infusata</i>      | UASM78397          | GWNS573-07  | HQ647829 | Canada        | Alberta          | Strickland Museum of Entomology, University of Alberta           |
| <i>Dysstroma manicata</i>      | JECW-07-0134       | GWNJ134-07  | HQ647830 | United States | California       | James Entomological Collection, Washington State University      |
| <i>Dysstroma ochrofuscaria</i> | ENT996-004696      | GWNR439-07  | HQ647831 | United States | California       | Royal British Columbia Museum                                    |
| <i>Dysstroma rutlandia</i>     | CNCLPE00033378     | GWNC379-07  | HQ647833 | Canada        | Alberta          | Canadian National Collection of Insects, Arachnids and Nematodes |
| <i>Dysstroma rutlandia</i>     | CNCLPE00033379     | GWNC380-07  | HQ647832 | Canada        | Alberta          | Canadian National Collection of Insects, Arachnids and Nematodes |
| <i>Dysstroma sobria</i>        | ENT987-001238      | GWNR441-07  | HQ647835 | Canada        | British Columbia | Royal British Columbia Museum                                    |
| <i>Dysstroma sobria</i>        | ENT991-131360      | GWNR440-07  | HQ647836 | Canada        | British Columbia | Royal British Columbia Museum                                    |
| <i>Dysstroma sobria</i>        | UASM59742          | GWNS286-07  | HQ647834 | Canada        | British Columbia | Strickland Museum of Entomology, University of Alberta           |
| <i>Dysstroma suspectata</i>    | CNCLPE00033290     | GWNC291-07  | HQ647837 | Canada        | Yukon Territory  | Canadian National Collection of Insects, Arachnids and Nematodes |
| <i>Dysstroma suspectata</i>    | CNCLPE00033377     | GWNC378-07  | HQ647838 | Canada        | Alberta          | Canadian National Collection of Insects, Arachnids and Nematodes |
| <i>Dysstroma suspectata</i>    | UASM24171          | GWNS290-07  | HQ647839 | Canada        | Alberta          | Strickland Museum of Entomology, University of Alberta           |
| <i>Dysstroma suspectata</i>    | UASM24172          | GWNS287-07  | HQ647840 | Canada        | Alberta          | Strickland Museum of Entomology, University of Alberta           |
| <i>Dysstroma truncata</i>      | 08-JDWBC-0758      | LBCG758-09  | HQ647863 | Canada        | British Columbia | Spencer Entomological Museum, UBC                                |
| <i>Dysstroma truncata</i>      | 08-JDWBC-0769      | LBCG769-09  | HQ647862 | Canada        | British Columbia | Spencer Entomological Museum, UBC                                |
| <i>Dysstroma truncata</i>      | 08-JDWBC-0770      | LBCG770-09  | HQ647861 | Canada        | British Columbia | Spencer Entomological Museum, UBC                                |
| <i>Dysstroma truncata</i>      | 08-JDWBC-0772      | LBCG772-09  | HQ647860 | Canada        | British Columbia | Spencer Entomological Museum, UBC                                |
| <i>Dysstroma truncata</i>      | 08-JDWBC-0784      | LBCG784-09  | HQ647859 | Canada        | British Columbia | Spencer Entomological Museum, UBC                                |
| <i>Dysstroma truncata</i>      | 08-JDWBC-0801      | LBCG801-09  | HQ647858 | Canada        | British Columbia | Spencer Entomological Museum, UBC                                |
| <i>Dysstroma truncata</i>      | 08-JDWBC-0802      | LBCG802-09  | HQ647857 | Canada        | British Columbia | Spencer Entomological Museum, UBC                                |
| <i>Dysstroma truncata</i>      | 08-JDWBC-0976      | LBCG976-09  | HQ647856 | Canada        | British Columbia | Spencer Entomological Museum, UBC                                |
| <i>Dysstroma truncata</i>      | 08-JDWBC-0991      | LBCG991-09  | HQ647855 | Canada        | British Columbia | Spencer Entomological Museum, UBC                                |
| <i>Dysstroma truncata</i>      | 08-JDWBC-1828      | LBCG1828-09 | HQ647865 | Canada        | British Columbia | Spencer Entomological Museum, UBC                                |
| <i>Dysstroma truncata</i>      | 08-JDWBC-2318      | LBCG2318-09 | HQ647864 | Canada        | British Columbia | Spencer Entomological Museum, UBC                                |
| <i>Dysstroma truncata</i>      | CNCLPE00033303     | GWNC304-07  | HQ647842 | Canada        | British Columbia | Canadian National Collection of Insects, Arachnids and Nematodes |
| <i>Dysstroma truncata</i>      | CNCLPE00033304     | GWNC305-07  | HQ647841 | Canada        | British Columbia | Canadian National Collection of Insects, Arachnids and Nematodes |
| <i>Dysstroma truncata</i>      | ENT002-001671      | GWNR434-07  | HQ647853 | Canada        | British Columbia | Royal British Columbia Museum                                    |
| <i>Dysstroma truncata</i>      | ENT991-104651      | GWNR443-07  | HQ647851 | Canada        | British Columbia | Royal British Columbia Museum                                    |
| <i>Dysstroma truncata</i>      | ENT992-021164      | GWNR479-07  | HQ647849 | Canada        | British Columbia | Royal British Columbia Museum                                    |
| <i>Dysstroma truncata</i>      | ENT996-004692      | GWNR431-07  | HQ647854 | United States | Washington       | Royal British Columbia Museum                                    |
| <i>Dysstroma truncata</i>      | ENT996-004774      | GWNR444-07  | HQ647850 | Canada        | British Columbia | Royal British Columbia Museum                                    |
| <i>Dysstroma truncata</i>      | ENT996-004779      | GWNR442-07  | HQ647852 | Canada        | British Columbia | Royal British Columbia Museum                                    |
| <i>Dysstroma truncata</i>      | JD1901             | GWNS509-07  | HQ647843 | Canada        | British Columbia | Strickland Museum of Entomology, University of Alberta           |
| <i>Dysstroma truncata</i>      | PFC-2007-0288      | GWNP081-07  | HQ647844 | Canada        | British Columbia | Pacific Forestry Centre, Canadian Forest Service                 |
| <i>Dysstroma truncata</i>      | PFC-2007-0289      | GWNP082-07  | HQ647845 | Canada        | British Columbia | Pacific Forestry Centre, Canadian Forest Service                 |
| <i>Dysstroma truncata</i>      | UASM7292           | GWNS283-07  | HQ647848 | Canada        | Alberta          | Strickland Museum of Entomology, University of Alberta           |
| <i>Dysstroma truncata</i>      | UASM95811          | GWNS284-07  | HQ647847 | Canada        | Alberta          | Strickland Museum of Entomology, University of Alberta           |
| <i>Dysstroma truncata</i>      | UASM95858          | GWNS519-07  | HQ647844 | Canada        | Alberta          | Strickland Museum of Entomology, University of Alberta           |
| <i>Dysstroma walkerata</i>     | 08-JDWBC-0740      | LBCG740-09  | HQ647896 | Canada        | British Columbia | Spencer Entomological Museum, UBC                                |
| <i>Dysstroma walkerata</i>     | 08-JDWBC-0742      | LBCG742-09  | HQ647895 | Canada        | British Columbia | Spencer Entomological Museum, UBC                                |
| <i>Dysstroma walkerata</i>     | 08-JDWBC-0744      | LBCG744-09  | HQ647894 | Canada        | British Columbia | Spencer Entomological Museum, UBC                                |
| <i>Dysstroma walkerata</i>     | 08-JDWBC-0749      | LBCG749-09  | HQ647893 | Canada        | British Columbia | Spencer Entomological Museum, UBC                                |
| <i>Dysstroma walkerata</i>     | 08-JDWBC-0750      | LBCG750-09  | HQ647892 | Canada        | British Columbia | Spencer Entomological Museum, UBC                                |
| <i>Dysstroma walkerata</i>     | 08-JDWBC-0751      | LBCG751-09  | HQ647891 | Canada        | British Columbia | Spencer Entomological Museum, UBC                                |
| <i>Dysstroma walkerata</i>     | 08-JDWBC-0752      | LBCG752-09  | HQ647890 | Canada        | British Columbia | Spencer Entomological Museum, UBC                                |
| <i>Dysstroma walkerata</i>     | 08-JDWBC-0753      | LBCG753-09  | HQ647889 | Canada        | British Columbia | Spencer Entomological Museum, UBC                                |
| <i>Dysstroma walkerata</i>     | 08-JDWBC-0776      | LBCG776-09  | HQ647888 | Canada        | British Columbia | Spencer Entomological Museum, UBC                                |
| <i>Dysstroma walkerata</i>     | 08-JDWBC-0782      | LBCG782-09  | HQ647887 | Canada        | British Columbia | Spencer Entomological Museum, UBC                                |
| <i>Dysstroma walkerata</i>     | 08-JDWBC-0783      | LBCG783-09  | HQ647886 | Canada        | British Columbia | Spencer Entomological Museum, UBC                                |
| <i>Dysstroma walkerata</i>     | 08-JDWBC-0785      | LBCG785-09  | HQ647885 | Canada        | British Columbia | Spencer Entomological Museum, UBC                                |
| <i>Dysstroma walkerata</i>     | 08-JDWBC-0786      | LBCG786-09  | HQ647884 | Canada        | British Columbia | Spencer Entomological Museum, UBC                                |
| <i>Dysstroma walkerata</i>     | 08-JDWBC-0787      | LBCG787-09  | HQ647883 | Canada        | British Columbia | Spencer Entomological Museum, UBC                                |
| <i>Dysstroma walkerata</i>     | 08-JDWBC-0788      | LBCG788-09  | HQ647882 | Canada        | British Columbia | Spencer Entomological Museum, UBC                                |
| <i>Dysstroma walkerata</i>     | 08-JDWBC-0789      | LBCG789-09  | HQ647881 | Canada        | British Columbia | Spencer Entomological Museum, UBC                                |
| <i>Dysstroma walkerata</i>     | 08-JDWBC-0790      | LBCG790-09  | HQ647880 | Canada        | British Columbia | Spencer Entomological Museum, UBC                                |
| <i>Dysstroma walkerata</i>     | 08-JDWBC-0791      | LBCG791-09  | HQ647879 | Canada        | British Columbia | Spencer Entomological Museum, UBC                                |
| <i>Dysstroma walkerata</i>     | 08-JDWBC-0792      | LBCG792-09  | HQ647878 | Canada        | British Columbia | Spencer Entomological Museum, UBC                                |
| <i>Dysstroma walkerata</i>     | 08-JDWBC-0794      | LBCG794-09  | HQ647877 | Canada        | British Columbia | Spencer Entomological Museum, UBC                                |
| <i>Dysstroma walkerata</i>     | 08-JDWBC-0800      | LBCG800-09  | HQ647876 | Canada        | British Columbia | Spencer Entomological Museum, UBC                                |
| <i>Dysstroma walkerata</i>     | 08-JDWBC-0975      | LBCG975-09  | HQ647875 | Canada        | British Columbia | Spencer Entomological Museum, UBC                                |
| <i>Dysstroma walkerata</i>     | 08-JDWBC-0993      | LBCG993-09  | HQ647874 | Canada        | British Columbia | Spencer Entomological Museum, UBC                                |
| <i>Dysstroma walkerata</i>     | 08-JDWBC-1007      | LBCG1007-09 | HQ647873 | Canada        | British Columbia | Spencer Entomological Museum, UBC                                |
| <i>Dysstroma walkerata</i>     | 08-JDWBC-1089      | LBCG1089-09 | HQ647872 | Canada        | British Columbia | Spencer Entomological Museum, UBC                                |
| <i>Dysstroma walkerata</i>     | 08-JDWBC-1823      | LBCG1823-09 | HQ647911 | Canada        | British Columbia | Spencer Entomological Museum, UBC                                |
| <i>Dysstroma walkerata</i>     | 08-JDWBC-1824      | LBCG1824-09 | HQ647910 | Canada        | British Columbia | Spencer Entomological Museum, UBC                                |
| <i>Dysstroma walkerata</i>     | 08-JDWBC-1825      | LBCG1825-09 | HQ647909 | Canada        | British Columbia | Spencer Entomological Museum, UBC                                |
| <i>Dysstroma walkerata</i>     | 08-JDWBC-1826      | LBCG1826-09 | HQ647908 | Canada        | British Columbia | Spencer Entomological Museum, UBC                                |
| <i>Dysstroma walkerata</i>     | 08-JDWBC-1827      | LBCG1827-09 | HQ647907 | Canada        | British Columbia | Spencer Entomological Museum, UBC                                |
| <i>Dysstroma walkerata</i>     | 08-JDWBC-1829      | LBCG1829-09 | HQ647906 | Canada        | British Columbia | Spencer Entomological Museum, UBC                                |
| <i>Dysstroma walkerata</i>     | 08-JDWBC-1830      | LBCG1830-09 | HQ647905 | Canada        | British Columbia | Spencer Entomological Museum, UBC                                |
| <i>Dysstroma walkerata</i>     | 08-JDWBC-1831      | LBCG1831-09 | HQ647904 | Canada        | British Columbia | Spencer Entomological Museum, UBC                                |
| <i>Dysstroma walkerata</i>     | 08-JDWBC-1832      | LBCG1832-09 | HQ647903 | Canada        | British Columbia | Spencer Entomological Museum, UBC                                |
| <i>Dysstroma walkerata</i>     | 08-JDWBC-1833      | LBCG1833-09 | HQ647902 | Canada        | British Columbia | Spencer Entomological Museum, UBC                                |
| <i>Dysstroma walkerata</i>     | 08-JDWBC-1834      | LBCG1834-09 | HQ647901 | Canada        | British Columbia | Spencer Entomological Museum, UBC                                |
| <i>Dysstroma walkerata</i>     | 08-JDWBC-1837      | LBCG1837-09 | HQ647900 | Canada        | British Columbia | Spencer Entomological Museum, UBC                                |
| <i>Dysstroma walkerata</i>     | 08-JDWBC-1838      | LBCG1838-09 | HQ647899 | Canada        | British Columbia | Spencer Entomological Museum, UBC                                |
| <i>Dysstroma walkerata</i>     | 08-JDWBC-1839      | LBCG1839-09 | HQ647898 | Canada        | British Columbia | Spencer Entomological Museum, UBC                                |
| <i>Dysstroma walkerata</i>     | 08-JDWBC-1840      | LBCG1840-09 | HQ647897 | Canada        | British Columbia | Spencer Entomological Museum, UBC                                |
| <i>Dysstroma walkerata</i>     | CNCLPE00033302     | GWNC303-07  | HQ647867 | Canada        | British Columbia | Canadian National Collection of Insects, Arachnids and Nematodes |

|                               |                    |             |          |               |                  |                                                                  |
|-------------------------------|--------------------|-------------|----------|---------------|------------------|------------------------------------------------------------------|
| <i>Dysstroma walkerata</i>    | CNCLEP00033305     | GWNC306-07  | HQ647866 | Canada        | British Columbia | Canadian National Collection of Insects, Arachnids and Nematodes |
| <i>Dysstroma walkerata</i>    | ENT991-01037       | GWNR446-07  | HQ647871 | Canada        | British Columbia | Royal British Columbia Museum                                    |
| <i>Dysstroma walkerata</i>    | ENT996-004633      | GWNR447-07  | HQ647870 | Canada        | British Columbia | Royal British Columbia Museum                                    |
| <i>Dysstroma walkerata</i>    | UASM58659          | GWNS289-07  | HQ647868 | Canada        | Alberta          | Strickland Museum of Entomology, University of Alberta           |
| <i>Dysstroma walkerata</i>    | UASM78398          | GWNS572-07  | HQ647869 | Canada        | Alberta          | Strickland Museum of Entomology, University of Alberta           |
| <i>Ecliptopera silaceata</i>  | ENT002-002434      | GWNR449-07  | HQ647917 | Canada        | British Columbia | Royal British Columbia Museum                                    |
| <i>Ecliptopera silaceata</i>  | ENT992-020764      | GWNR450-07  | HQ647916 | Canada        | British Columbia | Royal British Columbia Museum                                    |
| <i>Ecliptopera silaceata</i>  | ENT996-004425      | GWNR451-07  | HQ647915 | United States | Washington       | Royal British Columbia Museum                                    |
| <i>Ecliptopera silaceata</i>  | UASM78421          | GWNS568-07  | HQ647913 | Canada        | Alberta          | Strickland Museum of Entomology, University of Alberta           |
| <i>Ecliptopera silaceata</i>  | UASM78422          | GWNS567-07  | HQ647914 | Canada        | Alberta          | Strickland Museum of Entomology, University of Alberta           |
| <i>Ecliptopera silaceata</i>  | UASM78426          | GWNS569-07  | HQ647912 | Canada        | Alberta          | Strickland Museum of Entomology, University of Alberta           |
| <i>Ectropis crepuscularia</i> | 07-JDWBC-0023      | GWND016-07  | HQ647923 | Canada        | British Columbia | Royal British Columbia Museum                                    |
| <i>Ectropis crepuscularia</i> | 07-JDWBC-0024      | GWND017-07  | HQ647922 | Canada        | British Columbia | Royal British Columbia Museum                                    |
| <i>Ectropis crepuscularia</i> | 07-JDWBC-0040      | GWND032-07  | HQ647921 | Canada        | British Columbia | Royal British Columbia Museum                                    |
| <i>Ectropis crepuscularia</i> | 07-JDWBC-0047      | GWND039-07  | HQ647920 | Canada        | British Columbia | Royal British Columbia Museum                                    |
| <i>Ectropis crepuscularia</i> | 07-JDWBC-0050      | GWND042-07  | HQ647919 | Canada        | British Columbia | Royal British Columbia Museum                                    |
| <i>Ectropis crepuscularia</i> | 08-JDWBC-0035      | LBCG035-08  | HQ647929 | Canada        | British Columbia | Spencer Entomological Museum, UBC                                |
| <i>Ectropis crepuscularia</i> | 08-JDWBC-0269      | LBCG269-08  | HQ647930 | Canada        | British Columbia | Spencer Entomological Museum, UBC                                |
| <i>Ectropis crepuscularia</i> | 08-JDWBC-0281      | LBCG281-08  | HQ647931 | Canada        | British Columbia | Spencer Entomological Museum, UBC                                |
| <i>Ectropis crepuscularia</i> | 08-JDWBC-0288      | LBCG288-08  | HQ647932 | Canada        | British Columbia | Spencer Entomological Museum, UBC                                |
| <i>Ectropis crepuscularia</i> | 08-JDWBC-0292      | LBCG292-08  | HQ647933 | Canada        | British Columbia | Spencer Entomological Museum, UBC                                |
| <i>Ectropis crepuscularia</i> | 08-JDWBC-0295      | LBCG295-08  | HQ647934 | Canada        | British Columbia | Spencer Entomological Museum, UBC                                |
| <i>Ectropis crepuscularia</i> | 08-JDWBC-0296      | LBCG296-08  | HQ647935 | Canada        | British Columbia | Spencer Entomological Museum, UBC                                |
| <i>Ectropis crepuscularia</i> | 08-JDWBC-0297      | LBCG297-08  | HQ647928 | Canada        | British Columbia | Spencer Entomological Museum, UBC                                |
| <i>Ectropis crepuscularia</i> | 08-JDWBC-0304      | LBCG304-08  | HQ647936 | Canada        | British Columbia | Spencer Entomological Museum, UBC                                |
| <i>Ectropis crepuscularia</i> | 08-JDWBC-0318      | LBCG318-08  | HQ647937 | Canada        | British Columbia | Spencer Entomological Museum, UBC                                |
| <i>Ectropis crepuscularia</i> | 08-JDWBC-0319      | LBCG319-08  | HQ647938 | Canada        | British Columbia | Spencer Entomological Museum, UBC                                |
| <i>Ectropis crepuscularia</i> | CNCLEP00033106     | GWNC107-07  | HQ647918 | Canada        | British Columbia | Canadian National Collection of Insects, Arachnids and Nematodes |
| <i>Ectropis crepuscularia</i> | ENT002-001544      | GWNR087-07  | HQ647926 | Canada        | British Columbia | Royal British Columbia Museum                                    |
| <i>Ectropis crepuscularia</i> | ENT991-10575temp   | GWNR375-07  | HQ647927 | Canada        | British Columbia | Royal British Columbia Museum                                    |
| <i>Ectropis crepuscularia</i> | UASM57997          | GWNS081-07  | HQ647924 | Canada        | Alberta          | Strickland Museum of Entomology, University of Alberta           |
| <i>Ectropis crepuscularia</i> | UASM58079          | GWNS080-07  | HQ647925 | Canada        | Alberta          | Strickland Museum of Entomology, University of Alberta           |
| <i>Ematurga amitaria</i>      | NFRC-P-2007-100016 | GWNO116-07  | HQ647939 | Canada        | Alberta          | Northern Forestry Centre, Canadian Forest Service                |
| <i>Enchoria lacteata</i>      | CNCLEP00034143     | GWNC581-07  | HQ647940 | United States | Washington       | Canadian National Collection of Insects, Arachnids and Nematodes |
| <i>Enchoria lacteata</i>      | JECW-07-0162       | GWNJ162-07  | HQ647944 | United States | Washington       | James Entomological Collection, Washington State University      |
| <i>Enchoria lacteata</i>      | JECW-07-0163       | GWNJ163-07  | HQ647942 | United States | Idaho            | James Entomological Collection, Washington State University      |
| <i>Enchoria lacteata</i>      | JECW-07-0164       | GWNJ164-07  | HQ647941 | United States | Idaho            | James Entomological Collection, Washington State University      |
| <i>Enchoria lacteata</i>      | FFC-2007-0332      | GWNP122-07  | HQ647943 | Canada        | British Columbia | Pacific Forestry Centre, Canadian Forest Service                 |
| <i>Ennomos alniaria</i>       | 08-JDWBC-3720      | LBCG3720-09 | HQ647957 | Canada        | British Columbia | Spencer Entomological Museum, UBC                                |
| <i>Ennomos alniaria</i>       | 08-JDWBC-3721      | LBCG3721-09 | HQ647956 | Canada        | British Columbia | Spencer Entomological Museum, UBC                                |
| <i>Ennomos alniaria</i>       | 08-JDWBC-3722      | LBCG3722-09 | HQ647955 | Canada        | British Columbia | Spencer Entomological Museum, UBC                                |
| <i>Ennomos alniaria</i>       | 08-JDWBC-3723      | LBCG3723-09 | HQ647954 | Canada        | British Columbia | Spencer Entomological Museum, UBC                                |
| <i>Ennomos alniaria</i>       | 08-JDWBC-3724      | LBCG3724-09 | HQ647953 | Canada        | British Columbia | Spencer Entomological Museum, UBC                                |
| <i>Ennomos alniaria</i>       | 08-JDWBC-3725      | LBCG3725-09 | HQ647952 | Canada        | British Columbia | Spencer Entomological Museum, UBC                                |
| <i>Ennomos alniaria</i>       | 08-JDWBC-3726      | LBCG3726-09 | HQ647951 | Canada        | British Columbia | Spencer Entomological Museum, UBC                                |
| <i>Ennomos alniaria</i>       | 08-JDWBC-3727      | LBCG3727-09 | HQ647950 | Canada        | British Columbia | Spencer Entomological Museum, UBC                                |
| <i>Ennomos alniaria</i>       | CNCLEP00021543     | GWNC457-07  | HQ647946 | Canada        | British Columbia | Canadian National Collection of Insects, Arachnids and Nematodes |
| <i>Ennomos alniaria</i>       | CNCLEP00021544     | GWNC458-07  | HQ647945 | Canada        | British Columbia | Canadian National Collection of Insects, Arachnids and Nematodes |
| <i>Ennomos alniaria</i>       | ENT006-000119      | GWNR339-07  | HQ647949 | Canada        | British Columbia | Royal British Columbia Museum                                    |
| <i>Ennomos alniaria</i>       | ENT006-000120      | GWNR340-07  | HQ647948 | Canada        | British Columbia | Royal British Columbia Museum                                    |
| <i>Ennomos alniaria</i>       | ENT006-000121      | GWNR341-07  | HQ647947 | Canada        | British Columbia | Royal British Columbia Museum                                    |
| <i>Ennomos magnaria</i>       | CNCLEP00033180     | GWNC181-07  | HQ647958 | Canada        | Alberta          | Canadian National Collection of Insects, Arachnids and Nematodes |
| <i>Ennomos magnaria</i>       | ENT002-001611      | GWNR240-07  | HQ647962 | Canada        | British Columbia | Royal British Columbia Museum                                    |
| <i>Ennomos magnaria</i>       | ENT991-011444      | GWNR239-07  | HQ647963 | Canada        | British Columbia | Royal British Columbia Museum                                    |
| <i>Ennomos magnaria</i>       | UASM57940          | GWNS155-07  | HQ647959 | Canada        | Alberta          | Strickland Museum of Entomology, University of Alberta           |
| <i>Ennomos magnaria</i>       | UASM58413          | GWNS153-07  | HQ647961 | Canada        | Alberta          | Strickland Museum of Entomology, University of Alberta           |
| <i>Ennomos magnaria</i>       | UASM58860          | GWNS154-07  | HQ647960 | Canada        | Alberta          | Strickland Museum of Entomology, University of Alberta           |
| <i>Entephria kidlullata</i>   | CNCLEP00033315     | GWNC316-07  | HQ647968 | Canada        | Yukon Territory  | Canadian National Collection of Insects, Arachnids and Nematodes |
| <i>Entephria kidlullata</i>   | CNCLEP00033392     | GWNC393-07  | HQ647967 | Canada        | Yukon Territory  | Canadian National Collection of Insects, Arachnids and Nematodes |
| <i>Entephria kidlullata</i>   | CNCLEP00033393     | GWNC394-07  | HQ647965 | Canada        | British Columbia | Canadian National Collection of Insects, Arachnids and Nematodes |
| <i>Entephria kidlullata</i>   | CNCLEP00034051     | GWNC489-07  | HQ647964 | Canada        | British Columbia | Canadian National Collection of Insects, Arachnids and Nematodes |
| <i>Entephria kidlullata</i>   | CNCLEP00034080     | GWNC518-07  | HQ647966 | Canada        | Yukon Territory  | Canadian National Collection of Insects, Arachnids and Nematodes |
| <i>Entephria kidlullata</i>   | ENT002-002425      | GWNR455-07  | HQ647972 | Canada        | British Columbia | Royal British Columbia Museum                                    |
| <i>Entephria kidlullata</i>   | UASM59231          | GWNS335-07  | HQ647971 | Canada        | Yukon Territory  | Strickland Museum of Entomology, University of Alberta           |
| <i>Entephria kidlullata</i>   | UASM59232          | GWNS336-07  | HQ647970 | Canada        | Yukon Territory  | Strickland Museum of Entomology, University of Alberta           |
| <i>Entephria kidlullata</i>   | UASM95814          | GWNS333-07  | HQ647969 | Canada        | British Columbia | Strickland Museum of Entomology, University of Alberta           |
| <i>Entephria lagganata</i>    | CNCLEP00033390     | GWNC391-07  | HQ647976 | Canada        | Alberta          | Canadian National Collection of Insects, Arachnids and Nematodes |
| <i>Entephria lagganata</i>    | CNCLEP00033391     | GWNC392-07  | HQ647975 | Canada        | Alberta          | Canadian National Collection of Insects, Arachnids and Nematodes |
| <i>Entephria lagganata</i>    | CNCLEP00034048     | GWNC486-07  | HQ647973 | Canada        | British Columbia | Canadian National Collection of Insects, Arachnids and Nematodes |
| <i>Entephria lagganata</i>    | CNCLEP00034049     | GWNC487-07  | HQ647974 | Canada        | Alberta          | Canadian National Collection of Insects, Arachnids and Nematodes |
| <i>Entephria lagganata</i>    | UASM59277          | GWNS332-07  | HQ647977 | Canada        | Alberta          | Strickland Museum of Entomology, University of Alberta           |
| <i>Entephria lagganata</i>    | UASM59412          | GWNS331-07  | HQ647978 | Canada        | Alberta          | Strickland Museum of Entomology, University of Alberta           |
| <i>Entephria multivagata</i>  | CNCLEP00033388     | GWNC389-07  | HQ647981 | Canada        | Alberta          | Canadian National Collection of Insects, Arachnids and Nematodes |
| <i>Entephria multivagata</i>  | CNCLEP00033389     | GWNC390-07  | HQ647980 | Canada        | Alberta          | Canadian National Collection of Insects, Arachnids and Nematodes |
| <i>Entephria multivagata</i>  | CNCLEP00034043     | GWNC481-07  | HQ647979 | Canada        | British Columbia | Canadian National Collection of Insects, Arachnids and Nematodes |
| <i>Entephria multivagata</i>  | ENT991-009943      | GWNR452-07  | HQ647986 | Canada        | British Columbia | Royal British Columbia Museum                                    |
| <i>Entephria multivagata</i>  | ENT996-004525      | GWNR454-07  | HQ647984 | Canada        | British Columbia | Royal British Columbia Museum                                    |
| <i>Entephria multivagata</i>  | ENT996-004528      | GWNR453-07  | HQ647985 | Canada        | British Columbia | Royal British Columbia Museum                                    |
| <i>Entephria multivagata</i>  | JECW-07-0148       | GWNJ148-07  | HQ647982 | Canada        | British Columbia | James Entomological Collection, Washington State University      |
| <i>Entephria multivagata</i>  | UASM95864          | GWNS525-07  | HQ647983 | Canada        | Alberta          | Strickland Museum of Entomology, University of Alberta           |
| <i>Entephria takuata</i>      | CNCLEP00033314     | GWNC315-07  | HQ647988 | Canada        | Yukon Territory  | Canadian National Collection of Insects, Arachnids and Nematodes |
| <i>Entephria takuata</i>      | CNCLEP00034045     | GWNC483-07  | HQ647989 | United States | Washington       | Canadian National Collection of Insects, Arachnids and Nematodes |
| <i>Entephria takuata</i>      | CNCLEP00034046     | GWNC484-07  | HQ647987 | Canada        | British Columbia | Canadian National Collection of Insects, Arachnids and Nematodes |
| <i>Enypha griseata</i>        | Dun-08-066         | DUNLP066-08 | HQ647993 | Canada        | British Columbia | Pacific Forestry Centre, Canadian Forest Service                 |
| <i>Enypha griseata</i>        | ENT996-004201      | GWNR283-07  | HQ647994 | Canada        | British Columbia | Royal British Columbia Museum                                    |
| <i>Enypha griseata</i>        | HLC-21021          | LBCB081-05  | HQ647992 | Canada        | British Columbia | Biodiversity Institute of Ontario                                |
| <i>Enypha griseata</i>        | HLC-23173          | LBCD353-05  | HQ647991 | Canada        | British Columbia | Biodiversity Institute of Ontario                                |
| <i>Enypha griseata</i>        | HLC-23181          | LBCD361-05  | HQ647990 | Canada        | British Columbia | Biodiversity Institute of Ontario                                |
| <i>Enypha packardata</i>      | 08-JDWBC-2324      | LBCG2324-09 | HQ648005 | Canada        | British Columbia | Spencer Entomological Museum, UBC                                |
| <i>Enypha packardata</i>      | CNCLEP00033233     | GWNC234-07  | HQ647998 | Canada        | British Columbia | Canadian National Collection of Insects, Arachnids and Nematodes |
| <i>Enypha packardata</i>      | CNCLEP00033234     | GWNC235-07  | HQ647997 | Canada        | British Columbia | Canadian National Collection of Insects, Arachnids and Nematodes |
| <i>Enypha packardata</i>      | CNCLEP00033235     | GWNC236-07  | HQ647996 | Canada        | British Columbia | Canadian National Collection of Insects, Arachnids and Nematodes |
| <i>Enypha packardata</i>      | Dun-08-065         | DUNLP065-08 | HQ647995 | Canada        | British Columbia | Pacific Forestry Centre, Canadian Forest Service                 |
| <i>Enypha packardata</i>      | ENT996-004204      | GWNR281-07  | HQ648001 | Canada        | British Columbia | Royal British Columbia Museum                                    |
| <i>Enypha packardata</i>      | ENT996-004207      | GWNR279-07  | HQ648002 | Canada        | British Columbia | Royal British Columbia Museum                                    |
| <i>Enypha packardata</i>      | ENT996-004214      | GWNR282-07  | HQ648000 | Canada        | British Columbia | Royal British Columbia Museum                                    |
| <i>Enypha packardata</i>      | ENT996-004215      | GWNR284-07  | HQ648006 | United States | Washington       | Royal British Columbia Museum                                    |
| <i>Enypha packardata</i>      | FFC-2007-0390      | GWNP180-07  | HQ648004 | Canada        | British Columbia | Pacific Forestry Centre, Canadian Forest Service                 |
| <i>Enypha packardata</i>      | FFC-2007-0391      | GWNP181-07  | HQ648003 | Canada        | British Columbia | Pacific Forestry Centre, Canadian Forest Service                 |
| <i>Enypha packardata</i>      | UASM95847          | GWNS497-07  | HQ647999 | Canada        | Alberta          | Strickland Museum of Entomology, University of Alberta           |
| <i>Enypha venata</i>          | 08-JDWBC-0746      | LBCG746-09  | HQ648011 | Canada        | British Columbia | Spencer Entomological Museum, UBC                                |
| <i>Enypha venata</i>          | 08-JDWBC-0973      | LBCG973-09  | HQ648010 | Canada        | British Columbia | Spencer Entomological Museum, UBC                                |
| <i>Enypha venata</i>          | 08-JDWBC-1844      | LBCG1844-09 | HQ648018 | Canada        | British Columbia | Spencer Entomological Museum, UBC                                |
| <i>Enypha venata</i>          | 08-JDWBC-1845      | LBCG1845-09 | HQ648017 | Canada        | British Columbia | Spencer Entomological Museum, UBC                                |
| <i>Enypha venata</i>          | 08-JDWBC-1846      | LBCG1846-09 | HQ648016 | Canada        | British Columbia | Spencer Entomological Museum, UBC                                |
| <i>Enypha venata</i>          | 08-JDWBC-1847      | LBCG1847-09 | HQ648015 | Canada        | British Columbia | Spencer Entomological Museum, UBC                                |
| <i>Enypha venata</i>          | 08-JDWBC-1848      | LBCG1848-09 | HQ648014 | Canada        | British Columbia | Spencer Entomological Museum, UBC                                |

|                                        |                    |             |          |               |                  |                                                                  |
|----------------------------------------|--------------------|-------------|----------|---------------|------------------|------------------------------------------------------------------|
| <i>Enyphia venata</i>                  | Dun-08-067         | DUNLP067-08 | HQ648007 | Canada        | British Columbia | Pacific Forestry Centre, Canadian Forest Service                 |
| <i>Enyphia venata</i>                  | ENT996-004088      | GWNR287-07  | HQ648012 | Canada        | British Columbia | Royal British Columbia Museum                                    |
| <i>Enyphia venata</i>                  | ENT996-007583      | GWNR285-07  | HQ648013 | Canada        | British Columbia | Royal British Columbia Museum                                    |
| <i>Enyphia venata</i>                  | UASM95855          | GWNS498-07  | HQ648009 | Canada        | Alberta          | Strickland Museum of Entomology, University of Alberta           |
| <i>Enyphia venata</i>                  | UASM95856          | GWNS499-07  | HQ648008 | Canada        | Alberta          | Strickland Museum of Entomology, University of Alberta           |
| <i>Epirrhoe alternata</i>              | ENT002-002433      | GWNR541-07  | HQ648022 | Canada        | British Columbia | Royal British Columbia Museum                                    |
| <i>Epirrhoe alternata</i>              | ENT992-020003      | GWNR540-07  | HQ648023 | Canada        | British Columbia | Royal British Columbia Museum                                    |
| <i>Epirrhoe alternata</i>              | HLC-20554          | LBCA554-05  | HQ648019 | Canada        | British Columbia | Biodiversity Institute of Ontario                                |
| <i>Epirrhoe alternata</i>              | UASM7021           | GWNS387-07  | HQ648020 | Canada        | Alberta          | Strickland Museum of Entomology, University of Alberta           |
| <i>Epirrhoe alternata</i>              | UASM95838          | GWNS496-07  | HQ648021 | Canada        | Yukon Territory  | Strickland Museum of Entomology, University of Alberta           |
| <i>Epirrhoe plebecculata</i>           | ENT996-004721      | GWNR544-07  | HQ648028 | United States | Washington       | Royal British Columbia Museum                                    |
| <i>Epirrhoe plebecculata</i>           | ENT996-004728      | GWNR542-07  | HQ648029 | Canada        | British Columbia | Royal British Columbia Museum                                    |
| <i>Epirrhoe plebecculata</i>           | JECW-07-0159       | GWNJ159-07  | HQ648025 | United States | Washington       | James Entomological Collection, Washington State University      |
| <i>Epirrhoe plebecculata</i>           | JECW-07-0160       | GWNJ160-07  | HQ648024 | United States | Idaho            | James Entomological Collection, Washington State University      |
| <i>Epirrhoe plebecculata</i>           | PF-2007-0330       | GWNP120-07  | HQ648027 | Canada        | British Columbia | Pacific Forestry Centre, Canadian Forest Service                 |
| <i>Epirrhoe plebecculata</i>           | UASM41837          | GWNS388-07  | HQ648026 | Canada        | Alberta          | Strickland Museum of Entomology, University of Alberta           |
| <i>Epirrhoe sperryi</i>                | ENT002-001729      | GWNR547-07  | HQ648035 | Canada        | British Columbia | Royal British Columbia Museum                                    |
| <i>Epirrhoe sperryi</i>                | ENT002-001733      | GWNR548-07  | HQ648034 | Canada        | British Columbia | Royal British Columbia Museum                                    |
| <i>Epirrhoe sperryi</i>                | ENT991-006425      | GWNR546-07  | HQ648036 | Canada        | Alberta          | Royal British Columbia Museum                                    |
| <i>Epirrhoe sperryi</i>                | ENT991-012521      | GWNR545-07  | HQ648037 | Canada        | British Columbia | Royal British Columbia Museum                                    |
| <i>Epirrhoe sperryi</i>                | JD0121             | GWNS390-07  | HQ648031 | Canada        | Alberta          | Strickland Museum of Entomology, University of Alberta           |
| <i>Epirrhoe sperryi</i>                | UASM95829          | GWNS389-07  | HQ648032 | Canada        | Alberta          | Strickland Museum of Entomology, University of Alberta           |
| <i>Epirrhoe sperryi</i>                | UASM95831          | GWNS391-07  | HQ648030 | Canada        | Alberta          | Strickland Museum of Entomology, University of Alberta           |
| <i>Epirrhoe sperryi</i>                | UASM95882          | GWNS594-07  | HQ648033 | Canada        | Alberta          | Strickland Museum of Entomology, University of Alberta           |
| <i>Epirrita autumnata</i>              | ENT002-001746      | GWNR596-07  | HQ648042 | Canada        | British Columbia | Royal British Columbia Museum                                    |
| <i>Epirrita autumnata</i>              | ENT002-001747      | GWNR594-07  | HQ648044 | Canada        | British Columbia | Royal British Columbia Museum                                    |
| <i>Epirrita autumnata</i>              | ENT002-001748      | GWNR595-07  | HQ648043 | Canada        | British Columbia | Royal British Columbia Museum                                    |
| <i>Epirrita autumnata</i>              | ENT996-004886      | GWNR593-07  | HQ648045 | Canada        | British Columbia | Royal British Columbia Museum                                    |
| <i>Epirrita autumnata</i>              | NFRP-P-2007-100088 | GWNN088-07  | HQ648038 | Canada        | Alberta          | Northern Forestry Centre, Canadian Forest Service                |
| <i>Epirrita autumnata</i>              | PF-2007-0243       | GWNP036-07  | HQ648041 | Canada        | Yukon Territory  | Pacific Forestry Centre, Canadian Forest Service                 |
| <i>Epirrita autumnata</i>              | PF-2007-0244       | GWNP037-07  | HQ648040 | Canada        | British Columbia | Pacific Forestry Centre, Canadian Forest Service                 |
| <i>Epirrita autumnata</i>              | PF-2007-0245       | GWNP038-07  | HQ648039 | Canada        | British Columbia | Pacific Forestry Centre, Canadian Forest Service                 |
| <i>Epirrita pulchra</i>                | PF-2007-0238       | GWNP031-07  | HQ648047 | Canada        | British Columbia | Pacific Forestry Centre, Canadian Forest Service                 |
| <i>Epirrita pulchra</i>                | PF-2007-0239       | GWNP032-07  | HQ648046 | Canada        | British Columbia | Pacific Forestry Centre, Canadian Forest Service                 |
| <i>Epirrita undulata</i>               | UASM41725          | GWNS406-07  | HQ648048 | Canada        | Alberta          | Strickland Museum of Entomology, University of Alberta           |
| <i>Erannis tiliaria</i>                | UASM41366          | GWNS097-07  | HQ648051 | Canada        | Alberta          | Strickland Museum of Entomology, University of Alberta           |
| <i>Erannis tiliaria</i>                | UASM56902          | GWNS098-07  | HQ648050 | Canada        | Alberta          | Strickland Museum of Entomology, University of Alberta           |
| <i>Erannis tiliaria</i>                | UASM7056           | GWNS099-07  | HQ648049 | Canada        | Alberta          | Strickland Museum of Entomology, University of Alberta           |
| <i>Erannis tiliaria</i>                | UASM95879          | GWNS580-07  | HQ648052 | Canada        | Alberta          | Strickland Museum of Entomology, University of Alberta           |
| <i>Erannis tiliaria vancouverensis</i> | CNLEP00033124      | GWNC125-07  | HQ648055 | Canada        | British Columbia | Canadian National Collection of Insects, Arachnids and Nematodes |
| <i>Erannis tiliaria vancouverensis</i> | CNLEP00033125      | GWNC126-07  | HQ648054 | Canada        | British Columbia | Canadian National Collection of Insects, Arachnids and Nematodes |
| <i>Erannis tiliaria vancouverensis</i> | Dun-08-069         | DUNLP069-08 | HQ648053 | Canada        | British Columbia | Pacific Forestry Centre, Canadian Forest Service                 |
| <i>Erannis tiliaria vancouverensis</i> | ENT991-010166      | GWNR133-07  | HQ648058 | Canada        | British Columbia | Royal British Columbia Museum                                    |
| <i>Erannis tiliaria vancouverensis</i> | ENT996-003643      | GWNR134-07  | HQ648057 | Canada        | British Columbia | Royal British Columbia Museum                                    |
| <i>Erannis tiliaria vancouverensis</i> | ENT996-003646      | GWNR135-07  | HQ648056 | United States | Washington       | Royal British Columbia Museum                                    |
| <i>Erannis tiliaria vancouverensis</i> | PF-2007-0380       | GWNP170-07  | HQ648059 | Canada        | British Columbia | Pacific Forestry Centre, Canadian Forest Service                 |
| <i>Eubaphe mendica</i>                 | ENT996-007836      | GWNR643-07  | HQ648064 | Canada        | British Columbia | Royal British Columbia Museum                                    |
| <i>Eubaphe mendica</i>                 | ENT996-007837      | GWNR644-07  | HQ648063 | Canada        | British Columbia | Royal British Columbia Museum                                    |
| <i>Eubaphe mendica</i>                 | ENT996-007841      | GWNR645-07  | HQ648062 | Canada        | British Columbia | Royal British Columbia Museum                                    |
| <i>Eubaphe mendica</i>                 | UASM43221          | GWNS411-07  | HQ648060 | Canada        | Alberta          | Strickland Museum of Entomology, University of Alberta           |
| <i>Eubaphe mendica</i>                 | UASM7024           | GWNS409-07  | HQ648061 | Canada        | Alberta          | Strickland Museum of Entomology, University of Alberta           |
| <i>Eubaphe unicolor</i>                | WFBM-07-0087       | GWNW087-07  | HQ648067 | United States | Arizona          | University of Idaho, W. F. Barr Entomological Collection         |
| <i>Eubaphe unicolor</i>                | WFBM-07-0088       | GWNW088-07  | HQ648066 | United States | Arizona          | University of Idaho, W. F. Barr Entomological Collection         |
| <i>Eubaphe unicolor</i>                | WFBM-07-0089       | GWNW089-07  | HQ648065 | United States | Texas            | University of Idaho, W. F. Barr Entomological Collection         |
| <i>Euchlaena johnsonaria</i>           | 08-JDWBC-1081      | LBCG1081-09 | HQ648076 | Canada        | British Columbia | Spencer Entomological Museum, UBC                                |
| <i>Euchlaena johnsonaria</i>           | 08-JDWBC-1083      | LBCG1083-09 | HQ648075 | Canada        | British Columbia | Spencer Entomological Museum, UBC                                |
| <i>Euchlaena johnsonaria</i>           | 08-JDWBC-2103      | LBCG2103-09 | HQ648080 | Canada        | British Columbia | Spencer Entomological Museum, UBC                                |
| <i>Euchlaena johnsonaria</i>           | 08-JDWBC-3309      | LBCG3309-09 | HQ648078 | Canada        | British Columbia | Spencer Entomological Museum, UBC                                |
| <i>Euchlaena johnsonaria</i>           | 08-JDWBC-3310      | LBCG3310-09 | HQ648077 | Canada        | British Columbia | Spencer Entomological Museum, UBC                                |
| <i>Euchlaena johnsonaria</i>           | ENT996-003779      | GWNR188-07  | HQ648079 | Canada        | British Columbia | Royal British Columbia Museum                                    |
| <i>Euchlaena johnsonaria</i>           | ENT996-007436      | GWNR372-07  | HQ648073 | Canada        | British Columbia | Royal British Columbia Museum                                    |
| <i>Euchlaena johnsonaria</i>           | ENT996-007437      | GWNR373-07  | HQ648072 | Canada        | British Columbia | Royal British Columbia Museum                                    |
| <i>Euchlaena johnsonaria</i>           | ENT996-007438      | GWNR374-07  | HQ648071 | Canada        | British Columbia | Royal British Columbia Museum                                    |
| <i>Euchlaena johnsonaria</i>           | SEM-UBC-GEO-0154   | GWNU090-07  | HQ648074 | Canada        | British Columbia | Spencer Entomological Museum, UBC                                |
| <i>Euchlaena johnsonaria</i>           | UASM57957          | GWNS119-07  | HQ648069 | Canada        | Alberta          | Strickland Museum of Entomology, University of Alberta           |
| <i>Euchlaena johnsonaria</i>           | UASM58447          | GWNS118-07  | HQ648070 | Canada        | Alberta          | Strickland Museum of Entomology, University of Alberta           |
| <i>Euchlaena johnsonaria</i>           | UASM58497          | GWNS120-07  | HQ648068 | Canada        | Alberta          | Strickland Museum of Entomology, University of Alberta           |
| <i>Euchlaena madusaria</i>             | CNLEP00033164      | GWNC165-07  | HQ648081 | Canada        | British Columbia | Canadian National Collection of Insects, Arachnids and Nematodes |
| <i>Euchlaena madusaria</i>             | ENT996-003813      | GWNR190-07  | HQ648086 | Canada        | British Columbia | Royal British Columbia Museum                                    |
| <i>Euchlaena madusaria</i>             | ENT996-003815      | GWNR191-07  | HQ648085 | Canada        | British Columbia | Royal British Columbia Museum                                    |
| <i>Euchlaena madusaria</i>             | UASM58366          | GWNS122-07  | HQ648083 | Canada        | Alberta          | Strickland Museum of Entomology, University of Alberta           |
| <i>Euchlaena madusaria</i>             | UASM58673          | GWNS121-07  | HQ648084 | Canada        | Alberta          | Strickland Museum of Entomology, University of Alberta           |
| <i>Euchlaena madusaria</i>             | UASM78420          | GWNS123-07  | HQ648082 | Canada        | Alberta          | Strickland Museum of Entomology, University of Alberta           |
| <i>Euchlaena marginaria</i>            | ENT002-001600      | GWNR193-07  | HQ648090 | Canada        | British Columbia | Royal British Columbia Museum                                    |
| <i>Euchlaena marginaria</i>            | ENT996-003812      | GWNR192-07  | HQ648091 | Canada        | British Columbia | Royal British Columbia Museum                                    |
| <i>Euchlaena marginaria</i>            | UASM57158          | GWNS124-07  | HQ648089 | Canada        | Alberta          | Strickland Museum of Entomology, University of Alberta           |
| <i>Euchlaena marginaria</i>            | UASM58233          | GWNS125-07  | HQ648088 | Canada        | Alberta          | Strickland Museum of Entomology, University of Alberta           |
| <i>Euchlaena marginaria</i>            | UASM7061           | GWNS126-07  | HQ648087 | Canada        | Alberta          | Strickland Museum of Entomology, University of Alberta           |
| <i>Euchlaena obtusaria</i>             | UASM41294          | GWNS116-07  | HQ648093 | Canada        | Alberta          | Strickland Museum of Entomology, University of Alberta           |
| <i>Euchlaena obtusaria</i>             | UASM41966          | GWNS117-07  | HQ648092 | Canada        | Alberta          | Strickland Museum of Entomology, University of Alberta           |
| <i>Euchlaena tigrinaria</i>            | ENT002-001601      | GWNR197-07  | HQ648096 | Canada        | British Columbia | Royal British Columbia Museum                                    |
| <i>Euchlaena tigrinaria</i>            | ENT996-003830      | GWNR195-07  | HQ648097 | Canada        | British Columbia | Royal British Columbia Museum                                    |
| <i>Euchlaena tigrinaria</i>            | ENT996-007448      | GWNR194-07  | HQ648098 | Canada        | British Columbia | Royal British Columbia Museum                                    |
| <i>Euchlaena tigrinaria</i>            | UASM57958          | GWNS127-07  | HQ648095 | Canada        | Alberta          | Strickland Museum of Entomology, University of Alberta           |
| <i>Euchlaena tigrinaria</i>            | UASM7062           | GWNS128-07  | HQ648094 | Canada        | Alberta          | Strickland Museum of Entomology, University of Alberta           |
| <i>Eudrepanulatrix rectifascia</i>     | 08-JDWBC-1062      | LBCG1062-09 | HQ648102 | Canada        | British Columbia | Spencer Entomological Museum, UBC                                |
| <i>Eudrepanulatrix rectifascia</i>     | 08-JDWBC-1086      | LBCG1086-09 | HQ648101 | Canada        | British Columbia | Spencer Entomological Museum, UBC                                |
| <i>Eudrepanulatrix rectifascia</i>     | 08-JDWBC-1094      | LBCG1094-09 | HQ648100 | Canada        | British Columbia | Spencer Entomological Museum, UBC                                |
| <i>Eudrepanulatrix rectifascia</i>     | CNLEP00033139      | GWNC140-07  | HQ648099 | Canada        | British Columbia | Canadian National Collection of Insects, Arachnids and Nematodes |
| <i>Eudrepanulatrix rectifascia</i>     | ENT996-003756      | GWNR172-07  | HQ648103 | United States | Washington       | Royal British Columbia Museum                                    |
| <i>Eufidonia convergaria</i>           | PF-2007-0364       | GWNP154-07  | HQ648107 | Canada        | British Columbia | Pacific Forestry Centre, Canadian Forest Service                 |
| <i>Eufidonia convergaria</i>           | PF-2007-0365       | GWNP155-07  | HQ648106 | Canada        | British Columbia | Pacific Forestry Centre, Canadian Forest Service                 |
| <i>Eufidonia convergaria</i>           | UASM24862          | GWNS086-07  | HQ648105 | Canada        | Alberta          | Strickland Museum of Entomology, University of Alberta           |
| <i>Eufidonia convergaria</i>           | UASM41707          | GWNS087-07  | HQ648104 | Canada        | Alberta          | Strickland Museum of Entomology, University of Alberta           |
| <i>Eufidonia discospilata</i>          | CNLEP00033360      | GWNC361-07  | HQ648108 | Canada        | Alberta          | Canadian National Collection of Insects, Arachnids and Nematodes |
| <i>Eufidonia discospilata</i>          | ENT002-001547      | GWNR118-07  | HQ648112 | Canada        | British Columbia | Royal British Columbia Museum                                    |
| <i>Eufidonia discospilata</i>          | ENT002-001548      | GWNR117-07  | HQ648113 | Canada        | British Columbia | Royal British Columbia Museum                                    |
| <i>Eufidonia discospilata</i>          | PF-2007-0366       | GWNP156-07  | HQ648111 | Canada        | British Columbia | Pacific Forestry Centre, Canadian Forest Service                 |
| <i>Eufidonia discospilata</i>          | UASM53042          | GWNS089-07  | HQ648109 | Canada        | Alberta          | Strickland Museum of Entomology, University of Alberta           |
| <i>Eufidonia discospilata</i>          | UASM53045          | GWNS088-07  | HQ648110 | Canada        | Alberta          | Strickland Museum of Entomology, University of Alberta           |
| <i>Eulithis destinata</i>              | CNLEP00033382      | GWNC383-07  | HQ648120 | Canada        | Alberta          | Canadian National Collection of Insects, Arachnids and Nematodes |
| <i>Eulithis destinata</i>              | CNLEP00033383      | GWNC384-07  | HQ648115 | Canada        | British Columbia | Canadian National Collection of Insects, Arachnids and Nematodes |
| <i>Eulithis destinata</i>              | CNLEP00033419      | GWNC420-07  | HQ648119 | United States | Alaska           | Canadian National Collection of Insects, Arachnids and Nematodes |
| <i>Eulithis destinata</i>              | CNLEP00033420      | GWNC421-07  | HQ648116 | Canada        | Yukon Territory  | Canadian National Collection of Insects, Arachnids and Nematodes |
| <i>Eulithis destinata</i>              | CNLEP00033421      | GWNC422-07  | HQ648118 | United States | Alaska           | Canadian National Collection of Insects, Arachnids and Nematodes |
| <i>Eulithis destinata</i>              | CNLEP00033423      | GWNC424-07  | HQ648117 | United States | Washington       | Canadian National Collection of Insects, Arachnids and Nematodes |
| <i>Eulithis destinata</i>              | Dun-08-070         | DUNLP070-08 | HQ648114 | Canada        | British Columbia | Pacific Forestry Centre, Canadian Forest Service                 |

|                                |                   |             |          |               |                  |                                                                  |
|--------------------------------|-------------------|-------------|----------|---------------|------------------|------------------------------------------------------------------|
| <i>Eulithis destinata</i>      | ENT987-001242     | GWNR457-07  | HQ648124 | Canada        | British Columbia | Royal British Columbia Museum                                    |
| <i>Eulithis destinata</i>      | ENT991-131361     | GWNR456-07  | HQ648125 | Canada        | British Columbia | Royal British Columbia Museum                                    |
| <i>Eulithis destinata</i>      | JECW-07-0136      | GWNJ136-07  | HQ648121 | United States | Washington       | James Entomological Collection, Washington State University      |
| <i>Eulithis destinata</i>      | FFC-2007-0283     | GWNP076-07  | HQ648123 | Canada        | British Columbia | Pacific Forestry Centre, Canadian Forest Service                 |
| <i>Eulithis destinata</i>      | FFC-2007-0284     | GWNP077-07  | HQ648122 | Canada        | British Columbia | Pacific Forestry Centre, Canadian Forest Service                 |
| <i>Eulithis explanata</i>      | CNCLEP00033384    | GWNC385-07  | HQ648127 | Canada        | Alberta          | Canadian National Collection of Insects, Arachnids and Nematodes |
| <i>Eulithis explanata</i>      | CNCLEP00033385    | GWNC386-07  | HQ648126 | Canada        | Alberta          | Canadian National Collection of Insects, Arachnids and Nematodes |
| <i>Eulithis explanata</i>      | UASM41842         | GWNS304-07  | HQ648131 | Canada        | Alberta          | Strickland Museum of Entomology, University of Alberta           |
| <i>Eulithis explanata</i>      | UASM41843         | GWNS303-07  | HQ648132 | Canada        | Alberta          | Strickland Museum of Entomology, University of Alberta           |
| <i>Eulithis explanata</i>      | UASM7350          | GWNS306-07  | HQ648129 | Canada        | Alberta          | Strickland Museum of Entomology, University of Alberta           |
| <i>Eulithis explanata</i>      | UASM7376          | GWNS305-07  | HQ648130 | Canada        | Alberta          | Strickland Museum of Entomology, University of Alberta           |
| <i>Eulithis explanata</i>      | UASM95854         | GWNS520-07  | HQ648128 | Canada        | Alberta          | Strickland Museum of Entomology, University of Alberta           |
| <i>Eulithis flavibrunnata</i>  | CNCLEP00033386    | GWNC387-07  | HQ648134 | Canada        | Alberta          | Canadian National Collection of Insects, Arachnids and Nematodes |
| <i>Eulithis flavibrunnata</i>  | CNCLEP00033387    | GWNC388-07  | HQ648133 | Canada        | Alberta          | Canadian National Collection of Insects, Arachnids and Nematodes |
| <i>Eulithis flavibrunnata</i>  | UASM7328          | GWNS302-07  | HQ648135 | Canada        | Alberta          | Strickland Museum of Entomology, University of Alberta           |
| <i>Eulithis propulsata</i>     | 08-JDWBC-0771     | LBCG771-09  | HQ648144 | Canada        | British Columbia | Spencer Entomological Museum, UBC                                |
| <i>Eulithis propulsata</i>     | 08-JDWBC-1841     | LBCG1841-09 | HQ648145 | Canada        | British Columbia | Spencer Entomological Museum, UBC                                |
| <i>Eulithis propulsata</i>     | CNCLEP00033416    | GWNC417-07  | HQ648136 | Canada        | Alberta          | Canadian National Collection of Insects, Arachnids and Nematodes |
| <i>Eulithis propulsata</i>     | ENT002-001697     | GWNR459-07  | HQ648142 | Canada        | British Columbia | Royal British Columbia Museum                                    |
| <i>Eulithis propulsata</i>     | ENT996-004698     | GWNR458-07  | HQ648143 | Canada        | British Columbia | Royal British Columbia Museum                                    |
| <i>Eulithis propulsata</i>     | FFC-2007-0282     | GWNP075-07  | HQ648137 | Canada        | British Columbia | Pacific Forestry Centre, Canadian Forest Service                 |
| <i>Eulithis propulsata</i>     | UASM43259         | GWNS296-07  | HQ648139 | Canada        | Alberta          | Strickland Museum of Entomology, University of Alberta           |
| <i>Eulithis propulsata</i>     | UASM57960         | GWNS294-07  | HQ648141 | Canada        | Alberta          | Strickland Museum of Entomology, University of Alberta           |
| <i>Eulithis propulsata</i>     | UASM58361         | GWNS295-07  | HQ648140 | Canada        | Alberta          | Strickland Museum of Entomology, University of Alberta           |
| <i>Eulithis propulsata</i>     | UASM7336          | GWNS297-07  | HQ648138 | Canada        | Alberta          | Strickland Museum of Entomology, University of Alberta           |
| <i>Eulithis testata</i>        | ENT002-001699     | GWNR460-07  | HQ648150 | Canada        | British Columbia | Royal British Columbia Museum                                    |
| <i>Eulithis testata</i>        | UASM28796         | GWNS301-07  | HQ648146 | Canada        | Alberta          | Strickland Museum of Entomology, University of Alberta           |
| <i>Eulithis testata</i>        | UASM58365         | GWNS300-07  | HQ648147 | Canada        | Alberta          | Strickland Museum of Entomology, University of Alberta           |
| <i>Eulithis testata</i>        | UASM58861         | GWNS298-07  | HQ648149 | Canada        | Alberta          | Strickland Museum of Entomology, University of Alberta           |
| <i>Eulithis testata</i>        | UASM7320          | GWNS299-07  | HQ648148 | Canada        | Alberta          | Strickland Museum of Entomology, University of Alberta           |
| <i>Eulithis xyliina</i>        | 08-JDWBC-2323     | LBCG2323-09 | HQ648162 | Canada        | British Columbia | Spencer Entomological Museum, UBC                                |
| <i>Eulithis xyliina</i>        | 08-JDWBC-2325     | LBCG2325-09 | HQ648163 | Canada        | British Columbia | Spencer Entomological Museum, UBC                                |
| <i>Eulithis xyliina</i>        | 08-JDWBC-2326     | LBCG2326-09 | HQ648164 | Canada        | British Columbia | Spencer Entomological Museum, UBC                                |
| <i>Eulithis xyliina</i>        | 08-JDWBC-2329     | LBCG2329-09 | HQ648165 | Canada        | British Columbia | Spencer Entomological Museum, UBC                                |
| <i>Eulithis xyliina</i>        | 08-JDWBC-2331     | LBCG2331-09 | HQ648166 | Canada        | British Columbia | Spencer Entomological Museum, UBC                                |
| <i>Eulithis xyliina</i>        | 08-JDWBC-3699     | LBCG3699-09 | HQ648167 | Canada        | British Columbia | Royal British Columbia Museum                                    |
| <i>Eulithis xyliina</i>        | CNCLEP00033418    | GWNC419-07  | HQ648151 | Canada        | Yukon Territory  | Canadian National Collection of Insects, Arachnids and Nematodes |
| <i>Eulithis xyliina</i>        | ENT996-004649     | GWNR463-07  | HQ648160 | Canada        | British Columbia | Royal British Columbia Museum                                    |
| <i>Eulithis xyliina</i>        | ENT996-004701     | GWNR464-07  | HQ648159 | Canada        | British Columbia | Royal British Columbia Museum                                    |
| <i>Eulithis xyliina</i>        | ENT996-004713     | GWNR462-07  | HQ648161 | Canada        | British Columbia | Royal British Columbia Museum                                    |
| <i>Eulithis xyliina</i>        | JECW-07-0137      | GWNJ137-07  | HQ648152 | United States | Washington       | James Entomological Collection, Washington State University      |
| <i>Eulithis xyliina</i>        | FFC-2007-0285     | GWNP078-07  | HQ648155 | Canada        | British Columbia | Pacific Forestry Centre, Canadian Forest Service                 |
| <i>Eulithis xyliina</i>        | FFC-2007-0286     | GWNP079-07  | HQ648156 | Canada        | British Columbia | Pacific Forestry Centre, Canadian Forest Service                 |
| <i>Eulithis xyliina</i>        | UASM24918         | GWNS309-07  | HQ648154 | Canada        | Alberta          | Strickland Museum of Entomology, University of Alberta           |
| <i>Eulithis xyliina</i>        | UASM7335          | GWNS307-07  | HQ648158 | Canada        | Alberta          | Strickland Museum of Entomology, University of Alberta           |
| <i>Eulithis xyliina</i>        | UASM7401          | GWNS308-07  | HQ648157 | Canada        | Alberta          | Strickland Museum of Entomology, University of Alberta           |
| <i>Eulithis xyliina</i>        | UASM95857         | GWNS518-07  | HQ648153 | Canada        | Alberta          | Strickland Museum of Entomology, University of Alberta           |
| <i>Eumacaria latiferrugata</i> | 08-JDWBC-0123     | LBCG123-08  | HQ648170 | Canada        | British Columbia | Spencer Entomological Museum, UBC                                |
| <i>Eumacaria latiferrugata</i> | 08-JDWBC-0129     | LBCG129-08  | HQ648169 | Canada        | British Columbia | Spencer Entomological Museum, UBC                                |
| <i>Eumacaria latiferrugata</i> | UASM24114         | GWNS007-07  | HQ648168 | Canada        | Alberta          | Strickland Museum of Entomology, University of Alberta           |
| <i>Euphyia intermediata</i>    | CNCLEP00033335    | GWNC336-07  | HQ648173 | Canada        | Alberta          | Canadian National Collection of Insects, Arachnids and Nematodes |
| <i>Euphyia intermediata</i>    | CNCLEP00033336    | GWNC337-07  | HQ648172 | Canada        | Alberta          | Canadian National Collection of Insects, Arachnids and Nematodes |
| <i>Euphyia intermediata</i>    | CNCLEP00034074    | GWNC512-07  | HQ648171 | Canada        | British Columbia | Canadian National Collection of Insects, Arachnids and Nematodes |
| <i>Euphyia intermediata</i>    | ENT996-007806     | GWNR640-07  | HQ648181 | Canada        | British Columbia | Royal British Columbia Museum                                    |
| <i>Euphyia intermediata</i>    | ENT996-007807     | GWNR641-07  | HQ648180 | Canada        | British Columbia | Royal British Columbia Museum                                    |
| <i>Euphyia intermediata</i>    | ENT996-007808     | GWNR642-07  | HQ648179 | Canada        | British Columbia | Royal British Columbia Museum                                    |
| <i>Euphyia intermediata</i>    | JECW-07-0161      | GWNJ161-07  | HQ648177 | United States | Washington       | James Entomological Collection, Washington State University      |
| <i>Euphyia intermediata</i>    | UASM7022          | GWNS392-07  | HQ648176 | Canada        | Alberta          | Strickland Museum of Entomology, University of Alberta           |
| <i>Euphyia intermediata</i>    | UASM7353          | GWNS386-07  | HQ648174 | Canada        | Alberta          | Strickland Museum of Entomology, University of Alberta           |
| <i>Euphyia intermediata</i>    | UASM7360          | GWNS385-07  | HQ648175 | Canada        | Alberta          | Strickland Museum of Entomology, University of Alberta           |
| <i>Euphyia intermediata</i>    | UASM78454         | GWNS578-07  | HQ648178 | Canada        | Alberta          | Strickland Museum of Entomology, University of Alberta           |
| <i>Eupithecia absinthiata</i>  | CGWC-2612         | LOWCC732-05 | HQ648184 | Canada        | British Columbia | Biodiversity Institute of Ontario                                |
| <i>Eupithecia absinthiata</i>  | HLC-22131         | LBCCC251-05 | HQ648183 | Canada        | British Columbia | Biodiversity Institute of Ontario                                |
| <i>Eupithecia absinthiata</i>  | HLC-22146         | LBCCC266-05 | HQ648182 | Canada        | British Columbia | Biodiversity Institute of Ontario                                |
| <i>Eupithecia absinthiata</i>  | UASM58790         | GWNS587-07  | HQ648186 | Canada        | Alberta          | Strickland Museum of Entomology, University of Alberta           |
| <i>Eupithecia absinthiata</i>  | UASM59018         | GWNS442-07  | HQ648185 | Canada        | Alberta          | Strickland Museum of Entomology, University of Alberta           |
| <i>Eupithecia agnesata</i>     | CNCLEP00035449    | GWNC683-07  | HQ648187 | United States | California       | Canadian National Collection of Insects, Arachnids and Nematodes |
| <i>Eupithecia albicapitata</i> | UASM41222         | GWNS465-07  | HQ648188 | Canada        | Alberta          | Strickland Museum of Entomology, University of Alberta           |
| <i>Eupithecia albicapitata</i> | UASM41223         | GWNS464-07  | HQ648189 | Canada        | Alberta          | Strickland Museum of Entomology, University of Alberta           |
| <i>Eupithecia albicapitata</i> | UASM58007         | GWNS463-07  | HQ648190 | Canada        | Alberta          | Strickland Museum of Entomology, University of Alberta           |
| <i>Eupithecia annulata</i>     | 07-JDWBC-0054     | GWND046-07  | HQ648201 | Canada        | British Columbia | Royal British Columbia Museum                                    |
| <i>Eupithecia annulata</i>     | Dun-08-072        | DUNLP072-08 | HQ648200 | Canada        | British Columbia | Pacific Forestry Centre, Canadian Forest Service                 |
| <i>Eupithecia annulata</i>     | Dun-08-074        | DUNLP074-08 | HQ648199 | Canada        | British Columbia | Pacific Forestry Centre, Canadian Forest Service                 |
| <i>Eupithecia annulata</i>     | Dun-08-076        | DUNLP076-08 | HQ648198 | Canada        | British Columbia | Pacific Forestry Centre, Canadian Forest Service                 |
| <i>Eupithecia annulata</i>     | Dun-08-077        | DUNLP077-08 | HQ648197 | Canada        | British Columbia | Pacific Forestry Centre, Canadian Forest Service                 |
| <i>Eupithecia annulata</i>     | Dun-08-078        | DUNLP078-08 | HQ648196 | Canada        | British Columbia | Pacific Forestry Centre, Canadian Forest Service                 |
| <i>Eupithecia annulata</i>     | Dun-08-079        | DUNLP079-08 | HQ648195 | Canada        | British Columbia | Pacific Forestry Centre, Canadian Forest Service                 |
| <i>Eupithecia annulata</i>     | Dun-08-086        | DUNLP086-08 | HQ648194 | Canada        | British Columbia | Pacific Forestry Centre, Canadian Forest Service                 |
| <i>Eupithecia annulata</i>     | Dun-08-087        | DUNLP087-08 | HQ648193 | Canada        | British Columbia | Pacific Forestry Centre, Canadian Forest Service                 |
| <i>Eupithecia annulata</i>     | Dun-08-088        | DUNLP088-08 | HQ648192 | Canada        | British Columbia | Pacific Forestry Centre, Canadian Forest Service                 |
| <i>Eupithecia annulata</i>     | Dun-08-089        | DUNLP089-08 | HQ648191 | Canada        | British Columbia | Pacific Forestry Centre, Canadian Forest Service                 |
| <i>Eupithecia annulata</i>     | FFC-2007-0260     | GWNP053-07  | HQ648204 | Canada        | British Columbia | Pacific Forestry Centre, Canadian Forest Service                 |
| <i>Eupithecia annulata</i>     | UASM59011         | GWNS455-07  | HQ648203 | Canada        | Alberta          | Strickland Museum of Entomology, University of Alberta           |
| <i>Eupithecia annulata</i>     | UASM59157         | GWNS456-07  | HQ648202 | Canada        | Alberta          | Strickland Museum of Entomology, University of Alberta           |
| <i>Eupithecia anticaria</i>    | HLC-20540         | LBCA540-05  | HQ648205 | Canada        | British Columbia | Biodiversity Institute of Ontario                                |
| <i>Eupithecia anticaria</i>    | UASM59014         | GWNS469-07  | HQ648206 | Canada        | Alberta          | Strickland Museum of Entomology, University of Alberta           |
| <i>Eupithecia anticaria</i>    | UASM59015         | GWNS467-07  | HQ648208 | Canada        | Alberta          | Strickland Museum of Entomology, University of Alberta           |
| <i>Eupithecia anticaria</i>    | UASM59016         | GWNS468-07  | HQ648207 | Canada        | Alberta          | Strickland Museum of Entomology, University of Alberta           |
| <i>Eupithecia anticaria</i>    | UASM59051         | GWNS439-07  | HQ648209 | Canada        | Alberta          | Strickland Museum of Entomology, University of Alberta           |
| <i>Eupithecia assimiliata</i>  | CGWC-2548         | LOWCC668-05 | HQ648212 | Canada        | British Columbia | Biodiversity Institute of Ontario                                |
| <i>Eupithecia assimiliata</i>  | CGWC-2560         | LOWCC680-05 | HQ648211 | Canada        | British Columbia | Biodiversity Institute of Ontario                                |
| <i>Eupithecia assimiliata</i>  | CGWC-2610         | LOWCC730-05 | HQ648210 | Canada        | British Columbia | Biodiversity Institute of Ontario                                |
| <i>Eupithecia assimiliata</i>  | NFRCP-2004-005558 | GWNN110-07  | HQ648213 | Canada        | Alberta          | Northern Forestry Centre, Canadian Forest Service                |
| <i>Eupithecia behrensata</i>   | CGWC-2676         | LOWCC796-05 | HQ648214 | Canada        | British Columbia | Biodiversity Institute of Ontario                                |
| <i>Eupithecia behrensata</i>   | UASM57502         | GWNS446-07  | HQ648216 | Canada        | Alberta          | Strickland Museum of Entomology, University of Alberta           |
| <i>Eupithecia behrensata</i>   | UASM57503         | GWNS445-07  | HQ648217 | Canada        | Alberta          | Strickland Museum of Entomology, University of Alberta           |
| <i>Eupithecia behrensata</i>   | UASM58370         | GWNS448-07  | HQ648215 | Canada        | Alberta          | Strickland Museum of Entomology, University of Alberta           |
| <i>Eupithecia borealis</i>     | 08-JDWBC-1396     | LBCG1396-09 | HQ648222 | Canada        | British Columbia | Spencer Entomological Museum, UBC                                |
| <i>Eupithecia borealis</i>     | CGWC-2591         | LOWCC711-05 | HQ648221 | Canada        | British Columbia | Biodiversity Institute of Ontario                                |
| <i>Eupithecia borealis</i>     | CGWC-2613         | LOWCC733-05 | HQ648220 | Canada        | British Columbia | Biodiversity Institute of Ontario                                |
| <i>Eupithecia borealis</i>     | CGWC-2635         | LOWCC755-05 | HQ648219 | Canada        | British Columbia | Biodiversity Institute of Ontario                                |
| <i>Eupithecia borealis</i>     | CGWC-2671         | LOWCC791-05 | HQ648218 | Canada        | British Columbia | Biodiversity Institute of Ontario                                |
| <i>Eupithecia bryanti</i>      | 08-JDWBC-0796     | LBCG796-09  | HQ648227 | Canada        | British Columbia | Spencer Entomological Museum, UBC                                |
| <i>Eupithecia bryanti</i>      | CNCLEP00034099    | GWNC537-07  | HQ648225 | Canada        | Yukon Territory  | Canadian National Collection of Insects, Arachnids and Nematodes |
| <i>Eupithecia bryanti</i>      | CNCLEP00034100    | GWNC538-07  | HQ648226 | United States | Alaska           | Canadian National Collection of Insects, Arachnids and Nematodes |
| <i>Eupithecia bryanti</i>      | HLC-22502         | LBCCC622-05 | HQ648224 | Canada        | British Columbia | Biodiversity Institute of Ontario                                |
| <i>Eupithecia bryanti</i>      | HLC-23473         | LBCDC653-05 | HQ648223 | Canada        | British Columbia | Biodiversity Institute of Ontario                                |



|                                      |                    |             |          |               |                  |                                                                  |
|--------------------------------------|--------------------|-------------|----------|---------------|------------------|------------------------------------------------------------------|
| <i>Eupithecia casloata</i>           | CNCLEP00034110     | GWNC548-07  | HQ648229 | Canada        | Yukon Territory  | Canadian National Collection of Insects, Arachnids and Nematodes |
| <i>Eupithecia casloata</i>           | HLC-21413          | LBCB473-05  | HQ648228 | Canada        | British Columbia | Biodiversity Institute of Ontario                                |
| <i>Eupithecia casloata</i>           | UASM41220          | GWNS435-07  | HQ648231 | Canada        | Alberta          | Strickland Museum of Entomology, University of Alberta           |
| <i>Eupithecia casloata</i>           | UASM78504          | GWNS436-07  | HQ648230 | Canada        | Alberta          | Strickland Museum of Entomology, University of Alberta           |
| <i>Eupithecia casloata</i>           | UASM78505          | GWNS434-07  | HQ648232 | Canada        | Alberta          | Strickland Museum of Entomology, University of Alberta           |
| <i>Eupithecia cimicifugata</i>       | UASM95846          | GWNS493-07  | HQ648233 | Canada        | Alberta          | Strickland Museum of Entomology, University of Alberta           |
| <i>Eupithecia coloradensis</i>       | UASM59026          | GWNS424-07  | HQ648234 | Canada        | Alberta          | Strickland Museum of Entomology, University of Alberta           |
| <i>Eupithecia columbiata</i>         | UASM57330          | GWNS491-07  | HQ648235 | Canada        | Alberta          | Strickland Museum of Entomology, University of Alberta           |
| <i>Eupithecia columbiata</i>         | UASM57332          | GWNS441-07  | HQ648236 | Canada        | Alberta          | Strickland Museum of Entomology, University of Alberta           |
| <i>Eupithecia columbiata</i>         | UASM57978          | GWNS419-07  | HQ648239 | Canada        | Alberta          | Strickland Museum of Entomology, University of Alberta           |
| <i>Eupithecia columbiata</i>         | UASM57980          | GWNS420-07  | HQ648238 | Canada        | Alberta          | Strickland Museum of Entomology, University of Alberta           |
| <i>Eupithecia columbiata</i>         | UASM58002          | GWNS421-07  | HQ648237 | Canada        | Alberta          | Strickland Museum of Entomology, University of Alberta           |
| <i>Eupithecia cretacea</i>           | CNCLEP00034116     | GWNC554-07  | HQ648242 | Canada        | Yukon Territory  | Canadian National Collection of Insects, Arachnids and Nematodes |
| <i>Eupithecia cretacea</i>           | ENT002-002426      | GWNR603-07  | HQ648244 | Canada        | British Columbia | Royal British Columbia Museum                                    |
| <i>Eupithecia cretacea</i>           | HLC-21677          | LBCB737-05  | HQ648241 | Canada        | British Columbia | Biodiversity Institute of Ontario                                |
| <i>Eupithecia cretacea</i>           | HLC-22897          | LBCD077-05  | HQ648240 | Canada        | British Columbia | Biodiversity Institute of Ontario                                |
| <i>Eupithecia cretacea</i>           | UASM95876          | GWNS547-07  | HQ648243 | Canada        | Alberta          | Strickland Museum of Entomology, University of Alberta           |
| <i>Eupithecia gelidata</i>           | UASM41224          | GWNS438-07  | HQ648246 | Canada        | Alberta          | Strickland Museum of Entomology, University of Alberta           |
| <i>Eupithecia gelidata</i>           | UASM41225          | GWNS449-07  | HQ648245 | Canada        | Alberta          | Strickland Museum of Entomology, University of Alberta           |
| <i>Eupithecia gilvippennata</i>      | CNCLEP00035456     | GWNC690-07  | HQ648248 | Canada        | British Columbia | Canadian National Collection of Insects, Arachnids and Nematodes |
| <i>Eupithecia gilvippennata</i>      | CNCLEP00035457     | GWNC691-07  | HQ648247 | Canada        | British Columbia | Canadian National Collection of Insects, Arachnids and Nematodes |
| <i>Eupithecia graefii</i>            | CBCC1094           | GWNS471-07  | HQ648252 | Canada        | Alberta          | Strickland Museum of Entomology, University of Alberta           |
| <i>Eupithecia graefii</i>            | HLC-20921          | LBCA921-05  | HQ648251 | Canada        | British Columbia | Biodiversity Institute of Ontario                                |
| <i>Eupithecia graefii</i>            | HLC-21321          | LBCB381-05  | HQ648250 | Canada        | British Columbia | Biodiversity Institute of Ontario                                |
| <i>Eupithecia graefii</i>            | HLC-21487          | LBCB547-05  | HQ648249 | Canada        | British Columbia | Biodiversity Institute of Ontario                                |
| <i>Eupithecia graefii</i>            | UASM59177          | GWNS470-07  | HQ648253 | Canada        | Alberta          | Strickland Museum of Entomology, University of Alberta           |
| <i>Eupithecia harrisonata</i>        | PF2007-02272       | GWNP065-07  | HQ648254 | Canada        | British Columbia | Pacific Forestry Centre, Canadian Forest Service                 |
| <i>Eupithecia interruptofasciata</i> | CGWC-1141          | LOWCB201-05 | HQ648258 | Canada        | British Columbia | Biodiversity Institute of Ontario                                |
| <i>Eupithecia interruptofasciata</i> | CGWC-1155          | LOWCB215-05 | HQ648257 | Canada        | British Columbia | Biodiversity Institute of Ontario                                |
| <i>Eupithecia interruptofasciata</i> | CGWC-1202          | LOWCB262-05 | HQ648256 | Canada        | British Columbia | Biodiversity Institute of Ontario                                |
| <i>Eupithecia interruptofasciata</i> | CGWC-1205          | LOWCB265-05 | HQ648255 | Canada        | British Columbia | Biodiversity Institute of Ontario                                |
| <i>Eupithecia interruptofasciata</i> | Dun-08-081         | DUNLP081-08 | HQ648259 | Canada        | British Columbia | Pacific Forestry Centre, Canadian Forest Service                 |
| <i>Eupithecia intricata</i>          | CGWC-4041          | LOWCE281-06 | HQ648260 | Canada        | British Columbia | Biodiversity Institute of Ontario                                |
| <i>Eupithecia johnstoni</i>          | 08-JDWBC-1138      | LBCG1138-09 | HQ648261 | Canada        | British Columbia | Spencer Entomological Museum, UBC                                |
| <i>Eupithecia lachrymosa</i>         | 08-JDWBC-3456      | LBCG3456-09 | HQ648273 | Canada        | British Columbia | Spencer Entomological Museum, UBC                                |
| <i>Eupithecia lachrymosa</i>         | 08-JDWBC-3458      | LBCG3458-09 | HQ648272 | Canada        | British Columbia | Spencer Entomological Museum, UBC                                |
| <i>Eupithecia lachrymosa</i>         | 08-JDWBC-3459      | LBCG3459-09 | HQ648271 | Canada        | British Columbia | Spencer Entomological Museum, UBC                                |
| <i>Eupithecia lachrymosa</i>         | 08-JDWBC-3460      | LBCG3460-09 | HQ648270 | Canada        | British Columbia | Spencer Entomological Museum, UBC                                |
| <i>Eupithecia lachrymosa</i>         | 08-JDWBC-3461      | LBCG3461-09 | HQ648269 | Canada        | British Columbia | Spencer Entomological Museum, UBC                                |
| <i>Eupithecia lachrymosa</i>         | 08-JDWBC-3462      | LBCG3462-09 | HQ648268 | Canada        | British Columbia | Spencer Entomological Museum, UBC                                |
| <i>Eupithecia lachrymosa</i>         | 08-JDWBC-3466      | LBCG3466-09 | HQ648267 | Canada        | British Columbia | Spencer Entomological Museum, UBC                                |
| <i>Eupithecia lachrymosa</i>         | CNCLEP00035443     | GWNC677-07  | HQ648262 | Canada        | British Columbia | Canadian National Collection of Insects, Arachnids and Nematodes |
| <i>Eupithecia lachrymosa</i>         | UASM58004          | GWNS459-07  | HQ648264 | Canada        | Alberta          | Strickland Museum of Entomology, University of Alberta           |
| <i>Eupithecia lachrymosa</i>         | UASM58269          | GWNS458-07  | HQ648265 | Canada        | Alberta          | Strickland Museum of Entomology, University of Alberta           |
| <i>Eupithecia lachrymosa</i>         | UASM59013          | GWNS460-07  | HQ648263 | Canada        | Alberta          | Strickland Museum of Entomology, University of Alberta           |
| <i>Eupithecia lachrymosa</i>         | UASM59036          | GWNS457-07  | HQ648266 | Canada        | Alberta          | Strickland Museum of Entomology, University of Alberta           |
| <i>Eupithecia lafontaineata</i>      | UASM59048          | GWNS425-07  | HQ648274 | Canada        | Alberta          | Strickland Museum of Entomology, University of Alberta           |
| <i>Eupithecia lariciata</i>          | Dun-08-090         | DUNLP090-08 | HQ648275 | Canada        | British Columbia | Pacific Forestry Centre, Canadian Forest Service                 |
| <i>Eupithecia lariciata</i>          | Dun-08-091         | DUNLP091-08 | HQ648276 | Canada        | British Columbia | Pacific Forestry Centre, Canadian Forest Service                 |
| <i>Eupithecia lariciata</i>          | Dun-08-092         | DUNLP092-08 | HQ648277 | Canada        | British Columbia | Pacific Forestry Centre, Canadian Forest Service                 |
| <i>Eupithecia lariciata</i>          | PF2007-02252       | GWNP045-07  | HQ648283 | Canada        | British Columbia | Pacific Forestry Centre, Canadian Forest Service                 |
| <i>Eupithecia lariciata</i>          | PF2007-02269       | GWNP062-07  | HQ648282 | Canada        | British Columbia | Pacific Forestry Centre, Canadian Forest Service                 |
| <i>Eupithecia lariciata</i>          | PF2007-02277       | GWNP070-07  | HQ648281 | Canada        | British Columbia | Pacific Forestry Centre, Canadian Forest Service                 |
| <i>Eupithecia lariciata</i>          | PF2007-02278       | GWNP071-07  | HQ648280 | Canada        | British Columbia | Pacific Forestry Centre, Canadian Forest Service                 |
| <i>Eupithecia lariciata</i>          | UASM58235          | GWNS430-07  | HQ648279 | Canada        | Alberta          | Strickland Museum of Entomology, University of Alberta           |
| <i>Eupithecia lariciata</i>          | UASM58236          | GWNS431-07  | HQ648278 | Canada        | Alberta          | Strickland Museum of Entomology, University of Alberta           |
| <i>Eupithecia longipalpata</i>       | CNCLEP00034091     | GWNC529-07  | HQ648286 | Canada        | British Columbia | Canadian National Collection of Insects, Arachnids and Nematodes |
| <i>Eupithecia longipalpata</i>       | Dun-08-075         | DUNLP075-08 | HQ648285 | Canada        | British Columbia | Pacific Forestry Centre, Canadian Forest Service                 |
| <i>Eupithecia longipalpata</i>       | Dun-08-080         | DUNLP080-08 | HQ648284 | Canada        | British Columbia | Pacific Forestry Centre, Canadian Forest Service                 |
| <i>Eupithecia longipalpata</i>       | PF2007-02256       | GWNP049-07  | HQ648287 | Canada        | British Columbia | Pacific Forestry Centre, Canadian Forest Service                 |
| <i>Eupithecia maestosa</i>           | HLC-23354          | LBCD534-05  | HQ648288 | Canada        | British Columbia | Biodiversity Institute of Ontario                                |
| <i>Eupithecia maestosa</i>           | PF2007-02276       | GWNP069-07  | HQ648289 | Canada        | British Columbia | Pacific Forestry Centre, Canadian Forest Service                 |
| <i>Eupithecia misturata</i>          | JECW-07-0179       | GWNJ179-07  | HQ648294 | United States | Washington       | James Entomological Collection, Washington State University      |
| <i>Eupithecia misturata</i>          | JECW-07-0180       | GWNJ180-07  | HQ648290 | United States | Idaho            | James Entomological Collection, Washington State University      |
| <i>Eupithecia misturata</i>          | JECW-07-0182       | GWNJ182-07  | HQ648293 | United States | Washington       | James Entomological Collection, Washington State University      |
| <i>Eupithecia misturata</i>          | UASM59023          | GWNS422-07  | HQ648292 | Canada        | Alberta          | Strickland Museum of Entomology, University of Alberta           |
| <i>Eupithecia misturata</i>          | UASM59050          | GWNS423-07  | HQ648291 | Canada        | Alberta          | Strickland Museum of Entomology, University of Alberta           |
| <i>Eupithecia mutata</i>             | CGWC-1220          | LOWCB280-05 | HQ648299 | Canada        | British Columbia | Biodiversity Institute of Ontario                                |
| <i>Eupithecia mutata</i>             | CGWC-2511          | LOWCC631-05 | HQ648298 | Canada        | British Columbia | Biodiversity Institute of Ontario                                |
| <i>Eupithecia mutata</i>             | CGWC-2563          | LOWCC683-05 | HQ648297 | Canada        | British Columbia | Biodiversity Institute of Ontario                                |
| <i>Eupithecia mutata</i>             | CGWC-2574          | LOWCC694-05 | HQ648296 | Canada        | British Columbia | Biodiversity Institute of Ontario                                |
| <i>Eupithecia mutata</i>             | HLC-23429          | LBCD609-05  | HQ648295 | Canada        | British Columbia | Biodiversity Institute of Ontario                                |
| <i>Eupithecia nevadata</i>           | 08-JDWBC-0325      | LBCG325-08  | HQ648304 | Canada        | British Columbia | Spencer Entomological Museum, UBC                                |
| <i>Eupithecia nevadata</i>           | CGWC-4019          | LOWCE259-06 | HQ648302 | Canada        | British Columbia | Biodiversity Institute of Ontario                                |
| <i>Eupithecia nevadata</i>           | CGWC-4024          | LOWCE264-06 | HQ648301 | Canada        | British Columbia | Biodiversity Institute of Ontario                                |
| <i>Eupithecia nevadata</i>           | CGWC-4193          | LOWCE433-06 | HQ648300 | Canada        | British Columbia | Biodiversity Institute of Ontario                                |
| <i>Eupithecia nevadata</i>           | UASM95835          | GWNS475-07  | HQ648303 | Canada        | British Columbia | Strickland Museum of Entomology, University of Alberta           |
| <i>Eupithecia nimbicolor</i>         | 08-JDWBC-0050      | LBCG050-08  | HQ648307 | Canada        | British Columbia | Spencer Entomological Museum, UBC                                |
| <i>Eupithecia nimbicolor</i>         | NFRP-P-2004-005102 | GWNN109-07  | HQ648305 | Canada        | Alberta          | Northern Forestry Centre, Canadian Forest Service                |
| <i>Eupithecia nimbicolor</i>         | UASM58237          | GWNS440-07  | HQ648306 | Canada        | Alberta          | Strickland Museum of Entomology, University of Alberta           |
| <i>Eupithecia nipadophilata</i>      | CNCLEP00035444     | GWNC678-07  | HQ648309 | Canada        | Alberta          | Canadian National Collection of Insects, Arachnids and Nematodes |
| <i>Eupithecia nipadophilata</i>      | Dun-08-073         | DUNLP073-08 | HQ648308 | Canada        | British Columbia | Pacific Forestry Centre, Canadian Forest Service                 |
| <i>Eupithecia nipadophilata</i>      | PF2007-02259       | GWNP052-07  | HQ648311 | Canada        | British Columbia | Pacific Forestry Centre, Canadian Forest Service                 |
| <i>Eupithecia nipadophilata</i>      | UASM59396          | GWNS476-07  | HQ648310 | Canada        | Alberta          | Strickland Museum of Entomology, University of Alberta           |
| <i>Eupithecia niveifascia</i>        | UASM59049          | GWNS462-07  | HQ648312 | Canada        | Alberta          | Strickland Museum of Entomology, University of Alberta           |
| <i>Eupithecia olivacea</i>           | 07-JDWBC-0001      | GWND001-07  | HQ648317 | Canada        | British Columbia | Royal British Columbia Museum                                    |
| <i>Eupithecia olivacea</i>           | CGWC-4042          | LOWCE282-06 | HQ648316 | Canada        | British Columbia | Biodiversity Institute of Ontario                                |
| <i>Eupithecia olivacea</i>           | CGWC-4044          | LOWCE284-06 | HQ648315 | Canada        | British Columbia | Biodiversity Institute of Ontario                                |
| <i>Eupithecia olivacea</i>           | CGWC-4047          | LOWCE287-06 | HQ648314 | Canada        | British Columbia | Biodiversity Institute of Ontario                                |
| <i>Eupithecia olivacea</i>           | CGWC-4048          | LOWCE288-06 | HQ648313 | Canada        | British Columbia | Biodiversity Institute of Ontario                                |
| <i>Eupithecia ornata</i>             | 08-JDWBC-3457      | LBCG3457-09 | HQ648323 | Canada        | British Columbia | Spencer Entomological Museum, UBC                                |
| <i>Eupithecia ornata</i>             | 08-JDWBC-3465      | LBCG3465-09 | HQ648322 | Canada        | British Columbia | Spencer Entomological Museum, UBC                                |
| <i>Eupithecia ornata</i>             | 08-JDWBC-3467      | LBCG3467-09 | HQ648321 | Canada        | British Columbia | Spencer Entomological Museum, UBC                                |
| <i>Eupithecia ornata</i>             | CNCLEP00034087     | GWNC525-07  | HQ648319 | Canada        | British Columbia | Canadian National Collection of Insects, Arachnids and Nematodes |
| <i>Eupithecia ornata</i>             | Dun-08-082         | DUNLP082-08 | HQ648318 | Canada        | British Columbia | Pacific Forestry Centre, Canadian Forest Service                 |
| <i>Eupithecia ornata</i>             | PF2007-02255       | GWNP048-07  | HQ648320 | Canada        | British Columbia | Pacific Forestry Centre, Canadian Forest Service                 |
| <i>Eupithecia palpata</i>            | Dun-08-071         | DUNLP071-08 | HQ648325 | Canada        | British Columbia | Pacific Forestry Centre, Canadian Forest Service                 |
| <i>Eupithecia palpata</i>            | Dun-08-083         | DUNLP083-08 | HQ648324 | Canada        | British Columbia | Pacific Forestry Centre, Canadian Forest Service                 |
| <i>Eupithecia palpata</i>            | UASM57999          | GWNS418-07  | HQ648326 | Canada        | Alberta          | Strickland Museum of Entomology, University of Alberta           |
| <i>Eupithecia perfusca</i>           | 08-JDWBC-3463      | LBCG3463-09 | HQ648329 | Canada        | British Columbia | Spencer Entomological Museum, UBC                                |
| <i>Eupithecia perfusca</i>           | 08-JDWBC-3464      | LBCG3464-09 | HQ648328 | Canada        | British Columbia | Spencer Entomological Museum, UBC                                |
| <i>Eupithecia perfusca</i>           | UASM59037          | GWNS452-07  | HQ648327 | Canada        | Alberta          | Strickland Museum of Entomology, University of Alberta           |
| <i>Eupithecia placidata</i>          | CGWC-2577          | LOWCC697-05 | HQ648332 | Canada        | British Columbia | Biodiversity Institute of Ontario                                |
| <i>Eupithecia placidata</i>          | CGWC-2596          | LOWCC716-05 | HQ648331 | Canada        | British Columbia | Biodiversity Institute of Ontario                                |
| <i>Eupithecia placidata</i>          | CGWC-2597          | LOWCC717-05 | HQ648330 | Canada        | British Columbia | Biodiversity Institute of Ontario                                |
| <i>Eupithecia placidata</i>          | Dun-08-084         | DUNLP084-08 | HQ648334 | Canada        | British Columbia | Pacific Forestry Centre, Canadian Forest Service                 |
| <i>Eupithecia placidata</i>          | Dun-08-085         | DUNLP085-08 | HQ648333 | Canada        | British Columbia | Pacific Forestry Centre, Canadian Forest Service                 |

|                                  |                    |             |          |               |                  |                                                                  |
|----------------------------------|--------------------|-------------|----------|---------------|------------------|------------------------------------------------------------------|
| <i>Eupithecia pseudotsugata</i>  | CGWC-2523          | LOWCC643-05 | HQ648337 | Canada        | British Columbia | Biodiversity Institute of Ontario                                |
| <i>Eupithecia pseudotsugata</i>  | CGWC-2524          | LOWCC644-05 | HQ648336 | Canada        | British Columbia | Biodiversity Institute of Ontario                                |
| <i>Eupithecia pseudotsugata</i>  | CGWC-2678          | LOWCC798-05 | HQ648335 | Canada        | British Columbia | Biodiversity Institute of Ontario                                |
| <i>Eupithecia pseudotsugata</i>  | UASM95841          | GWNS488-07  | HQ648339 | Canada        | British Columbia | Strickland Museum of Entomology, University of Alberta           |
| <i>Eupithecia pseudotsugata</i>  | UASM95842          | GWNS489-07  | HQ648338 | Canada        | British Columbia | Strickland Museum of Entomology, University of Alberta           |
| <i>Eupithecia pusillata</i>      | PFC-2007-0271      | GWNP064-07  | HQ648340 | Canada        | British Columbia | Pacific Forestry Centre, Canadian Forest Service                 |
| <i>Eupithecia ravocostaliata</i> | UASM57953          | GWNS473-07  | HQ648342 | Canada        | Alberta          | Strickland Museum of Entomology, University of Alberta           |
| <i>Eupithecia ravocostaliata</i> | UASM58049          | GWNS472-07  | HQ648343 | Canada        | Alberta          | Strickland Museum of Entomology, University of Alberta           |
| <i>Eupithecia ravocostaliata</i> | UASM7026           | GWNS474-07  | HQ648341 | Canada        | Alberta          | Strickland Museum of Entomology, University of Alberta           |
| <i>Eupithecia regina</i>         | CNCLP00034102      | GWNC540-07  | HQ648344 | Canada        | Saskatchewan     | Canadian National Collection of Insects, Arachnids and Nematodes |
| <i>Eupithecia rotundopuncta</i>  | 10-GOBL-07         | GOBL007-10  | HQ648345 | United States | Washington       | Barcode of Life Data System                                      |
| <i>Eupithecia rotundopuncta</i>  | UBC-2007-0034      | LBCS050-07  | FJ412550 | Canada        | British Columbia | Canadian National Collection of Insects, Arachnids and Nematodes |
| <i>Eupithecia rotundopuncta</i>  | UBC-2007-0037      | LBCS053-07  | FJ412549 | Canada        | British Columbia | Canadian National Collection of Insects, Arachnids and Nematodes |
| <i>Eupithecia russellata</i>     | CBCC1254           | GWNN111-07  | HQ648346 | Canada        | Alberta          | Northern Forestry Centre, Canadian Forest Service                |
| <i>Eupithecia russellata</i>     | NFRC-P-2004-005105 | GWNN107-07  | HQ648347 | Canada        | Alberta          | Northern Forestry Centre, Canadian Forest Service                |
| <i>Eupithecia satyrata</i>       | CGWC-2549          | LOWCC669-05 | HQ648350 | Canada        | British Columbia | Biodiversity Institute of Ontario                                |
| <i>Eupithecia satyrata</i>       | CGWC-2602          | LOWCC722-05 | HQ648349 | Canada        | British Columbia | Biodiversity Institute of Ontario                                |
| <i>Eupithecia satyrata</i>       | HLC-20139          | LBCA139-05  | HQ648348 | Canada        | British Columbia | Biodiversity Institute of Ontario                                |
| <i>Eupithecia satyrata</i>       | UASM53003          | GWNS437-07  | HQ648351 | Canada        | Alberta          | Strickland Museum of Entomology, University of Alberta           |
| <i>Eupithecia satyrata</i>       | UASM53004          | GWNS584-07  | HQ648352 | Canada        | Alberta          | Strickland Museum of Entomology, University of Alberta           |
| <i>Eupithecia sharronata</i>     | HLC-23390          | LBCD570-05  | HQ648353 | Canada        | British Columbia | Biodiversity Institute of Ontario                                |
| <i>Eupithecia sharronata</i>     | UASM53001          | GWNS432-07  | HQ648354 | Canada        | Alberta          | Strickland Museum of Entomology, University of Alberta           |
| <i>Eupithecia sp. 1</i>          | UASM57384          | GWNS451-07  | HQ648355 | Canada        | Alberta          | Strickland Museum of Entomology, University of Alberta           |
| <i>Eupithecia sp. 1</i>          | UASM59012          | GWNS450-07  | HQ648356 | Canada        | Alberta          | Strickland Museum of Entomology, University of Alberta           |
| <i>Eupithecia sp. 11</i>         | CGWC-2556          | LOWCC676-05 | HQ648360 | Canada        | British Columbia | Biodiversity Institute of Ontario                                |
| <i>Eupithecia sp. 11</i>         | CGWC-2571          | LOWCC691-05 | HQ648359 | Canada        | British Columbia | Biodiversity Institute of Ontario                                |
| <i>Eupithecia sp. 11</i>         | CGWC-2629          | LOWCC749-05 | HQ648358 | Canada        | British Columbia | Biodiversity Institute of Ontario                                |
| <i>Eupithecia sp. 11</i>         | CGWC-2647          | LOWCC767-05 | HQ648357 | Canada        | British Columbia | Biodiversity Institute of Ontario                                |
| <i>Eupithecia sp. 22</i>         | CGWC-1187          | LOWCB247-05 | HQ648365 | Canada        | British Columbia | Biodiversity Institute of Ontario                                |
| <i>Eupithecia sp. 22</i>         | CGWC-1191          | LOWCB251-05 | HQ648364 | Canada        | British Columbia | Biodiversity Institute of Ontario                                |
| <i>Eupithecia sp. 22</i>         | CGWC-1195          | LOWCB255-05 | HQ648363 | Canada        | British Columbia | Biodiversity Institute of Ontario                                |
| <i>Eupithecia sp. 22</i>         | CGWC-1198          | LOWCB258-05 | HQ648362 | Canada        | British Columbia | Biodiversity Institute of Ontario                                |
| <i>Eupithecia sp. 22</i>         | CGWC-1207          | LOWCB267-05 | HQ648361 | Canada        | British Columbia | Biodiversity Institute of Ontario                                |
| <i>Eupithecia sp. 4</i>          | UASM57329          | GWNS433-07  | HQ648368 | Canada        | Alberta          | Strickland Museum of Entomology, University of Alberta           |
| <i>Eupithecia sp. 4</i>          | UASM59141          | GWNS454-07  | HQ648366 | Canada        | Alberta          | Strickland Museum of Entomology, University of Alberta           |
| <i>Eupithecia sp. 4</i>          | UASM59156          | GWNS453-07  | HQ648367 | Canada        | Alberta          | Strickland Museum of Entomology, University of Alberta           |
| <i>Eupithecia spermaphaga</i>    | CNCLP00035453      | GWNC687-07  | HQ648369 | Canada        | British Columbia | Canadian National Collection of Insects, Arachnids and Nematodes |
| <i>Eupithecia spermaphaga</i>    | PFC-2007-0264      | GWNP057-07  | HQ648371 | Canada        | British Columbia | Pacific Forestry Centre, Canadian Forest Service                 |
| <i>Eupithecia spermaphaga</i>    | PFC-2007-0265      | GWNP058-07  | HQ648370 | Canada        | British Columbia | Pacific Forestry Centre, Canadian Forest Service                 |
| <i>Eupithecia stellata</i>       | NFRC-P-2003-000227 | GWNN091-07  | HQ648373 | Canada        | Alberta          | Northern Forestry Centre, Canadian Forest Service                |
| <i>Eupithecia stellata</i>       | UASM58008          | GWNS461-07  | HQ648372 | Canada        | Alberta          | Strickland Museum of Entomology, University of Alberta           |
| <i>Eupithecia subfuscata</i>     | CBCC1253           | GWNN112-07  | HQ648376 | Canada        | Alberta          | Northern Forestry Centre, Canadian Forest Service                |
| <i>Eupithecia subfuscata</i>     | CBCC1258           | GWNN113-07  | HQ648375 | Canada        | Alberta          | Northern Forestry Centre, Canadian Forest Service                |
| <i>Eupithecia subfuscata</i>     | JECW-07-0173       | GWNJ173-07  | HQ648384 | United States | Washington       | James Entomological Collection, Washington State University      |
| <i>Eupithecia subfuscata</i>     | NFRC-P-2003-000745 | GWNN097-07  | HQ648377 | Canada        | Alberta          | Northern Forestry Centre, Canadian Forest Service                |
| <i>Eupithecia subfuscata</i>     | PFC-2007-0250      | GWNP043-07  | HQ648383 | Canada        | British Columbia | Pacific Forestry Centre, Canadian Forest Service                 |
| <i>Eupithecia subfuscata</i>     | UASM59017          | GWNS466-07  | HQ648374 | Canada        | Alberta          | Strickland Museum of Entomology, University of Alberta           |
| <i>Eupithecia subfuscata</i>     | UASM59019          | GWNS428-07  | HQ648380 | Canada        | Alberta          | Strickland Museum of Entomology, University of Alberta           |
| <i>Eupithecia subfuscata</i>     | UASM59020          | GWNS427-07  | HQ648381 | Canada        | Alberta          | Strickland Museum of Entomology, University of Alberta           |
| <i>Eupithecia subfuscata</i>     | UASM59021          | GWNS429-07  | HQ648379 | Canada        | Alberta          | Strickland Museum of Entomology, University of Alberta           |
| <i>Eupithecia subfuscata</i>     | UASM78503          | GWNS426-07  | HQ648382 | Canada        | Alberta          | Strickland Museum of Entomology, University of Alberta           |
| <i>Eupithecia subfuscata</i>     | UASM95840          | GWNS492-07  | HQ648378 | Canada        | Alberta          | Strickland Museum of Entomology, University of Alberta           |
| <i>Eupithecia tenuata</i>        | CNCLP00035447      | GWNC681-07  | HQ648385 | United States | Colorado         | Canadian National Collection of Insects, Arachnids and Nematodes |
| <i>Eupithecia tripunctaria</i>   | HLC-20264          | LBCA264-05  | HQ648389 | Canada        | British Columbia | Biodiversity Institute of Ontario                                |
| <i>Eupithecia tripunctaria</i>   | HLC-20730          | LBCA730-05  | HQ648388 | Canada        | British Columbia | Biodiversity Institute of Ontario                                |
| <i>Eupithecia tripunctaria</i>   | HLC-21405          | LBCB465-05  | HQ648387 | Canada        | British Columbia | Biodiversity Institute of Ontario                                |
| <i>Eupithecia tripunctaria</i>   | HLC-23361          | LBCD541-05  | HQ648386 | Canada        | British Columbia | Biodiversity Institute of Ontario                                |
| <i>Eupithecia unicolor</i>       | Dun-08-093         | DUNLP093-08 | HQ648390 | Canada        | British Columbia | Pacific Forestry Centre, Canadian Forest Service                 |
| <i>Eurhinosea flavaria</i>       | CNCLP00033424      | GWNC425-07  | HQ648391 | Canada        | British Columbia | Canadian National Collection of Insects, Arachnids and Nematodes |
| <i>Eustroma atrifasciata</i>     | 08-JDWBC-0108      | LBCG108-08  | HQ648392 | Canada        | British Columbia | Spencer Entomological Museum, UBC                                |
| <i>Eustroma atrifasciata</i>     | CNCLP00033427      | GWNC428-07  | FJ376631 | Canada        | British Columbia | Canadian National Collection of Insects, Arachnids and Nematodes |
| <i>Eustroma fasciata</i>         | CNCLP00033426      | GWNC427-07  | FJ376632 | United States | Washington       | Canadian National Collection of Insects, Arachnids and Nematodes |
| <i>Eustroma fasciata</i>         | ENT991-006370      | GWNR465-07  | HQ648396 | Canada        | British Columbia | Royal British Columbia Museum                                    |
| <i>Eustroma fasciata</i>         | ENT996-004411      | GWNR466-07  | HQ648395 | Canada        | British Columbia | Royal British Columbia Museum                                    |
| <i>Eustroma fasciata</i>         | ENT996-004415      | GWNR467-07  | HQ648394 | United States | Washington       | Royal British Columbia Museum                                    |
| <i>Eustroma fasciata</i>         | HLC-22239          | LBCG359-05  | HQ648393 | Canada        | British Columbia | Biodiversity Institute of Ontario                                |
| <i>Eustroma semiatrata</i>       | 08-JDWBC-0741      | LBCG741-09  | HQ648401 | Canada        | British Columbia | Spencer Entomological Museum, UBC                                |
| <i>Eustroma semiatrata</i>       | 08-JDWBC-1835      | LBCG1835-09 | HQ648403 | Canada        | British Columbia | Spencer Entomological Museum, UBC                                |
| <i>Eustroma semiatrata</i>       | 08-JDWBC-1836      | LBCG1836-09 | HQ648402 | Canada        | British Columbia | Spencer Entomological Museum, UBC                                |
| <i>Eustroma semiatrata</i>       | 08-JDWBC-2116      | LBCG2116-09 | HQ648405 | Canada        | British Columbia | Spencer Entomological Museum, UBC                                |
| <i>Eustroma semiatrata</i>       | 08-JDWBC-3691      | LBCG3691-09 | HQ648404 | Canada        | British Columbia | Royal British Columbia Museum                                    |
| <i>Eustroma semiatrata</i>       | CNCLP00033311      | GWNC312-07  | HQ648397 | Canada        | Alberta          | Canadian National Collection of Insects, Arachnids and Nematodes |
| <i>Eustroma semiatrata</i>       | JECW-07-0135       | GWNJ135-07  | HQ648398 | United States | Washington       | James Entomological Collection, Washington State University      |
| <i>Eustroma semiatrata</i>       | UASM41389          | GWNS310-07  | HQ648400 | Canada        | Alberta          | Strickland Museum of Entomology, University of Alberta           |
| <i>Eustroma semiatrata</i>       | UASM77890          | GWNS311-07  | HQ648399 | Canada        | Alberta          | Strickland Museum of Entomology, University of Alberta           |
| <i>Gabriola dyari</i>            | 08-JDWBC-0201      | LBCG201-08  | HQ648412 | Canada        | British Columbia | Spencer Entomological Museum, UBC                                |
| <i>Gabriola dyari</i>            | 08-JDWBC-2316      | LBCG2316-09 | HQ648413 | Canada        | British Columbia | Spencer Entomological Museum, UBC                                |
| <i>Gabriola dyari</i>            | 08-JDWBC-2317      | LBCG2317-09 | HQ648414 | Canada        | British Columbia | Spencer Entomological Museum, UBC                                |
| <i>Gabriola dyari</i>            | Dun-08-095         | DUNLP095-08 | HQ648406 | Canada        | British Columbia | Pacific Forestry Centre, Canadian Forest Service                 |
| <i>Gabriola dyari</i>            | ENT996-003894      | GWNR218-07  | HQ648419 | Canada        | British Columbia | Royal British Columbia Museum                                    |
| <i>Gabriola dyari</i>            | ENT996-003895      | GWNR222-07  | HQ648415 | Canada        | British Columbia | Royal British Columbia Museum                                    |
| <i>Gabriola dyari</i>            | ENT996-003896      | GWNR221-07  | HQ648416 | Canada        | British Columbia | Royal British Columbia Museum                                    |
| <i>Gabriola dyari</i>            | ENT996-003898      | GWNR219-07  | HQ648418 | Canada        | British Columbia | Royal British Columbia Museum                                    |
| <i>Gabriola dyari</i>            | ENT996-003904      | GWNR220-07  | HQ648417 | Canada        | British Columbia | Royal British Columbia Museum                                    |
| <i>Gabriola dyari</i>            | JD1917             | GWNS152-07  | HQ648408 | Canada        | British Columbia | Strickland Museum of Entomology, University of Alberta           |
| <i>Gabriola dyari</i>            | JECW-07-0074       | GWNJ074-07  | HQ648407 | United States | Washington       | James Entomological Collection, Washington State University      |
| <i>Gabriola dyari</i>            | PFC-2007-0383      | GWNP173-07  | HQ648411 | Canada        | British Columbia | Pacific Forestry Centre, Canadian Forest Service                 |
| <i>Gabriola dyari</i>            | WFBM-07-0050       | GWNN050-07  | HQ648410 | United States | Idaho            | University of Idaho, W. F. Barr Entomological Collection         |
| <i>Gabriola dyari</i>            | WFBM-07-0051       | GWNN051-07  | HQ648409 | United States | Idaho            | University of Idaho, W. F. Barr Entomological Collection         |
| <i>Gabriola dyari</i>            | WFBM-07-0024       | GWNN024-07  | HQ648420 | United States | Idaho            | University of Idaho, W. F. Barr Entomological Collection         |
| <i>Glena nigricaria</i>          | 08-JDWBC-0411      | LBCG411-08  | HQ648425 | Canada        | British Columbia | Spencer Entomological Museum, UBC                                |
| <i>Glena nigricaria</i>          | 08-JDWBC-0417      | LBCG417-08  | HQ648424 | Canada        | British Columbia | Spencer Entomological Museum, UBC                                |
| <i>Glena nigricaria</i>          | CGWC-0982          | LOWCB042-05 | HQ648422 | Canada        | British Columbia | Biodiversity Institute of Ontario                                |
| <i>Glena nigricaria</i>          | Dun-08-096         | DUNLP096-08 | HQ648421 | Canada        | British Columbia | Pacific Forestry Centre, Canadian Forest Service                 |
| <i>Glena nigricaria</i>          | ENT996-003448      | GWNR093-07  | HQ648423 | Canada        | British Columbia | Royal British Columbia Museum                                    |
| <i>Gnophos macguffini</i>        | CNCLP00033103      | GWNC104-07  | HQ648430 | Canada        | Yukon Territory  | Canadian National Collection of Insects, Arachnids and Nematodes |
| <i>Gnophos macguffini</i>        | CNCLP00033104      | GWNC105-07  | HQ648429 | Canada        | Yukon Territory  | Canadian National Collection of Insects, Arachnids and Nematodes |
| <i>Gnophos macguffini</i>        | CNCLP00033105      | GWNC106-07  | HQ648428 | Canada        | British Columbia | Canadian National Collection of Insects, Arachnids and Nematodes |
| <i>Gnophos macguffini</i>        | CNCLP00033308      | GWNC309-07  | HQ648427 | Canada        | British Columbia | Canadian National Collection of Insects, Arachnids and Nematodes |
| <i>Gnophos macguffini</i>        | CNCLP00033309      | GWNC310-07  | HQ648426 | Canada        | British Columbia | Canadian National Collection of Insects, Arachnids and Nematodes |
| <i>Gnophos macguffini</i>        | SEM-UBC-GE0-0094   | GWNU052-07  | HQ648431 | Canada        | Yukon Territory  | Spencer Entomological Museum, UBC                                |
| <i>Haematopsis grataria</i>      | CNCLP00033334      | GWNC335-07  | HQ648432 | Canada        | Alberta          | Canadian National Collection of Insects, Arachnids and Nematodes |
| <i>Haematopsis grataria</i>      | UASM41553          | GWNS249-07  | HQ648434 | Canada        | Alberta          | Strickland Museum of Entomology, University of Alberta           |
| <i>Haematopsis grataria</i>      | UASM58991          | GWNS250-07  | HQ648433 | Canada        | Alberta          | Strickland Museum of Entomology, University of Alberta           |
| <i>Hemithea aestivaria</i>       | CNCLP00021545      | GWNC459-07  | HQ648438 | Canada        | British Columbia | Canadian National Collection of Insects, Arachnids and Nematodes |
| <i>Hemithea aestivaria</i>       | CNCLP00021546      | GWNC460-07  | HQ648437 | Canada        | British Columbia | Canadian National Collection of Insects, Arachnids and Nematodes |
| <i>Hemithea aestivaria</i>       | CNCLP00021547      | GWNC461-07  | HQ648436 | Canada        | British Columbia | Canadian National Collection of Insects, Arachnids and Nematodes |

|                                 |                 |             |          |               |                  |                                                                  |
|---------------------------------|-----------------|-------------|----------|---------------|------------------|------------------------------------------------------------------|
| <i>Hemithea aestivaria</i>      | Dun-08-097      | DUNLP097-08 | HQ648435 | Canada        | British Columbia | Pacific Forestry Centre, Canadian Forest Service                 |
| <i>Hemithea aestivaria</i>      | ENT006-000228   | GWNR350-07  | HQ648447 | Canada        | British Columbia | Royal British Columbia Museum                                    |
| <i>Hemithea aestivaria</i>      | ENT996-004235   | GWNR349-07  | HQ648448 | Canada        | British Columbia | Royal British Columbia Museum                                    |
| <i>Hemithea aestivaria</i>      | PFC-2007-0214   | GWNP007-07  | HQ648446 | Canada        | British Columbia | Pacific Forestry Centre, Canadian Forest Service                 |
| <i>Hemithea aestivaria</i>      | PFC-2007-0215   | GWNP008-07  | HQ648445 | Canada        | British Columbia | Pacific Forestry Centre, Canadian Forest Service                 |
| <i>Hemithea aestivaria</i>      | PFC-2007-0216   | GWNP009-07  | HQ648444 | Canada        | British Columbia | Pacific Forestry Centre, Canadian Forest Service                 |
| <i>Hemithea aestivaria</i>      | PFC-2007-0217   | GWNP010-07  | HQ648443 | Canada        | British Columbia | Pacific Forestry Centre, Canadian Forest Service                 |
| <i>Hemithea aestivaria</i>      | PFC-2007-0218   | GWNP011-07  | HQ648442 | Canada        | British Columbia | Pacific Forestry Centre, Canadian Forest Service                 |
| <i>Hemithea aestivaria</i>      | PFC-2007-0220   | GWNP013-07  | HQ648441 | Canada        | British Columbia | Pacific Forestry Centre, Canadian Forest Service                 |
| <i>Hemithea aestivaria</i>      | PFC-2007-0221   | GWNP014-07  | HQ648440 | Canada        | British Columbia | Pacific Forestry Centre, Canadian Forest Service                 |
| <i>Hemithea aestivaria</i>      | UASM59768       | GWNS242-07  | HQ648439 | Canada        | British Columbia | Strickland Museum of Entomology, University of Alberta           |
| <i>Hesperumia latipennis</i>    | JECW-07-0031    | GWNJ031-07  | HQ648450 | United States | Washington       | James Entomological Collection, Washington State University      |
| <i>Hesperumia latipennis</i>    | JECW-07-0032    | GWNJ032-07  | HQ648449 | United States | Washington       | James Entomological Collection, Washington State University      |
| <i>Hesperumia sulphuraria</i>   | 08-JDWBC-1097   | LBCG1097-09 | HQ648457 | Canada        | British Columbia | Spencer Entomological Museum, UBC                                |
| <i>Hesperumia sulphuraria</i>   | CNCLPEP00033086 | GWNC087-07  | HQ648451 | United States | Washington       | Canadian National Collection of Insects, Arachnids and Nematodes |
| <i>Hesperumia sulphuraria</i>   | ENT990-000149   | GWNR096-07  | HQ648456 | Canada        | British Columbia | Royal British Columbia Museum                                    |
| <i>Hesperumia sulphuraria</i>   | JECW-07-0033    | GWNJ033-07  | HQ648453 | United States | Washington       | James Entomological Collection, Washington State University      |
| <i>Hesperumia sulphuraria</i>   | JECW-07-0035    | GWNJ035-07  | HQ648452 | United States | Washington       | James Entomological Collection, Washington State University      |
| <i>Hesperumia sulphuraria</i>   | UASM41307       | GWNS068-07  | HQ648455 | Canada        | Alberta          | Strickland Museum of Entomology, University of Alberta           |
| <i>Hesperumia sulphuraria</i>   | UASM57100       | GWNS069-07  | HQ648454 | Canada        | Alberta          | Strickland Museum of Entomology, University of Alberta           |
| <i>Horisme incana</i>           | ENT002-001756   | GWNR604-07  | HQ648462 | Canada        | British Columbia | Royal British Columbia Museum                                    |
| <i>Horisme incana</i>           | ENT002-001757   | GWNR605-07  | HQ648461 | Canada        | British Columbia | Royal British Columbia Museum                                    |
| <i>Horisme incana</i>           | JD0189          | GWNS417-07  | HQ648458 | Canada        | Alberta          | Strickland Museum of Entomology, University of Alberta           |
| <i>Horisme incana</i>           | UASM57012       | GWNS416-07  | HQ648459 | Canada        | Alberta          | Strickland Museum of Entomology, University of Alberta           |
| <i>Horisme incana</i>           | UASM58238       | GWNS415-07  | HQ648460 | Canada        | Alberta          | Strickland Museum of Entomology, University of Alberta           |
| <i>Horisme intestinata</i>      | ENT002-001755   | GWNR608-07  | HQ648466 | Canada        | British Columbia | Royal British Columbia Museum                                    |
| <i>Horisme intestinata</i>      | ENT996-005396   | GWNR607-07  | HQ648467 | Canada        | British Columbia | Royal British Columbia Museum                                    |
| <i>Horisme intestinata</i>      | UASM58105       | GWNS413-07  | HQ648464 | Canada        | Alberta          | Strickland Museum of Entomology, University of Alberta           |
| <i>Horisme intestinata</i>      | UASM58106       | GWNS412-07  | HQ648465 | Canada        | Alberta          | Strickland Museum of Entomology, University of Alberta           |
| <i>Horisme intestinata</i>      | UASM7307        | GWNS414-07  | HQ648463 | Canada        | Alberta          | Strickland Museum of Entomology, University of Alberta           |
| <i>Hulstina formosata</i>       | JECW-07-0041    | GWNJ041-07  | HQ648469 | United States | Idaho            | James Entomological Collection, Washington State University      |
| <i>Hulstina formosata</i>       | JECW-07-0042    | GWNJ042-07  | HQ648468 | United States | Idaho            | James Entomological Collection, Washington State University      |
| <i>Hulstina xera</i>            | JECW-07-0043    | GWNJ043-07  | HQ648470 | United States | Washington       | James Entomological Collection, Washington State University      |
| <i>Hydrelia albifera</i>        | HLC-20012       | LBCA012-05  | HQ648472 | Canada        | British Columbia | Biodiversity Institute of Ontario                                |
| <i>Hydrelia albifera</i>        | HLC-23472       | LBCD652-05  | HQ648471 | Canada        | British Columbia | Biodiversity Institute of Ontario                                |
| <i>Hydrelia albifera</i>        | PFC-2007-0336   | GWNP126-07  | HQ648475 | Canada        | British Columbia | Pacific Forestry Centre, Canadian Forest Service                 |
| <i>Hydrelia albifera</i>        | PFC-2007-0337   | GWNP127-07  | HQ648474 | Canada        | British Columbia | Pacific Forestry Centre, Canadian Forest Service                 |
| <i>Hydrelia albifera</i>        | UASM58127       | GWNS399-07  | HQ648473 | Canada        | Alberta          | Strickland Museum of Entomology, University of Alberta           |
| <i>Hydriomena albifasciata</i>  | 10-GOBCL-03     | GOBCL003-10 | HQ648478 | United States | California       | Barcode of Life Data System                                      |
| <i>Hydriomena albifasciata</i>  | 10-GOBCL-04     | GOBCL004-10 | HQ648477 | United States | California       | Barcode of Life Data System                                      |
| <i>Hydriomena albifasciata</i>  | 10-GOBCL-05     | GOBCL005-10 | HQ648476 | United States | California       | Barcode of Life Data System                                      |
| <i>Hydriomena albimontanata</i> | CNCLPEP00033312 | GWNC313-07  | HQ648480 | Canada        | Alberta          | Canadian National Collection of Insects, Arachnids and Nematodes |
| <i>Hydriomena albimontanata</i> | CNCLPEP00033313 | GWNC314-07  | HQ648479 | Canada        | British Columbia | Canadian National Collection of Insects, Arachnids and Nematodes |
| <i>Hydriomena californiata</i>  | CNCLPEP00033445 | GWNC446-07  | HQ648482 | Canada        | British Columbia | Canadian National Collection of Insects, Arachnids and Nematodes |
| <i>Hydriomena californiata</i>  | Dun-08-105      | DUNLP105-08 | HQ648481 | Canada        | British Columbia | Pacific Forestry Centre, Canadian Forest Service                 |
| <i>Hydriomena californiata</i>  | ENT991-065529   | GWNR430-07  | HQ648484 | Canada        | British Columbia | Royal British Columbia Museum                                    |
| <i>Hydriomena californiata</i>  | JECW-07-0147    | GWNJ147-07  | HQ648483 | United States | Washington       | James Entomological Collection, Washington State University      |
| <i>Hydriomena crokeri</i>       | CNCLPEP00033446 | GWNC447-07  | HQ648485 | United States | Oregon           | Canadian National Collection of Insects, Arachnids and Nematodes |
| <i>Hydriomena divisaria</i>     | CGWC-2734       | LOWCC854-05 | HQ648487 | Canada        | British Columbia | Biodiversity Institute of Ontario                                |
| <i>Hydriomena divisaria</i>     | Dun-08-099      | DUNLP099-08 | HQ648488 | Canada        | British Columbia | Pacific Forestry Centre, Canadian Forest Service                 |
| <i>Hydriomena divisaria</i>     | ENT996-007707   | GWNR626-07  | HQ648490 | Canada        | British Columbia | Royal British Columbia Museum                                    |
| <i>Hydriomena divisaria</i>     | HLC-20399       | LBCA399-05  | HQ648486 | Canada        | British Columbia | Biodiversity Institute of Ontario                                |
| <i>Hydriomena divisaria</i>     | UASM78450       | GWNS574-07  | HQ648489 | Canada        | Alberta          | Strickland Museum of Entomology, University of Alberta           |
| <i>Hydriomena edenata</i>       | ENT991-125451   | GWNR481-07  | HQ648493 | Canada        | British Columbia | Royal British Columbia Museum                                    |
| <i>Hydriomena edenata</i>       | JECW-07-0139    | GWNJ139-07  | HQ648492 | United States | Washington       | James Entomological Collection, Washington State University      |
| <i>Hydriomena edenata</i>       | JECW-07-0140    | GWNJ140-07  | HQ648491 | United States | Washington       | James Entomological Collection, Washington State University      |
| <i>Hydriomena exculpata</i>     | HLC-20291       | LBCA291-05  | HQ648498 | Canada        | British Columbia | Biodiversity Institute of Ontario                                |
| <i>Hydriomena exculpata</i>     | HLC-20314       | LBCA314-05  | HQ648497 | Canada        | British Columbia | Biodiversity Institute of Ontario                                |
| <i>Hydriomena exculpata</i>     | HLC-20721       | LBCA721-05  | HQ648496 | Canada        | British Columbia | Biodiversity Institute of Ontario                                |
| <i>Hydriomena exculpata</i>     | HLC-20866       | LBCA866-05  | HQ648495 | Canada        | British Columbia | Biodiversity Institute of Ontario                                |
| <i>Hydriomena exculpata</i>     | HLC-21372       | LBCB432-05  | HQ648494 | Canada        | British Columbia | Biodiversity Institute of Ontario                                |
| <i>Hydriomena furcata</i>       | 08-JDWBC-0774   | LBCG774-09  | HQ648518 | Canada        | British Columbia | Spencer Entomological Museum, UBC                                |
| <i>Hydriomena furcata</i>       | 08-JDWBC-0778   | LBCG778-09  | HQ648517 | Canada        | British Columbia | Spencer Entomological Museum, UBC                                |
| <i>Hydriomena furcata</i>       | 08-JDWBC-0780   | LBCG780-09  | HQ648516 | Canada        | British Columbia | Spencer Entomological Museum, UBC                                |
| <i>Hydriomena furcata</i>       | 08-JDWBC-0781   | LBCG781-09  | HQ648515 | Canada        | British Columbia | Spencer Entomological Museum, UBC                                |
| <i>Hydriomena furcata</i>       | 08-JDWBC-0793   | LBCG793-09  | HQ648514 | Canada        | British Columbia | Spencer Entomological Museum, UBC                                |
| <i>Hydriomena furcata</i>       | 08-JDWBC-0951   | LBCG951-09  | HQ648513 | Canada        | British Columbia | Spencer Entomological Museum, UBC                                |
| <i>Hydriomena furcata</i>       | 08-JDWBC-0992   | LBCG992-09  | HQ648512 | Canada        | British Columbia | Spencer Entomological Museum, UBC                                |
| <i>Hydriomena furcata</i>       | 08-JDWBC-1003   | LBCG1003-09 | HQ648511 | Canada        | British Columbia | Spencer Entomological Museum, UBC                                |
| <i>Hydriomena furcata</i>       | 08-JDWBC-1005   | LBCG1005-09 | HQ648510 | Canada        | British Columbia | Spencer Entomological Museum, UBC                                |
| <i>Hydriomena furcata</i>       | 08-JDWBC-1008   | LBCG1008-09 | HQ648509 | Canada        | British Columbia | Spencer Entomological Museum, UBC                                |
| <i>Hydriomena furcata</i>       | 08-JDWBC-2319   | LBCG2319-09 | HQ648519 | Canada        | British Columbia | Spencer Entomological Museum, UBC                                |
| <i>Hydriomena furcata</i>       | 08-JDWBC-2320   | LBCG2320-09 | HQ648520 | Canada        | British Columbia | Spencer Entomological Museum, UBC                                |
| <i>Hydriomena furcata</i>       | 08-JDWBC-2321   | LBCG2321-09 | HQ648521 | Canada        | British Columbia | Spencer Entomological Museum, UBC                                |
| <i>Hydriomena furcata</i>       | 08-JDWBC-2322   | LBCG2322-09 | HQ648522 | Canada        | British Columbia | Spencer Entomological Museum, UBC                                |
| <i>Hydriomena furcata</i>       | 08-JDWBC-2327   | LBCG2327-09 | HQ648523 | Canada        | British Columbia | Spencer Entomological Museum, UBC                                |
| <i>Hydriomena furcata</i>       | ENT002-001703   | GWNR476-07  | HQ648506 | Canada        | British Columbia | Royal British Columbia Museum                                    |
| <i>Hydriomena furcata</i>       | ENT991-009949   | GWNR480-07  | HQ648505 | Canada        | British Columbia | Royal British Columbia Museum                                    |
| <i>Hydriomena furcata</i>       | ENT992-021183   | GWNR475-07  | HQ648507 | Canada        | British Columbia | Royal British Columbia Museum                                    |
| <i>Hydriomena furcata</i>       | ENT996-004361   | GWNR474-07  | HQ648508 | Canada        | British Columbia | Royal British Columbia Museum                                    |
| <i>Hydriomena furcata</i>       | UASM58896       | GWNS346-07  | HQ648502 | Canada        | Alberta          | Strickland Museum of Entomology, University of Alberta           |
| <i>Hydriomena furcata</i>       | UASM58897       | GWNS345-07  | HQ648503 | Canada        | Alberta          | Strickland Museum of Entomology, University of Alberta           |
| <i>Hydriomena furcata</i>       | UASM7289        | GWNS348-07  | HQ648500 | Canada        | Alberta          | Strickland Museum of Entomology, University of Alberta           |
| <i>Hydriomena furcata</i>       | UASM7331        | GWNS347-07  | HQ648501 | Canada        | Alberta          | Strickland Museum of Entomology, University of Alberta           |
| <i>Hydriomena furcata</i>       | UASM95813       | GWNS334-07  | HQ648499 | Canada        | British Columbia | Strickland Museum of Entomology, University of Alberta           |
| <i>Hydriomena furcata</i>       | UASM95853       | GWNS517-07  | HQ648504 | Canada        | Alberta          | Strickland Museum of Entomology, University of Alberta           |
| <i>Hydriomena irata</i>         | Dun-08-101      | DUNLP101-08 | HQ648525 | Canada        | British Columbia | Pacific Forestry Centre, Canadian Forest Service                 |
| <i>Hydriomena irata</i>         | Dun-08-102      | DUNLP102-08 | HQ648524 | Canada        | British Columbia | Pacific Forestry Centre, Canadian Forest Service                 |
| <i>Hydriomena irata</i>         | Dun-08-103      | DUNLP103-08 | HQ648526 | Canada        | British Columbia | Pacific Forestry Centre, Canadian Forest Service                 |
| <i>Hydriomena irata</i>         | PFC-2007-0300   | GWNP093-07  | HQ648530 | Canada        | British Columbia | Pacific Forestry Centre, Canadian Forest Service                 |
| <i>Hydriomena irata</i>         | PFC-2007-0301   | GWNP094-07  | HQ648529 | Canada        | British Columbia | Pacific Forestry Centre, Canadian Forest Service                 |
| <i>Hydriomena irata</i>         | PFC-2007-0313   | GWNP103-07  | HQ648528 | Canada        | British Columbia | Pacific Forestry Centre, Canadian Forest Service                 |
| <i>Hydriomena irata</i>         | PFC-2007-0315   | GWNP105-07  | HQ648527 | Canada        | British Columbia | Pacific Forestry Centre, Canadian Forest Service                 |
| <i>Hydriomena macdunnoughi</i>  | CNCLPEP00033406 | GWNC407-07  | HQ648533 | Canada        | Alberta          | Canadian National Collection of Insects, Arachnids and Nematodes |
| <i>Hydriomena macdunnoughi</i>  | CNCLPEP00033447 | GWNC448-07  | HQ648532 | Canada        | Yukon Territory  | Canadian National Collection of Insects, Arachnids and Nematodes |
| <i>Hydriomena macdunnoughi</i>  | CNCLPEP00033449 | GWNC450-07  | HQ648531 | Canada        | British Columbia | Canadian National Collection of Insects, Arachnids and Nematodes |
| <i>Hydriomena manzanita</i>     | JECW-07-0141    | GWNJ141-07  | HQ648534 | Canada        | British Columbia | James Entomological Collection, Washington State University      |
| <i>Hydriomena manzanita</i>     | PFC-2007-0298   | GWNP091-07  | HQ648536 | Canada        | British Columbia | Pacific Forestry Centre, Canadian Forest Service                 |
| <i>Hydriomena manzanita</i>     | PFC-2007-0299   | GWNP092-07  | HQ648535 | Canada        | British Columbia | Pacific Forestry Centre, Canadian Forest Service                 |
| <i>Hydriomena marinata</i>      | Dun-08-098      | DUNLP098-08 | HQ648538 | Canada        | British Columbia | Pacific Forestry Centre, Canadian Forest Service                 |
| <i>Hydriomena marinata</i>      | Dun-08-106      | DUNLP106-08 | HQ648537 | Canada        | British Columbia | Pacific Forestry Centre, Canadian Forest Service                 |
| <i>Hydriomena marinata</i>      | UASM59747       | GWNS343-07  | HQ648539 | Canada        | British Columbia | Strickland Museum of Entomology, University of Alberta           |
| <i>Hydriomena morosata</i>      | CGWC-3108       | LOWCD288-06 | HQ648540 | Canada        | British Columbia | Biodiversity Institute of Ontario                                |
| <i>Hydriomena morosata</i>      | CNCLPEP00033407 | GWNC408-07  | HQ648541 | Canada        | Alberta          | Canadian National Collection of Insects, Arachnids and Nematodes |
| <i>Hydriomena morosata</i>      | ENT996-007729   | GWNR630-07  | HQ648543 | Canada        | British Columbia | Royal British Columbia Museum                                    |
| <i>Hydriomena morosata</i>      | ENT996-007733   | GWNR629-07  | HQ648544 | Canada        | British Columbia | Royal British Columbia Museum                                    |
| <i>Hydriomena morosata</i>      | UASM95816       | GWNS349-07  | HQ648542 | Canada        | Alberta          | Strickland Museum of Entomology, University of Alberta           |

|                                    |                    |             |          |               |                  |                                                                  |
|------------------------------------|--------------------|-------------|----------|---------------|------------------|------------------------------------------------------------------|
| <i>Hydriomena nevadae</i>          | CNCLEP00033444     | GWNC445-07  | HQ648545 | United States | Washington       | Canadian National Collection of Insects, Arachnids and Nematodes |
| <i>Hydriomena nubilofasciata</i>   | CNCLEP00034036     | GWNC474-07  | HQ648546 | United States | Washington       | Canadian National Collection of Insects, Arachnids and Nematodes |
| <i>Hydriomena nubilofasciata</i>   | PFC-2007-0297      | GWNP090-07  | HQ648547 | Canada        | British Columbia | Pacific Forestry Centre, Canadian Forest Service                 |
| <i>Hydriomena perfracta</i>        | CNCLEP00033437     | GWNC438-07  | HQ648549 | Canada        | British Columbia | Canadian National Collection of Insects, Arachnids and Nematodes |
| <i>Hydriomena perfracta</i>        | HLC-20242          | LBCA242-05  | HQ648548 | Canada        | British Columbia | Biodiversity Institute of Ontario                                |
| <i>Hydriomena perfracta</i>        | NFRC-P-2007-100056 | GWNN056-07  | HQ648551 | Canada        | Alberta          | Northern Forestry Centre, Canadian Forest Service                |
| <i>Hydriomena perfracta</i>        | UASM7161           | GWNS342-07  | HQ648550 | Canada        | Alberta          | Strickland Museum of Entomology, University of Alberta           |
| <i>Hydriomena quinquefasciata</i>  | CNCLEP00034024     | GWNC462-07  | HQ648552 | Canada        | British Columbia | Canadian National Collection of Insects, Arachnids and Nematodes |
| <i>Hydriomena renunciata</i>       | CNCLEP00033299     | GWNC300-07  | HQ648553 | Canada        | British Columbia | Canadian National Collection of Insects, Arachnids and Nematodes |
| <i>Hydriomena renunciata</i>       | ENT987-000324      | GWNR473-07  | HQ648560 | Canada        | British Columbia | Royal British Columbia Museum                                    |
| <i>Hydriomena renunciata</i>       | ENT996-004488      | GWNR477-07  | HQ648559 | Canada        | British Columbia | Royal British Columbia Museum                                    |
| <i>Hydriomena renunciata</i>       | ENT996-004501      | GWNR478-07  | HQ648558 | Canada        | British Columbia | Royal British Columbia Museum                                    |
| <i>Hydriomena renunciata</i>       | JECW-07-0144       | GWNJ144-07  | HQ648554 | Canada        | British Columbia | James Entomological Collection, Washington State University      |
| <i>Hydriomena renunciata</i>       | NFRC-P-2007-100058 | GWNN058-07  | HQ648556 | Canada        | Alberta          | Northern Forestry Centre, Canadian Forest Service                |
| <i>Hydriomena renunciata</i>       | PFC-2007-0306      | GWNP096-07  | HQ648555 | Canada        | British Columbia | Pacific Forestry Centre, Canadian Forest Service                 |
| <i>Hydriomena renunciata</i>       | UASM78451          | GWNS575-07  | HQ648557 | Canada        | Alberta          | Strickland Museum of Entomology, University of Alberta           |
| <i>Hydriomena ruberata</i>         | CNCLEP00033405     | GWNC406-07  | HQ648563 | Canada        | Alberta          | Canadian National Collection of Insects, Arachnids and Nematodes |
| <i>Hydriomena ruberata</i>         | CNCLEP00033441     | GWNC442-07  | HQ648561 | Canada        | British Columbia | Canadian National Collection of Insects, Arachnids and Nematodes |
| <i>Hydriomena ruberata</i>         | CNCLEP00033448     | GWNC449-07  | HQ648562 | Canada        | Yukon Territory  | Canadian National Collection of Insects, Arachnids and Nematodes |
| <i>Hydriomena ruberata</i>         | ENT996-007708      | GWNR627-07  | HQ648568 | Canada        | British Columbia | Royal British Columbia Museum                                    |
| <i>Hydriomena ruberata</i>         | ENT996-007709      | GWNR628-07  | HQ648567 | Canada        | British Columbia | Royal British Columbia Museum                                    |
| <i>Hydriomena ruberata</i>         | NFRC-P-2007-100059 | GWNN059-07  | HQ648566 | Canada        | Alberta          | Northern Forestry Centre, Canadian Forest Service                |
| <i>Hydriomena ruberata</i>         | NFRC-P-2007-100060 | GWNN060-07  | HQ648565 | Canada        | Alberta          | Northern Forestry Centre, Canadian Forest Service                |
| <i>Hydriomena ruberata</i>         | NFRC-P-2007-100061 | GWNN061-07  | HQ648564 | Canada        | Alberta          | Northern Forestry Centre, Canadian Forest Service                |
| <i>Hydriomena sp.</i>              | Dun-08-104         | DUNLP104-08 | HQ648569 | Canada        | British Columbia | Pacific Forestry Centre, Canadian Forest Service                 |
| <i>Hydriomena speciosata</i>       | Dun-08-108         | DUNLP108-08 | HQ648571 | Canada        | British Columbia | Pacific Forestry Centre, Canadian Forest Service                 |
| <i>Hydriomena speciosata</i>       | Dun-08-109         | DUNLP109-08 | HQ648570 | Canada        | British Columbia | Pacific Forestry Centre, Canadian Forest Service                 |
| <i>Hypagyrtis piniata</i>          | Dun-08-110         | DUNLP110-08 | HQ648575 | Canada        | British Columbia | Pacific Forestry Centre, Canadian Forest Service                 |
| <i>Hypagyrtis piniata</i>          | HLC-20862          | LBCA862-05  | HQ648574 | Canada        | British Columbia | Biodiversity Institute of Ontario                                |
| <i>Hypagyrtis piniata</i>          | HLC-21202          | LBCB262-05  | HQ648573 | Canada        | British Columbia | Biodiversity Institute of Ontario                                |
| <i>Hypagyrtis piniata</i>          | HLC-22053          | LBCCL173-05 | HQ648572 | Canada        | British Columbia | Biodiversity Institute of Ontario                                |
| <i>Hypagyrtis piniata</i>          | UASM95874          | GWNS545-07  | HQ648576 | Canada        | Alberta          | Strickland Museum of Entomology, University of Alberta           |
| <i>Hypagyrtis unipunctata</i>      | CGWC-0744          | LOWC744-05  | HQ648580 | Canada        | British Columbia | Biodiversity Institute of Ontario                                |
| <i>Hypagyrtis unipunctata</i>      | CGWC-0765          | LOWC765-05  | HQ648579 | Canada        | British Columbia | Biodiversity Institute of Ontario                                |
| <i>Hypagyrtis unipunctata</i>      | HLC-20836          | LBCA836-05  | HQ648578 | Canada        | British Columbia | Biodiversity Institute of Ontario                                |
| <i>Hypagyrtis unipunctata</i>      | HLC-21656          | LBCB716-05  | HQ648577 | Canada        | British Columbia | Biodiversity Institute of Ontario                                |
| <i>Hypagyrtis unipunctata</i>      | UASM41631          | GWNS096-07  | HQ648581 | Canada        | Alberta          | Strickland Museum of Entomology, University of Alberta           |
| <i>Idaeia demissaria</i>           | ENT996-007631      | GWNR619-07  | HQ648586 | Canada        | British Columbia | Royal British Columbia Museum                                    |
| <i>Idaeia demissaria</i>           | ENT996-007632      | GWNR620-07  | HQ648585 | Canada        | British Columbia | Royal British Columbia Museum                                    |
| <i>Idaeia demissaria</i>           | ENT996-007633      | GWNR621-07  | HQ648584 | Canada        | British Columbia | Royal British Columbia Museum                                    |
| <i>Idaeia demissaria</i>           | JECW-07-0129       | GWNJ129-07  | HQ648582 | United States | Washington       | James Entomological Collection, Washington State University      |
| <i>Idaeia demissaria</i>           | PFC-2007-0223      | GWNP016-07  | HQ648583 | Canada        | British Columbia | Pacific Forestry Centre, Canadian Forest Service                 |
| <i>Idaeia dimidiata</i>            | CNCLEP00033260     | GWNC261-07  | HQ648588 | Canada        | British Columbia | Canadian National Collection of Insects, Arachnids and Nematodes |
| <i>Idaeia dimidiata</i>            | CNCLEP00033261     | GWNC262-07  | HQ648587 | Canada        | British Columbia | Canadian National Collection of Insects, Arachnids and Nematodes |
| <i>Idaeia dimidiata</i>            | ENT996-004267      | GWNR379-07  | HQ648590 | United States | Washington       | Royal British Columbia Museum                                    |
| <i>Idaeia dimidiata</i>            | ENT996-004277      | GWNR377-07  | HQ648592 | Canada        | British Columbia | Royal British Columbia Museum                                    |
| <i>Idaeia dimidiata</i>            | ENT996-004280      | GWNR378-07  | HQ648591 | Canada        | British Columbia | Royal British Columbia Museum                                    |
| <i>Idaeia dimidiata</i>            | PFC-2007-0222      | GWNP015-07  | HQ648589 | Canada        | British Columbia | Pacific Forestry Centre, Canadian Forest Service                 |
| <i>Idaeia rotundopennata</i>       | NFRC-P-2007-100040 | GWNN040-07  | HQ648595 | Canada        | Alberta          | Northern Forestry Centre, Canadian Forest Service                |
| <i>Idaeia rotundopennata</i>       | NFRC-P-2007-100041 | GWNN041-07  | HQ648594 | Canada        | Alberta          | Northern Forestry Centre, Canadian Forest Service                |
| <i>Idaeia rotundopennata</i>       | NFRC-P-2007-100042 | GWNN042-07  | HQ648593 | Canada        | Alberta          | Northern Forestry Centre, Canadian Forest Service                |
| <i>Indopsis clivnaria</i>          | CNCLEP00033098     | GWNC099-07  | HQ648596 | Canada        | British Columbia | Canadian National Collection of Insects, Arachnids and Nematodes |
| <i>Indopsis clivnaria</i>          | ENT996-003519      | GWNR079-07  | HQ648599 | United States | Washington       | Royal British Columbia Museum                                    |
| <i>Indopsis clivnaria</i>          | JECW-07-0044       | GWNJ044-07  | HQ648598 | United States | Washington       | James Entomological Collection, Washington State University      |
| <i>Indopsis clivnaria</i>          | JECW-07-0045       | GWNJ045-07  | HQ648597 | United States | Washington       | James Entomological Collection, Washington State University      |
| <i>Indopsis larvata</i>            | 08-JDWBC-1084      | LBCG1084-09 | HQ648611 | Canada        | British Columbia | Spencer Entomological Museum, UBC                                |
| <i>Indopsis larvata</i>            | ENT002-001546      | GWNR104-07  | HQ648604 | Canada        | British Columbia | Royal British Columbia Museum                                    |
| <i>Indopsis larvata</i>            | ENT996-003559      | GWNR098-07  | HQ648608 | Canada        | British Columbia | Royal British Columbia Museum                                    |
| <i>Indopsis larvata</i>            | ENT996-003568      | GWNR102-07  | HQ648606 | Canada        | British Columbia | Royal British Columbia Museum                                    |
| <i>Indopsis larvata</i>            | ENT996-003575      | GWNR097-07  | HQ648609 | United States | Washington       | Royal British Columbia Museum                                    |
| <i>Indopsis larvata</i>            | ENT996-003580      | GWNR101-07  | HQ648607 | United States | Washington       | Royal British Columbia Museum                                    |
| <i>Indopsis larvata</i>            | ENT996-007374      | GWNR103-07  | HQ648605 | Canada        | British Columbia | Royal British Columbia Museum                                    |
| <i>Indopsis larvata</i>            | NFRC-P-2007-100017 | GWNN017-07  | HQ648603 | Canada        | Alberta          | Northern Forestry Centre, Canadian Forest Service                |
| <i>Indopsis larvata</i>            | NFRC-P-2007-100018 | GWNN018-07  | HQ648602 | Canada        | Alberta          | Northern Forestry Centre, Canadian Forest Service                |
| <i>Indopsis larvata</i>            | PFC-2007-0376      | GWNP166-07  | HQ648610 | Canada        | British Columbia | Pacific Forestry Centre, Canadian Forest Service                 |
| <i>Indopsis larvata</i>            | UASM41076          | GWNS076-07  | HQ648601 | Canada        | Alberta          | Strickland Museum of Entomology, University of Alberta           |
| <i>Indopsis larvata</i>            | UASM7011           | GWNS077-07  | HQ648600 | Canada        | Alberta          | Strickland Museum of Entomology, University of Alberta           |
| <i>Ixala desperaria</i>            | UASM57510          | GWNS109-07  | HQ648612 | Canada        | Alberta          | Strickland Museum of Entomology, University of Alberta           |
| <i>Lambdina fuscifera</i>          | CBCC1222           | GWNS552-07  | HQ648624 | Canada        | Alberta          | Strickland Museum of Entomology, University of Alberta           |
| <i>Lambdina fuscifera</i>          | CBCC1223           | GWNS550-07  | HQ648625 | Canada        | Alberta          | Strickland Museum of Entomology, University of Alberta           |
| <i>Lambdina fuscifera</i>          | CNCLEP00033209     | GWNC210-07  | HQ648615 | Canada        | British Columbia | Canadian National Collection of Insects, Arachnids and Nematodes |
| <i>Lambdina fuscifera</i>          | CNCLEP00033210     | GWNC211-07  | HQ648614 | Canada        | British Columbia | Canadian National Collection of Insects, Arachnids and Nematodes |
| <i>Lambdina fuscifera</i>          | Dun-08-112         | DUNLP112-08 | HQ648613 | Canada        | British Columbia | Pacific Forestry Centre, Canadian Forest Service                 |
| <i>Lambdina fuscifera</i>          | ENT991-010424      | GWNR290-07  | HQ648631 | Canada        | British Columbia | Royal British Columbia Museum                                    |
| <i>Lambdina fuscifera</i>          | ENT991-011454      | GWNR291-07  | HQ648630 | Canada        | British Columbia | Royal British Columbia Museum                                    |
| <i>Lambdina fuscifera</i>          | ENT996-004032      | GWNR292-07  | HQ648629 | Canada        | British Columbia | Royal British Columbia Museum                                    |
| <i>Lambdina fuscifera</i>          | ENT996-007540      | GWNR366-07  | HQ648628 | Canada        | British Columbia | Royal British Columbia Museum                                    |
| <i>Lambdina fuscifera</i>          | ENT996-007542      | GWNR367-07  | HQ648627 | Canada        | British Columbia | Royal British Columbia Museum                                    |
| <i>Lambdina fuscifera</i>          | ENT996-007543      | GWNR368-07  | HQ648626 | Canada        | British Columbia | Royal British Columbia Museum                                    |
| <i>Lambdina fuscifera</i>          | PFC-2007-0401      | GWNP191-07  | HQ648622 | Canada        | British Columbia | Pacific Forestry Centre, Canadian Forest Service                 |
| <i>Lambdina fuscifera</i>          | PFC-2007-0402      | GWNP192-07  | HQ648621 | Canada        | British Columbia | Pacific Forestry Centre, Canadian Forest Service                 |
| <i>Lambdina fuscifera</i>          | PFC-2007-0405      | GWNP195-07  | HQ648620 | Canada        | British Columbia | Pacific Forestry Centre, Canadian Forest Service                 |
| <i>Lambdina fuscifera</i>          | PFC-2007-0407      | GWNP197-07  | HQ648619 | Canada        | British Columbia | Pacific Forestry Centre, Canadian Forest Service                 |
| <i>Lambdina fuscifera</i>          | PFC-2007-0408      | GWNP198-07  | HQ648618 | Canada        | British Columbia | Pacific Forestry Centre, Canadian Forest Service                 |
| <i>Lambdina fuscifera</i>          | UASM58364          | GWNS201-07  | HQ648623 | Canada        | Alberta          | Strickland Museum of Entomology, University of Alberta           |
| <i>Lambdina fuscifera</i>          | WFBM-07-0060       | GWNW060-07  | HQ648617 | United States | Idaho            | University of Idaho, W. F. Barr Entomological Collection         |
| <i>Lambdina fuscifera</i>          | WFBM-07-0061       | GWNW061-07  | HQ648616 | United States | Idaho            | University of Idaho, W. F. Barr Entomological Collection         |
| <i>Lampropteryx suffumata</i>      | 08-JDWBC-0272      | LBCG272-08  | HQ648632 | Canada        | British Columbia | Spencer Entomological Museum, UBC                                |
| <i>Lampropteryx suffumata</i>      | 08-JDWBC-0279      | LBCG279-08  | HQ648633 | Canada        | British Columbia | Spencer Entomological Museum, UBC                                |
| <i>Lampropteryx suffumata</i>      | CNCLEP00033310     | GWNC311-07  | FJ376639 | Canada        | Alberta          | Canadian National Collection of Insects, Arachnids and Nematodes |
| <i>Lampropteryx suffumata</i>      | ENT991-006550      | GWNR470-07  | FJ376637 | Canada        | British Columbia | Royal British Columbia Museum                                    |
| <i>Lampropteryx suffumata</i>      | HLC-20022          | LBCA022-05  | FJ376638 | Canada        | British Columbia | Biodiversity Institute of Ontario                                |
| <i>Lampropteryx suffumata</i>      | HLC-20175          | LBCA175-05  | FJ376643 | Canada        | British Columbia | Biodiversity Institute of Ontario                                |
| <i>Lampropteryx suffumata</i>      | HLC-20320          | LBCA320-05  | FJ376642 | Canada        | British Columbia | Biodiversity Institute of Ontario                                |
| <i>Lampropteryx suffumata</i>      | HLC-20568          | LBCA568-05  | FJ376636 | Canada        | British Columbia | Biodiversity Institute of Ontario                                |
| <i>Leptostales ferruginaria</i>    | CNCLEP00033331     | GWNC332-07  | HQ648635 | Canada        | Alberta          | Canadian National Collection of Insects, Arachnids and Nematodes |
| <i>Leptostales ferruginaria</i>    | CNCLEP00033332     | GWNC333-07  | HQ648634 | Canada        | Alberta          | Canadian National Collection of Insects, Arachnids and Nematodes |
| <i>Leptostales ferruginaria</i>    | UASM58026          | GWNS281-07  | HQ648636 | Canada        | Alberta          | Strickland Museum of Entomology, University of Alberta           |
| <i>Leptostales ferruginaria</i>    | UASM58054          | GWNS280-07  | HQ648637 | Canada        | Alberta          | Strickland Museum of Entomology, University of Alberta           |
| <i>Leptostales rubromarginaria</i> | CNCLEP00033284     | GWNC285-07  | HQ648639 | Canada        | British Columbia | Canadian National Collection of Insects, Arachnids and Nematodes |
| <i>Leptostales rubromarginaria</i> | CNCLEP00033333     | GWNC334-07  | HQ648638 | Canada        | British Columbia | Canadian National Collection of Insects, Arachnids and Nematodes |
| <i>Leptostales rubromarginaria</i> | JECW-07-0131       | GWNJ131-07  | HQ648640 | United States | Washington       | James Entomological Collection, Washington State University      |
| <i>Leptostales rubromarginaria</i> | PFC-2007-0213      | GWNP006-07  | HQ648641 | Canada        | British Columbia | Pacific Forestry Centre, Canadian Forest Service                 |
| <i>Leptostales rubromarginaria</i> | WFBM-07-0077       | GWNW077-07  | HQ648642 | United States | Idaho            | University of Idaho, W. F. Barr Entomological Collection         |
| <i>Leucobrepheos brephoides</i>    | CNCLEP00033002     | GWNC003-07  | HQ648643 | Canada        | Quebec           | Canadian National Collection of Insects, Arachnids and Nematodes |
| <i>Lobophora canavestia</i>        | JECW-07-0178       | GWNJ178-07  | HQ648644 | United States | California       | James Entomological Collection, Washington State University      |
| <i>Lobophora magnolioidata</i>     | CNCLEP00033402     | GWNC403-07  | HQ648645 | Canada        | Alberta          | Canadian National Collection of Insects, Arachnids and Nematodes |

|                                |                    |             |          |               |                  |                                                                  |
|--------------------------------|--------------------|-------------|----------|---------------|------------------|------------------------------------------------------------------|
| <i>Lobophora magnolioidata</i> | CNCLEP00035469     | GWNC703-07  | HQ648646 | Canada        | British Columbia | Canadian National Collection of Insects, Arachnids and Nematodes |
| <i>Lobophora magnolioidata</i> | ENT002-001759      | GWNR617-07  | HQ648652 | Canada        | British Columbia | Royal British Columbia Museum                                    |
| <i>Lobophora magnolioidata</i> | ENT002-001760      | GWNR618-07  | HQ648651 | Canada        | British Columbia | Royal British Columbia Museum                                    |
| <i>Lobophora magnolioidata</i> | FFC-2007-0232      | GWNP025-07  | HQ648650 | Canada        | British Columbia | Pacific Forestry Centre, Canadian Forest Service                 |
| <i>Lobophora magnolioidata</i> | UASM24860          | GWNS485-07  | HQ648649 | Canada        | Alberta          | Strickland Museum of Entomology, University of Alberta           |
| <i>Lobophora magnolioidata</i> | UASM57988          | GWNS483-07  | HQ648648 | Canada        | Alberta          | Strickland Museum of Entomology, University of Alberta           |
| <i>Lobophora magnolioidata</i> | UASM7028           | GWNS484-07  | HQ648647 | Canada        | Alberta          | Strickland Museum of Entomology, University of Alberta           |
| <i>Lobophora montanata</i>     | CNCLEP00035467     | GWNC701-07  | HQ648653 | United States | Colorado         | Canadian National Collection of Insects, Arachnids and Nematodes |
| <i>Lobophora nivergerata</i>   | UASM24861          | GWNS487-07  | HQ648654 | Canada        | Alberta          | Strickland Museum of Entomology, University of Alberta           |
| <i>Lobophora simsata</i>       | ENT996-007857      | GWNR653-07  | HQ648656 | Canada        | British Columbia | Royal British Columbia Museum                                    |
| <i>Lobophora simsata</i>       | WFBM-07-0091       | GWNW091-07  | HQ648655 | United States | Idaho            | University of Idaho, W. F. Barr Entomological Collection         |
| <i>Lomographa semiclarata</i>  | ENT002-001559      | GWNR148-07  | HQ648662 | Canada        | British Columbia | Royal British Columbia Museum                                    |
| <i>Lomographa semiclarata</i>  | ENT002-001576      | GWNR149-07  | HQ648661 | Canada        | British Columbia | Royal British Columbia Museum                                    |
| <i>Lomographa semiclarata</i>  | ENT996-003705      | GWNR147-07  | HQ648663 | United States | Washington       | Royal British Columbia Museum                                    |
| <i>Lomographa semiclarata</i>  | ENT996-003715      | GWNR146-07  | HQ648664 | United States | Washington       | Royal British Columbia Museum                                    |
| <i>Lomographa semiclarata</i>  | JECW-07-0049       | GWNJ049-07  | HQ648657 | United States | Idaho            | James Entomological Collection, Washington State University      |
| <i>Lomographa semiclarata</i>  | UASM34536          | GWNS102-07  | HQ648658 | Canada        | Alberta          | Strickland Museum of Entomology, University of Alberta           |
| <i>Lomographa semiclarata</i>  | UASM57328          | GWNS100-07  | HQ648660 | Canada        | Alberta          | Strickland Museum of Entomology, University of Alberta           |
| <i>Lomographa semiclarata</i>  | UASM58230          | GWNS101-07  | HQ648659 | Canada        | Alberta          | Strickland Museum of Entomology, University of Alberta           |
| <i>Lycia rachelae</i>          | 07-JDWBC-0058      | GWND047-07  | HQ648667 | Canada        | Alberta          | Spencer Entomological Museum, UBC                                |
| <i>Lycia rachelae</i>          | 07-JDWBC-0059      | GWND048-07  | HQ648666 | Canada        | Alberta          | Spencer Entomological Museum, UBC                                |
| <i>Lycia rachelae</i>          | 07-JDWBC-0060      | GWND049-07  | HQ648665 | Canada        | Alberta          | Spencer Entomological Museum, UBC                                |
| <i>Lycia ursaria</i>           | CGWC-3952          | LOWCE192-06 | HQ648668 | Canada        | British Columbia | Biodiversity Institute of Ontario                                |
| <i>Lycia ursaria</i>           | ENT002-001554      | GWNR141-07  | HQ648672 | Canada        | British Columbia | Royal British Columbia Museum                                    |
| <i>Lycia ursaria</i>           | ENT002-001555      | GWNR142-07  | HQ648671 | Canada        | British Columbia | Royal British Columbia Museum                                    |
| <i>Lycia ursaria</i>           | UASM24878          | GWNS094-07  | HQ648670 | Canada        | Alberta          | Strickland Museum of Entomology, University of Alberta           |
| <i>Lycia ursaria</i>           | UASM59757          | GWNS093-07  | HQ648669 | Canada        | British Columbia | Strickland Museum of Entomology, University of Alberta           |
| <i>Macaria adonis</i>          | 08-JDWBC-1109      | LBCG1109-09 | HQ648682 | Canada        | British Columbia | Spencer Entomological Museum, UBC                                |
| <i>Macaria adonis</i>          | 08-JDWBC-1318      | LBCG1318-09 | HQ648684 | Canada        | British Columbia | Spencer Entomological Museum, UBC                                |
| <i>Macaria adonis</i>          | 08-JDWBC-1319      | LBCG1319-09 | HQ648683 | Canada        | British Columbia | Spencer Entomological Museum, UBC                                |
| <i>Macaria adonis</i>          | CNCLEP00033058     | GWNC059-07  | HQ648675 | Canada        | British Columbia | Canadian National Collection of Insects, Arachnids and Nematodes |
| <i>Macaria adonis</i>          | CNCLEP00033343     | GWNC344-07  | HQ648674 | Canada        | British Columbia | Canadian National Collection of Insects, Arachnids and Nematodes |
| <i>Macaria adonis</i>          | Dun-08-115         | DUNLP115-08 | HQ648673 | Canada        | British Columbia | Pacific Forestry Centre, Canadian Forest Service                 |
| <i>Macaria adonis</i>          | ENT996-003267      | GWNR035-07  | HQ648680 | Canada        | British Columbia | Royal British Columbia Museum                                    |
| <i>Macaria adonis</i>          | JECW-07-0011       | GWNJ011-07  | HQ648676 | United States | Washington       | James Entomological Collection, Washington State University      |
| <i>Macaria adonis</i>          | JECW-07-0012       | GWNJ012-07  | HQ648677 | United States | Idaho            | James Entomological Collection, Washington State University      |
| <i>Macaria adonis</i>          | FFC-2007-0344      | GWNP134-07  | HQ648679 | Canada        | British Columbia | Pacific Forestry Centre, Canadian Forest Service                 |
| <i>Macaria adonis</i>          | FFC-2007-0345      | GWNP135-07  | HQ648678 | Canada        | British Columbia | Pacific Forestry Centre, Canadian Forest Service                 |
| <i>Macaria adonis</i>          | WFBM-07-0006       | GWNW006-07  | HQ648681 | United States | Idaho            | University of Idaho, W. F. Barr Entomological Collection         |
| <i>Macaria aemulataria</i>     | UASM58112          | GWNS027-07  | HQ648685 | Canada        | Alberta          | Strickland Museum of Entomology, University of Alberta           |
| <i>Macaria amboffava</i>       | CBC804             | GWNS013-07  | HQ648688 | Canada        | Alberta          | Strickland Museum of Entomology, University of Alberta           |
| <i>Macaria amboffava</i>       | CNCLEP00033019     | GWNC020-07  | HQ648687 | Canada        | British Columbia | Canadian National Collection of Insects, Arachnids and Nematodes |
| <i>Macaria amboffava</i>       | CNCLEP00033020     | GWNC021-07  | HQ648686 | Canada        | British Columbia | Canadian National Collection of Insects, Arachnids and Nematodes |
| <i>Macaria amboffava</i>       | ENT002-001532      | GWNR030-07  | HQ648693 | Canada        | British Columbia | Royal British Columbia Museum                                    |
| <i>Macaria amboffava</i>       | ENT002-001533      | GWNR032-07  | HQ648691 | Canada        | British Columbia | Royal British Columbia Museum                                    |
| <i>Macaria amboffava</i>       | ENT002-001534      | GWNR031-07  | HQ648692 | Canada        | British Columbia | Royal British Columbia Museum                                    |
| <i>Macaria amboffava</i>       | UASM57938          | GWNS012-07  | HQ648689 | Canada        | Alberta          | Strickland Museum of Entomology, University of Alberta           |
| <i>Macaria amboffava</i>       | UASM58577          | GWNS011-07  | HQ648690 | Canada        | Alberta          | Strickland Museum of Entomology, University of Alberta           |
| <i>Macaria atrimacularia</i>   | 09-JDWGEO-482      | GNAU182-10  | HM392451 | United States | Texas            | Smithsonian Institution                                          |
| <i>Macaria bitactata</i>       | 08-JDWBC-0208      | LBCG208-08  | HQ648701 | Canada        | British Columbia | Spencer Entomological Museum, UBC                                |
| <i>Macaria bitactata</i>       | 08-JDWBC-1006      | LBCG1006-09 | HQ648702 | Canada        | British Columbia | Spencer Entomological Museum, UBC                                |
| <i>Macaria bitactata</i>       | CNCLEP00033037     | GWNC038-07  | HQ648694 | Canada        | British Columbia | Canadian National Collection of Insects, Arachnids and Nematodes |
| <i>Macaria bitactata</i>       | CNCLEP00033339     | GWNC340-07  | HQ648696 | Canada        | Alberta          | Canadian National Collection of Insects, Arachnids and Nematodes |
| <i>Macaria bitactata</i>       | CNCLEP00033340     | GWNC341-07  | HQ648695 | Canada        | Alberta          | Canadian National Collection of Insects, Arachnids and Nematodes |
| <i>Macaria bitactata</i>       | ENT996-003186      | GWNR013-07  | HQ648700 | Canada        | British Columbia | Royal British Columbia Museum                                    |
| <i>Macaria brunneata</i>       | NFRP-P-2007-100005 | GWNN005-07  | HQ648699 | Canada        | Alberta          | Northern Forestry Centre, Canadian Forest Service                |
| <i>Macaria brunneata</i>       | NFRP-P-2007-100006 | GWNN006-07  | HQ648698 | Canada        | Alberta          | Northern Forestry Centre, Canadian Forest Service                |
| <i>Macaria brunneata</i>       | NFRP-P-2007-100007 | GWNN007-07  | HQ648697 | Canada        | Alberta          | Northern Forestry Centre, Canadian Forest Service                |
| <i>Macaria brunneata</i>       | CNCLEP00033026     | GWNC027-07  | HQ648703 | Canada        | British Columbia | Canadian National Collection of Insects, Arachnids and Nematodes |
| <i>Macaria brunneata</i>       | CNCLEP00033027     | GWNC028-07  | HQ648704 | Canada        | British Columbia | Canadian National Collection of Insects, Arachnids and Nematodes |
| <i>Macaria brunneata</i>       | ENT002-001535      | GWNR016-07  | HQ648708 | Canada        | British Columbia | Royal British Columbia Museum                                    |
| <i>Macaria brunneata</i>       | ENT996-003177      | GWNR015-07  | HQ648709 | United States | Washington       | Royal British Columbia Museum                                    |
| <i>Macaria brunneata</i>       | ENT996-003178      | GWNR014-07  | HQ648710 | United States | Washington       | Royal British Columbia Museum                                    |
| <i>Macaria brunneata</i>       | JD0841             | GWNS554-07  | HQ648711 | Canada        | Alberta          | Strickland Museum of Entomology, University of Alberta           |
| <i>Macaria brunneata</i>       | UASM34898          | GWNS016-07  | HQ648705 | Canada        | Alberta          | Strickland Museum of Entomology, University of Alberta           |
| <i>Macaria brunneata</i>       | UASM58780          | GWNS014-07  | HQ648707 | Canada        | Alberta          | Strickland Museum of Entomology, University of Alberta           |
| <i>Macaria brunneata</i>       | UASM78365          | GWNS015-07  | HQ648706 | Canada        | Alberta          | Strickland Museum of Entomology, University of Alberta           |
| <i>Macaria colata</i>          | CNCLEP00033040     | GWNC041-07  | HQ648712 | Canada        | British Columbia | Canadian National Collection of Insects, Arachnids and Nematodes |
| <i>Macaria colata</i>          | ENT996-003189      | GWNR018-07  | HQ648718 | Canada        | British Columbia | Royal British Columbia Museum                                    |
| <i>Macaria colata</i>          | ENT996-003192      | GWNR017-07  | HQ648719 | United States | Washington       | Royal British Columbia Museum                                    |
| <i>Macaria colata</i>          | ENT996-003195      | GWNR019-07  | HQ648717 | United States | Washington       | Royal British Columbia Museum                                    |
| <i>Macaria colata</i>          | JECW-07-0001       | GWNJ001-07  | HQ648715 | United States | Washington       | James Entomological Collection, Washington State University      |
| <i>Macaria colata</i>          | JECW-07-0003       | GWNJ003-07  | HQ648714 | United States | Washington       | James Entomological Collection, Washington State University      |
| <i>Macaria colata</i>          | JECW-07-0004       | GWNJ004-07  | HQ648713 | United States | Washington       | James Entomological Collection, Washington State University      |
| <i>Macaria colata</i>          | FFC-2007-0359      | GWNP149-07  | HQ648716 | Canada        | British Columbia | Pacific Forestry Centre, Canadian Forest Service                 |
| <i>Macaria colata</i>          | WFBM-07-0001       | GWNW001-07  | HQ648720 | United States | Idaho            | University of Idaho, W. F. Barr Entomological Collection         |
| <i>Macaria decorata</i>        | 08-JDWBC-0200      | LBCG200-08  | HQ648728 | Canada        | British Columbia | Spencer Entomological Museum, UBC                                |
| <i>Macaria decorata</i>        | 08-JDWBC-0207      | LBCG207-08  | HQ648727 | Canada        | British Columbia | Spencer Entomological Museum, UBC                                |
| <i>Macaria decorata</i>        | 08-JDWBC-1335      | LBCG1335-09 | HQ648730 | Canada        | British Columbia | Spencer Entomological Museum, UBC                                |
| <i>Macaria decorata</i>        | 08-JDWBC-1338      | LBCG1338-09 | HQ648729 | Canada        | British Columbia | Spencer Entomological Museum, UBC                                |
| <i>Macaria decorata</i>        | CNCLEP00033039     | GWNC040-07  | HQ648721 | Canada        | British Columbia | Canadian National Collection of Insects, Arachnids and Nematodes |
| <i>Macaria decorata</i>        | CNCLEP00033325     | GWNC326-07  | HQ648723 | Canada        | Alberta          | Canadian National Collection of Insects, Arachnids and Nematodes |
| <i>Macaria decorata</i>        | CNCLEP00033327     | GWNC328-07  | HQ648722 | Canada        | Alberta          | Canadian National Collection of Insects, Arachnids and Nematodes |
| <i>Macaria decorata</i>        | ENT991-010309      | GWNR040-07  | HQ648726 | Canada        | British Columbia | Royal British Columbia Museum                                    |
| <i>Macaria decorata</i>        | UASM41387          | GWNS023-07  | HQ648724 | Canada        | Alberta          | Strickland Museum of Entomology, University of Alberta           |
| <i>Macaria decorata</i>        | UASM59968          | GWNS005-07  | HQ648725 | Canada        | Alberta          | Strickland Museum of Entomology, University of Alberta           |
| <i>Macaria exauspicata</i>     | 08-JDWBC-2328      | LBCG2328-09 | HQ648734 | Canada        | British Columbia | Spencer Entomological Museum, UBC                                |
| <i>Macaria exauspicata</i>     | 08-JDWBC-2332      | LBCG2332-09 | HQ648735 | Canada        | British Columbia | Spencer Entomological Museum, UBC                                |
| <i>Macaria exauspicata</i>     | Dun-08-111         | DUNLP111-08 | HQ648731 | Canada        | British Columbia | Pacific Forestry Centre, Canadian Forest Service                 |
| <i>Macaria exauspicata</i>     | ENT002-001539      | GWNR022-07  | HQ648733 | Canada        | British Columbia | Royal British Columbia Museum                                    |
| <i>Macaria exauspicata</i>     | UASM41341          | GWNS021-07  | HQ648732 | Canada        | Alberta          | Strickland Museum of Entomology, University of Alberta           |
| <i>Macaria loritaria</i>       | CNCLEP00033033     | GWNC034-07  | HQ648736 | Canada        | Yukon Territory  | Canadian National Collection of Insects, Arachnids and Nematodes |
| <i>Macaria loritaria</i>       | ENT002-001537      | GWNR024-07  | HQ648742 | Canada        | British Columbia | Royal British Columbia Museum                                    |
| <i>Macaria loritaria</i>       | ENT002-001538      | GWNR023-07  | HQ648743 | Canada        | British Columbia | Royal British Columbia Museum                                    |
| <i>Macaria loritaria</i>       | ENT992-021184      | GWNR025-07  | HQ648741 | Canada        | British Columbia | Royal British Columbia Museum                                    |
| <i>Macaria loritaria</i>       | ENT996-003181      | GWNR020-07  | HQ648744 | Canada        | British Columbia | Royal British Columbia Museum                                    |
| <i>Macaria loritaria</i>       | FFC-2007-0362      | GWNP152-07  | HQ648740 | Canada        | British Columbia | Pacific Forestry Centre, Canadian Forest Service                 |
| <i>Macaria loritaria</i>       | UASM35893          | GWNS020-07  | HQ648737 | Canada        | British Columbia | Strickland Museum of Entomology, University of Alberta           |
| <i>Macaria loritaria</i>       | UASM59140          | GWNS586-07  | HQ648745 | Canada        | Alberta          | Strickland Museum of Entomology, University of Alberta           |
| <i>Macaria loritaria</i>       | UASM7008           | GWNS018-07  | HQ648739 | Canada        | Alberta          | Strickland Museum of Entomology, University of Alberta           |
| <i>Macaria loritaria</i>       | UASM95793          | GWNS019-07  | HQ648738 | Canada        | Alberta          | Strickland Museum of Entomology, University of Alberta           |
| <i>Macaria lorquinaria</i>     | CNCLEP00033053     | GWNC054-07  | HQ648747 | Canada        | British Columbia | Canadian National Collection of Insects, Arachnids and Nematodes |
| <i>Macaria lorquinaria</i>     | CNCLEP00033054     | GWNC055-07  | HQ648746 | Canada        | British Columbia | Canadian National Collection of Insects, Arachnids and Nematodes |
| <i>Macaria lorquinaria</i>     | ENT996-003197      | GWNR074-07  | HQ648751 | Canada        | British Columbia | Royal British Columbia Museum                                    |
| <i>Macaria lorquinaria</i>     | ENT996-003264      | GWNR073-07  | HQ648752 | Canada        | British Columbia | Royal British Columbia Museum                                    |
| <i>Macaria lorquinaria</i>     | JECW-07-0009       | GWNJ009-07  | HQ648748 | United States | Washington       | James Entomological Collection, Washington State University      |
| <i>Macaria lorquinaria</i>     | JECW-07-0010       | GWNJ010-07  | HQ648749 | Canada        | British Columbia | James Entomological Collection, Washington State University      |

|                               |                    |             |          |               |                  |                                                                  |
|-------------------------------|--------------------|-------------|----------|---------------|------------------|------------------------------------------------------------------|
| <i>Macaria lorquinaria</i>    | PFC-2007-0363      | GWNP153-07  | HQ648750 | Canada        | British Columbia | Pacific Forestry Centre, Canadian Forest Service                 |
| <i>Macaria lorquinaria</i>    | WFBM-07-0002       | GWNN002-07  | HQ648753 | United States | Idaho            | University of Idaho, W. F. Barr Entomological Collection         |
| <i>Macaria masquerata</i>     | 10-GOBCL-02        | GOBCL002-10 | HQ648754 | United States | California       | Barcode of Life Data System                                      |
| <i>Macaria occiduaris</i>     | CNLEP00033012      | GWNC013-07  | HQ648755 | Canada        | British Columbia | Canadian National Collection of Insects, Arachnids and Nematodes |
| <i>Macaria occiduaris</i>     | CNLEP00033014      | GWNC015-07  | HQ648757 | Canada        | Yukon Territory  | Canadian National Collection of Insects, Arachnids and Nematodes |
| <i>Macaria occiduaris</i>     | CNLEP00033029      | GWNC030-07  | HQ648756 | Canada        | Yukon Territory  | Canadian National Collection of Insects, Arachnids and Nematodes |
| <i>Macaria occiduaris</i>     | ENT002-001530      | GWNR029-07  | HQ648761 | Canada        | British Columbia | Royal British Columbia Museum                                    |
| <i>Macaria occiduaris</i>     | ENT002-001531      | GWNR028-07  | HQ648762 | Canada        | British Columbia | Royal British Columbia Museum                                    |
| <i>Macaria occiduaris</i>     | ENT992-020794      | GWNR010-07  | HQ648766 | Canada        | British Columbia | Royal British Columbia Museum                                    |
| <i>Macaria occiduaris</i>     | ENT992-020795      | GWNR011-07  | HQ648765 | Canada        | British Columbia | Royal British Columbia Museum                                    |
| <i>Macaria occiduaris</i>     | ENT996-003175      | GWNR027-07  | HQ648763 | Canada        | British Columbia | Royal British Columbia Museum                                    |
| <i>Macaria occiduaris</i>     | ENT996-003176      | GWNR026-07  | HQ648764 | Canada        | Alberta          | Royal British Columbia Museum                                    |
| <i>Macaria occiduaris</i>     | JECW-07-0006       | GWNJ006-07  | HQ648758 | Canada        | British Columbia | James Entomological Collection, Washington State University      |
| <i>Macaria occiduaris</i>     | UASM58452          | GWNS010-07  | HQ648759 | Canada        | Alberta          | Strickland Museum of Entomology, University of Alberta           |
| <i>Macaria occiduaris</i>     | UASM77880          | GWNS009-07  | HQ648760 | Canada        | Alberta          | Strickland Museum of Entomology, University of Alberta           |
| <i>Macaria occiduaris</i>     | UASM78401          | GWNS563-07  | HQ648767 | Canada        | Alberta          | Strickland Museum of Entomology, University of Alberta           |
| <i>Macaria oweni</i>          | CNLEP00033344      | GWNC345-07  | HQ648769 | Canada        | Alberta          | Canadian National Collection of Insects, Arachnids and Nematodes |
| <i>Macaria oweni</i>          | CNLEP00033345      | GWNC346-07  | HQ648768 | Canada        | Alberta          | Canadian National Collection of Insects, Arachnids and Nematodes |
| <i>Macaria oweni</i>          | UASM29098          | GWNS590-07  | HQ648770 | Canada        | Alberta          | Strickland Museum of Entomology, University of Alberta           |
| <i>Macaria perplexata</i>     | WFBM-07-0012       | GWNN012-07  | HQ648772 | United States | Idaho            | University of Idaho, W. F. Barr Entomological Collection         |
| <i>Macaria perplexata</i>     | WFBM-07-0013       | GWNN013-07  | HQ648771 | United States | Idaho            | University of Idaho, W. F. Barr Entomological Collection         |
| <i>Macaria plumosata</i>      | 08-JDWBC-2117      | LBCG2117-09 | HQ648777 | Canada        | British Columbia | Spencer Entomological Museum, UBC                                |
| <i>Macaria plumosata</i>      | JECW-07-0025       | GWNJ025-07  | HQ648773 | United States | Washington       | James Entomological Collection, Washington State University      |
| <i>Macaria plumosata</i>      | JECW-07-0026       | GWNJ026-07  | HQ648775 | United States | Washington       | James Entomological Collection, Washington State University      |
| <i>Macaria plumosata</i>      | UASM58550          | GWNS022-07  | HQ648774 | Canada        | Alberta          | Strickland Museum of Entomology, University of Alberta           |
| <i>Macaria plumosata</i>      | WFBM-07-0004       | GWNN004-07  | HQ648776 | United States | Idaho            | University of Idaho, W. F. Barr Entomological Collection         |
| <i>Macaria quadrilinearia</i> | 08-JDWBC-3278      | LBCG3278-09 | HQ648782 | Canada        | British Columbia | Spencer Entomological Museum, UBC                                |
| <i>Macaria quadrilinearia</i> | JECW-07-0007       | GWNJ007-07  | HQ648779 | United States | Washington       | James Entomological Collection, Washington State University      |
| <i>Macaria quadrilinearia</i> | JECW-07-0008       | GWNJ008-07  | HQ648778 | United States | Washington       | James Entomological Collection, Washington State University      |
| <i>Macaria quadrilinearia</i> | UASM10896          | GWNS605-08  | HQ648780 | Canada        | Alberta          | Strickland Museum of Entomology, University of Alberta           |
| <i>Macaria quadrilinearia</i> | WFBM-07-0003       | GWNN003-07  | HQ648781 | United States | Idaho            | University of Idaho, W. F. Barr Entomological Collection         |
| <i>Macaria ribesaria</i>      | CNLEP00033307      | GWNC308-07  | HQ648783 | Canada        | Alberta          | Canadian National Collection of Insects, Arachnids and Nematodes |
| <i>Macaria sexmaculata</i>    | CNLEP00033342      | GWNC343-07  | HQ648785 | Canada        | British Columbia | Canadian National Collection of Insects, Arachnids and Nematodes |
| <i>Macaria sexmaculata</i>    | Dun-08-118         | DUNLP118-08 | HQ648784 | Canada        | British Columbia | Pacific Forestry Centre, Canadian Forest Service                 |
| <i>Macaria sexmaculata</i>    | ENT996-003275      | GWNR066-07  | HQ648791 | Canada        | British Columbia | Royal British Columbia Museum                                    |
| <i>Macaria sexmaculata</i>    | ENT996-003387      | GWNR050-07  | HQ648792 | Canada        | British Columbia | Royal British Columbia Museum                                    |
| <i>Macaria sexmaculata</i>    | PFC-2007-0348      | GWNP138-07  | HQ648790 | Canada        | British Columbia | Pacific Forestry Centre, Canadian Forest Service                 |
| <i>Macaria sexmaculata</i>    | PFC-2007-0349      | GWNP139-07  | HQ648789 | Canada        | British Columbia | Pacific Forestry Centre, Canadian Forest Service                 |
| <i>Macaria sexmaculata</i>    | UASM29082          | GWNS592-07  | HQ648793 | Canada        | Alberta          | Strickland Museum of Entomology, University of Alberta           |
| <i>Macaria sexmaculata</i>    | UASM29086          | GWNS589-07  | HQ648794 | Canada        | Alberta          | Strickland Museum of Entomology, University of Alberta           |
| <i>Macaria sexmaculata</i>    | UASM41343          | GWNS036-07  | HQ648787 | Canada        | Alberta          | Strickland Museum of Entomology, University of Alberta           |
| <i>Macaria sexmaculata</i>    | UASM53017          | GWNS039-07  | HQ648786 | Canada        | Alberta          | Strickland Museum of Entomology, University of Alberta           |
| <i>Macaria sexmaculata</i>    | UASM95794          | GWNS031-07  | HQ648788 | Canada        | Alberta          | Strickland Museum of Entomology, University of Alberta           |
| <i>Macaria signaria</i>       | 08-JDWBC-0031      | LBCG031-08  | HQ648827 | Canada        | British Columbia | Spencer Entomological Museum, UBC                                |
| <i>Macaria signaria</i>       | 08-JDWBC-0111      | LBCG111-08  | HQ648826 | Canada        | British Columbia | Spencer Entomological Museum, UBC                                |
| <i>Macaria signaria</i>       | 08-JDWBC-0113      | LBCG113-08  | HQ648825 | Canada        | British Columbia | Spencer Entomological Museum, UBC                                |
| <i>Macaria signaria</i>       | 08-JDWBC-0428      | LBCG428-08  | HQ648828 | Canada        | British Columbia | Spencer Entomological Museum, UBC                                |
| <i>Macaria signaria</i>       | CNLEP00033060      | GWNC061-07  | HQ648802 | Canada        | British Columbia | Canadian National Collection of Insects, Arachnids and Nematodes |
| <i>Macaria signaria</i>       | CNLEP00033061      | GWNC062-07  | HQ648803 | Canada        | Yukon Territory  | Canadian National Collection of Insects, Arachnids and Nematodes |
| <i>Macaria signaria</i>       | CNLEP00033062      | GWNC063-07  | HQ648801 | Canada        | British Columbia | Canadian National Collection of Insects, Arachnids and Nematodes |
| <i>Macaria signaria</i>       | CNLEP00033064      | GWNC065-07  | HQ648805 | Canada        | Alberta          | Canadian National Collection of Insects, Arachnids and Nematodes |
| <i>Macaria signaria</i>       | CNLEP00033328      | GWNC329-07  | HQ648804 | Canada        | Alberta          | Canadian National Collection of Insects, Arachnids and Nematodes |
| <i>Macaria signaria</i>       | CNLEP00033329      | GWNC330-07  | HQ648800 | Canada        | British Columbia | Canadian National Collection of Insects, Arachnids and Nematodes |
| <i>Macaria signaria</i>       | CNLEP00033330      | GWNC331-07  | HQ648799 | Canada        | British Columbia | Canadian National Collection of Insects, Arachnids and Nematodes |
| <i>Macaria signaria</i>       | Dun-08-116         | DUNLP116-08 | HQ648795 | Canada        | British Columbia | Pacific Forestry Centre, Canadian Forest Service                 |
| <i>Macaria signaria</i>       | Dun-08-117         | DUNLP117-08 | HQ648798 | Canada        | British Columbia | Pacific Forestry Centre, Canadian Forest Service                 |
| <i>Macaria signaria</i>       | Dun-08-119         | DUNLP119-08 | HQ648797 | Canada        | British Columbia | Pacific Forestry Centre, Canadian Forest Service                 |
| <i>Macaria signaria</i>       | Dun-08-120         | DUNLP120-08 | HQ648796 | Canada        | British Columbia | Pacific Forestry Centre, Canadian Forest Service                 |
| <i>Macaria signaria</i>       | ENT991-005635      | GWNR039-07  | HQ648818 | Canada        | British Columbia | Royal British Columbia Museum                                    |
| <i>Macaria signaria</i>       | ENT991-006782      | GWNR065-07  | HQ648816 | Canada        | British Columbia | Royal British Columbia Museum                                    |
| <i>Macaria signaria</i>       | ENT996-003311      | GWNR070-07  | HQ648815 | Canada        | British Columbia | Royal British Columbia Museum                                    |
| <i>Macaria signaria</i>       | ENT996-003345      | GWNR038-07  | HQ648819 | Canada        | British Columbia | Royal British Columbia Museum                                    |
| <i>Macaria signaria</i>       | ENT996-003391      | GWNR061-07  | HQ648817 | Canada        | British Columbia | Royal British Columbia Museum                                    |
| <i>Macaria signaria</i>       | JECW-07-0029       | GWNJ029-07  | HQ648806 | United States | Washington       | James Entomological Collection, Washington State University      |
| <i>Macaria signaria</i>       | NFRP-P-2007-100008 | GWNN008-07  | HQ648814 | Canada        | Alberta          | Northern Forestry Centre, Canadian Forest Service                |
| <i>Macaria signaria</i>       | PFC-2007-0346      | GWNP136-07  | HQ648813 | Canada        | British Columbia | Pacific Forestry Centre, Canadian Forest Service                 |
| <i>Macaria signaria</i>       | UASM29103          | GWNS588-07  | HQ648821 | Canada        | Alberta          | Strickland Museum of Entomology, University of Alberta           |
| <i>Macaria signaria</i>       | UASM29104          | GWNS593-07  | HQ648820 | Canada        | Alberta          | Strickland Museum of Entomology, University of Alberta           |
| <i>Macaria signaria</i>       | UASM57987          | GWNS033-07  | HQ648811 | Canada        | Alberta          | Strickland Museum of Entomology, University of Alberta           |
| <i>Macaria signaria</i>       | UASM58013          | GWNS032-07  | HQ648812 | Canada        | Alberta          | Strickland Museum of Entomology, University of Alberta           |
| <i>Macaria signaria</i>       | UASM78410          | GWNS561-07  | HQ648823 | Canada        | Alberta          | Strickland Museum of Entomology, University of Alberta           |
| <i>Macaria signaria</i>       | UASM78411          | GWNS560-07  | HQ648824 | Canada        | Alberta          | Strickland Museum of Entomology, University of Alberta           |
| <i>Macaria signaria</i>       | UASM78412          | GWNS562-07  | HQ648822 | Canada        | Alberta          | Strickland Museum of Entomology, University of Alberta           |
| <i>Macaria signaria</i>       | UASM95795          | GWNS034-07  | HQ648810 | Canada        | Alberta          | Strickland Museum of Entomology, University of Alberta           |
| <i>Macaria signaria</i>       | UASM95796          | GWNS035-07  | HQ648809 | Canada        | Alberta          | Strickland Museum of Entomology, University of Alberta           |
| <i>Macaria signaria</i>       | UASM95797          | GWNS037-07  | HQ648808 | Canada        | Alberta          | Strickland Museum of Entomology, University of Alberta           |
| <i>Macaria signaria</i>       | UASM95954          | GWNS608-08  | HQ648807 | Canada        | Alberta          | Strickland Museum of Entomology, University of Alberta           |
| <i>Macaria simplex</i>        | CNLEP00033337      | GWNC338-07  | HQ648830 | Canada        | Alberta          | Canadian National Collection of Insects, Arachnids and Nematodes |
| <i>Macaria simplex</i>        | CNLEP00033338      | GWNC339-07  | HQ648829 | Canada        | Alberta          | Canadian National Collection of Insects, Arachnids and Nematodes |
| <i>Macaria simplex</i>        | JD1136             | GWNS506-07  | HQ648833 | Canada        | Alberta          | Strickland Museum of Entomology, University of Alberta           |
| <i>Macaria simplex</i>        | NFRP-P-2007-100098 | GWNN114-07  | HQ648832 | Canada        | Alberta          | Northern Forestry Centre, Canadian Forest Service                |
| <i>Macaria simplex</i>        | NFRP-P-2007-100099 | GWNN115-07  | HQ648831 | Canada        | Alberta          | Northern Forestry Centre, Canadian Forest Service                |
| <i>Macaria simplex</i>        | WFBM-07-0005       | GWNN005-07  | HQ648834 | United States | Idaho            | University of Idaho, W. F. Barr Entomological Collection         |
| <i>Macaria sp.</i>            | JECW-07-0005       | GWNJ005-07  | HQ648835 | United States | Washington       | James Entomological Collection, Washington State University      |
| <i>Macaria sp. 1</i>          | PFC-2007-0355      | GWNP145-07  | HQ648836 | Canada        | British Columbia | Pacific Forestry Centre, Canadian Forest Service                 |
| <i>Macaria sp. 12</i>         | ENT002-001536      | GWNR009-07  | HQ648837 | Canada        | British Columbia | Royal British Columbia Museum                                    |
| <i>Macaria submarmorata</i>   | HLC-20854          | LBCA854-05  | HQ648841 | Canada        | British Columbia | Biodiversity Institute of Ontario                                |
| <i>Macaria submarmorata</i>   | HLC-20879          | LBCA879-05  | HQ648840 | Canada        | British Columbia | Biodiversity Institute of Ontario                                |
| <i>Macaria submarmorata</i>   | HLC-21174          | LBCB234-05  | HQ648839 | Canada        | British Columbia | Biodiversity Institute of Ontario                                |
| <i>Macaria submarmorata</i>   | HLC-21592          | LBCB652-05  | HQ648838 | Canada        | British Columbia | Biodiversity Institute of Ontario                                |
| <i>Macaria submarmorata</i>   | UASM29097          | GWNS591-07  | HQ648842 | Canada        | Alberta          | Strickland Museum of Entomology, University of Alberta           |
| <i>Macaria truncataria</i>    | CGWC-4101          | LOWCE341-06 | HQ648843 | Canada        | British Columbia | Biodiversity Institute of Ontario                                |
| <i>Macaria truncataria</i>    | CNLEP000333051     | GWNC052-07  | HQ648844 | Canada        | Yukon Territory  | Canadian National Collection of Insects, Arachnids and Nematodes |
| <i>Macaria truncataria</i>    | UASM41704          | GWNS025-07  | HQ648846 | Canada        | Alberta          | Strickland Museum of Entomology, University of Alberta           |
| <i>Macaria truncataria</i>    | UASM41832          | GWNS024-07  | HQ648847 | Canada        | Alberta          | Strickland Museum of Entomology, University of Alberta           |
| <i>Macaria truncataria</i>    | UASM53051          | GWNS026-07  | HQ648845 | Canada        | Alberta          | Strickland Museum of Entomology, University of Alberta           |
| <i>Macaria truncataria</i>    | UASM95870          | GWNS541-07  | HQ648848 | Canada        | Alberta          | Strickland Museum of Entomology, University of Alberta           |
| <i>Macaria ulsterata</i>      | CBCC806            | GWNS030-07  | HQ648850 | Canada        | Alberta          | Strickland Museum of Entomology, University of Alberta           |
| <i>Macaria ulsterata</i>      | CNLEP00033341      | GWNC342-07  | HQ648849 | Canada        | Alberta          | Canadian National Collection of Insects, Arachnids and Nematodes |
| <i>Macaria ulsterata</i>      | ENT002-001540      | GWNR072-07  | HQ648852 | Canada        | British Columbia | Royal British Columbia Museum                                    |
| <i>Macaria ulsterata</i>      | UASM53011          | GWNS028-07  | HQ648851 | Canada        | Alberta          | Strickland Museum of Entomology, University of Alberta           |
| <i>Macaria ulsterata</i>      | UASM78406          | GWNS564-07  | HQ648854 | Canada        | Alberta          | Strickland Museum of Entomology, University of Alberta           |
| <i>Macaria ulsterata</i>      | UASM78408          | GWNS566-07  | HQ648853 | Canada        | Alberta          | Strickland Museum of Entomology, University of Alberta           |
| <i>Melanolophia imitata</i>   | 07-JDWBC-0005      | GWND005-07  | HQ648871 | Canada        | British Columbia | Royal British Columbia Museum                                    |
| <i>Melanolophia imitata</i>   | 07-JDWBC-0006      | GWND006-07  | HQ648870 | Canada        | British Columbia | Royal British Columbia Museum                                    |
| <i>Melanolophia imitata</i>   | 07-JDWBC-0009      | GWND009-07  | HQ648869 | Canada        | British Columbia | Royal British Columbia Museum                                    |
| <i>Melanolophia imitata</i>   | 07-JDWBC-0010      | GWND010-07  | HQ648868 | Canada        | British Columbia | Royal British Columbia Museum                                    |

|                                 |                    |             |          |               |                  |                                                                  |
|---------------------------------|--------------------|-------------|----------|---------------|------------------|------------------------------------------------------------------|
| <i>Melanophila imitata</i>      | 07-JDWBC-0020      | GWND013-07  | HQ648867 | Canada        | British Columbia | Royal British Columbia Museum                                    |
| <i>Melanophila imitata</i>      | 07-JDWBC-0026      | GWND019-07  | HQ648866 | Canada        | British Columbia | Royal British Columbia Museum                                    |
| <i>Melanophila imitata</i>      | 07-JDWBC-0027      | GWND020-07  | HQ648865 | Canada        | British Columbia | Royal British Columbia Museum                                    |
| <i>Melanophila imitata</i>      | 07-JDWBC-0028      | GWND021-07  | HQ648864 | Canada        | British Columbia | Royal British Columbia Museum                                    |
| <i>Melanophila imitata</i>      | 07-JDWBC-0030      | GWND022-07  | HQ648863 | Canada        | British Columbia | Royal British Columbia Museum                                    |
| <i>Melanophila imitata</i>      | 07-JDWBC-0037      | GWND029-07  | HQ648862 | Canada        | British Columbia | Royal British Columbia Museum                                    |
| <i>Melanophila imitata</i>      | 07-JDWBC-0038      | GWND030-07  | HQ648861 | Canada        | British Columbia | Royal British Columbia Museum                                    |
| <i>Melanophila imitata</i>      | 07-JDWBC-0041      | GWND033-07  | HQ648860 | Canada        | British Columbia | Royal British Columbia Museum                                    |
| <i>Melanophila imitata</i>      | 07-JDWBC-0046      | GWND038-07  | HQ648859 | Canada        | British Columbia | Royal British Columbia Museum                                    |
| <i>Melanophila imitata</i>      | 08-JDWBC-0286      | LBCG286-08  | HQ648876 | Canada        | British Columbia | Spencer Entomological Museum, UBC                                |
| <i>Melanophila imitata</i>      | 08-JDWBC-0299      | LBCG299-08  | HQ648875 | Canada        | British Columbia | Spencer Entomological Museum, UBC                                |
| <i>Melanophila imitata</i>      | CNCLEP00033108     | GWNC109-07  | HQ648857 | Canada        | British Columbia | Canadian National Collection of Insects, Arachnids and Nematodes |
| <i>Melanophila imitata</i>      | CNCLEP00033109     | GWNC110-07  | HQ648856 | Canada        | British Columbia | Canadian National Collection of Insects, Arachnids and Nematodes |
| <i>Melanophila imitata</i>      | CNCLEP00033110     | GWNC111-07  | HQ648855 | United States | Washington       | Canadian National Collection of Insects, Arachnids and Nematodes |
| <i>Melanophila imitata</i>      | Dun-08-121         | DUNLP121-08 | HQ648855 | Canada        | British Columbia | Pacific Forestry Centre, Canadian Forest Service                 |
| <i>Melanophila imitata</i>      | ENT996-003599      | GWNR121-07  | HQ648874 | United States | Washington       | Royal British Columbia Museum                                    |
| <i>Melanophila imitata</i>      | ENT996-003608      | GWNR122-07  | HQ648873 | Canada        | British Columbia | Royal British Columbia Museum                                    |
| <i>Melanophila imitata</i>      | UASM59773          | GWNS085-07  | HQ648872 | Canada        | British Columbia | Strickland Museum of Entomology, University of Alberta           |
| <i>Meris suffusaria</i>         | ENT996-007535      | GWNR369-07  | HQ648878 | Canada        | British Columbia | Royal British Columbia Museum                                    |
| <i>Meris suffusaria</i>         | ENT996-007537      | GWNR370-07  | HQ648877 | Canada        | British Columbia | Royal British Columbia Museum                                    |
| <i>Mesoleuca gratulata</i>      | 07-JDWBC-0031      | GWND023-07  | HQ648881 | Canada        | British Columbia | Royal British Columbia Museum                                    |
| <i>Mesoleuca gratulata</i>      | 07-JDWBC-0032      | GWND024-07  | HQ648880 | Canada        | British Columbia | Royal British Columbia Museum                                    |
| <i>Mesoleuca gratulata</i>      | 07-JDWBC-0033      | GWND025-07  | HQ648879 | Canada        | British Columbia | Royal British Columbia Museum                                    |
| <i>Mesoleuca gratulata</i>      | ENT996-004381      | GWNR483-07  | HQ648886 | Canada        | British Columbia | Royal British Columbia Museum                                    |
| <i>Mesoleuca gratulata</i>      | ENT996-004395      | GWNR482-07  | HQ648887 | Canada        | British Columbia | Royal British Columbia Museum                                    |
| <i>Mesoleuca gratulata</i>      | NFRC-P-2007-100066 | GWNN066-07  | HQ648885 | Canada        | Alberta          | Northern Forestry Centre, Canadian Forest Service                |
| <i>Mesoleuca gratulata</i>      | PFC-2007-0328      | GWNP118-07  | HQ648884 | Canada        | British Columbia | Pacific Forestry Centre, Canadian Forest Service                 |
| <i>Mesoleuca gratulata</i>      | PFC-2007-0329      | GWNP119-07  | HQ648883 | Canada        | British Columbia | Pacific Forestry Centre, Canadian Forest Service                 |
| <i>Mesoleuca gratulata</i>      | UASM59733          | GWNS339-07  | HQ648882 | Canada        | British Columbia | Strickland Museum of Entomology, University of Alberta           |
| <i>Mesoleuca ruficollata</i>    | BCC1027            | GWNS337-07  | HQ648890 | Canada        | Alberta          | Strickland Museum of Entomology, University of Alberta           |
| <i>Mesoleuca ruficollata</i>    | ENT996-007757      | GWNR632-07  | HQ648895 | Canada        | British Columbia | Royal British Columbia Museum                                    |
| <i>Mesoleuca ruficollata</i>    | ENT996-007758      | GWNR633-07  | HQ648894 | Canada        | British Columbia | Royal British Columbia Museum                                    |
| <i>Mesoleuca ruficollata</i>    | ENT996-007759      | GWNR634-07  | HQ648893 | Canada        | British Columbia | Royal British Columbia Museum                                    |
| <i>Mesoleuca ruficollata</i>    | JECW-07-0149       | GWNJ149-07  | HQ648888 | United States | Idaho            | James Entomological Collection, Washington State University      |
| <i>Mesoleuca ruficollata</i>    | NFRC-P-2007-100065 | GWNN065-07  | HQ648892 | Canada        | Alberta          | Northern Forestry Centre, Canadian Forest Service                |
| <i>Mesoleuca ruficollata</i>    | PFC-2007-0327      | GWNP117-07  | HQ648891 | Canada        | British Columbia | Pacific Forestry Centre, Canadian Forest Service                 |
| <i>Mesoleuca ruficollata</i>    | UASM41839          | GWNS338-07  | HQ648889 | Canada        | Alberta          | Strickland Museum of Entomology, University of Alberta           |
| <i>Mesotheta incertata</i>      | ENT002-001647      | GWNR352-07  | HQ648898 | Canada        | British Columbia | Royal British Columbia Museum                                    |
| <i>Mesotheta incertata</i>      | ENT991-131363      | GWNR353-07  | HQ648897 | Canada        | British Columbia | Royal British Columbia Museum                                    |
| <i>Mesotheta incertata</i>      | ENT996-007624      | GWNR351-07  | HQ648899 | Canada        | British Columbia | Royal British Columbia Museum                                    |
| <i>Mesotheta incertata</i>      | JECW-07-0127       | GWNJ127-07  | HQ648896 | United States | Washington       | James Entomological Collection, Washington State University      |
| <i>Mesotheta incertata</i>      | UASM41831          | GWNS245-07  | HQ648900 | Canada        | Alberta          | Strickland Museum of Entomology, University of Alberta           |
| <i>Mesotheta incertata</i>      | UASM43220          | GWNS244-07  | HQ648901 | Canada        | Alberta          | Strickland Museum of Entomology, University of Alberta           |
| <i>Mesotheta incertata</i>      | UASM53025          | GWNS536-07  | HQ648903 | Canada        | Alberta          | Strickland Museum of Entomology, University of Alberta           |
| <i>Mesotheta incertata</i>      | UASM53026          | GWNS535-07  | HQ648904 | Canada        | Alberta          | Strickland Museum of Entomology, University of Alberta           |
| <i>Mesotheta incertata</i>      | UASM53028          | GWNS534-07  | HQ648905 | Canada        | Alberta          | Strickland Museum of Entomology, University of Alberta           |
| <i>Mesotheta incertata</i>      | UASM58231          | GWNS243-07  | HQ648902 | Canada        | Alberta          | Strickland Museum of Entomology, University of Alberta           |
| <i>Metanema determinata</i>     | CNCLEP00033189     | GWNC190-07  | HQ648907 | Canada        | British Columbia | Canadian National Collection of Insects, Arachnids and Nematodes |
| <i>Metanema determinata</i>     | CNCLEP00033191     | GWNC192-07  | HQ648906 | Canada        | British Columbia | Canadian National Collection of Insects, Arachnids and Nematodes |
| <i>Metanema determinata</i>     | UASM24858          | GWNS171-07  | HQ648909 | Canada        | Alberta          | Strickland Museum of Entomology, University of Alberta           |
| <i>Metanema determinata</i>     | UASM7068           | GWNS170-07  | HQ648910 | Canada        | Alberta          | Strickland Museum of Entomology, University of Alberta           |
| <i>Metanema determinata</i>     | UASM7356           | GWNS172-07  | HQ648908 | Canada        | Alberta          | Strickland Museum of Entomology, University of Alberta           |
| <i>Metanema inatomaria</i>      | CGW-0246           | LOWC246-05  | HQ648911 | Canada        | British Columbia | Biodiversity Institute of Ontario                                |
| <i>Metanema inatomaria</i>      | CGW-0247           | LOWC247-05  | HQ648913 | Canada        | British Columbia | Biodiversity Institute of Ontario                                |
| <i>Metanema inatomaria</i>      | CGW-0249           | LOWC249-05  | HQ648912 | Canada        | British Columbia | Biodiversity Institute of Ontario                                |
| <i>Metanema inatomaria</i>      | UASM43323          | GWNS169-07  | HQ648914 | Canada        | Alberta          | Strickland Museum of Entomology, University of Alberta           |
| <i>Metanema inatomaria</i>      | UASM44324          | GWNS167-07  | HQ648915 | Canada        | Alberta          | Strickland Museum of Entomology, University of Alberta           |
| <i>Metarranthis duaria</i>      | 08-JDWBC-0015      | LBCG015-08  | HQ648921 | Canada        | British Columbia | Spencer Entomological Museum, UBC                                |
| <i>Metarranthis duaria</i>      | CNCLEP00033193     | GWNC194-07  | HQ648916 | Canada        | British Columbia | Canadian National Collection of Insects, Arachnids and Nematodes |
| <i>Metarranthis duaria</i>      | ENT002-001616      | GWNR257-07  | HQ648923 | Canada        | British Columbia | Royal British Columbia Museum                                    |
| <i>Metarranthis duaria</i>      | ENT002-001620      | GWNR258-07  | HQ648922 | Canada        | British Columbia | Royal British Columbia Museum                                    |
| <i>Metarranthis duaria</i>      | UASM57075          | GWNS175-07  | HQ648917 | Canada        | Alberta          | Strickland Museum of Entomology, University of Alberta           |
| <i>Metarranthis duaria</i>      | UASM57418          | GWNS173-07  | HQ648919 | Canada        | Alberta          | Strickland Museum of Entomology, University of Alberta           |
| <i>Metarranthis duaria</i>      | UASM77970          | GWNS174-07  | HQ648918 | Canada        | Alberta          | Strickland Museum of Entomology, University of Alberta           |
| <i>Metarranthis duaria</i>      | WFBM-07-0054       | GWNW054-07  | HQ648920 | United States | Idaho            | University of Idaho, W. F. Barr Entomological Collection         |
| <i>Minoa murinata</i>           | 10-GOBCL-06        | GOBCL006-10 | HQ648924 | Germany       | Bavaria          | Barcode of Life Data System                                      |
| <i>Narraga fimetaria</i>        | UASM24786          | GWNS062-07  | HQ648926 | Canada        | Alberta          | Strickland Museum of Entomology, University of Alberta           |
| <i>Narraga fimetaria</i>        | UASM41590          | GWNS063-07  | HQ648925 | Canada        | Alberta          | Strickland Museum of Entomology, University of Alberta           |
| <i>Narraga fimetaria</i>        | WFBM-07-0018       | GWNW018-07  | HQ648927 | United States | Idaho            | University of Idaho, W. F. Barr Entomological Collection         |
| <i>Nematocampa resistaria</i>   | 08-JDWBC-3728      | LBCG3728-09 | HQ648944 | Canada        | British Columbia | Spencer Entomological Museum, UBC                                |
| <i>Nematocampa resistaria</i>   | 08-JDWBC-3729      | LBCG3729-09 | HQ648943 | Canada        | British Columbia | Spencer Entomological Museum, UBC                                |
| <i>Nematocampa resistaria</i>   | 08-JDWBC-3730      | LBCG3730-09 | HQ648942 | Canada        | British Columbia | Spencer Entomological Museum, UBC                                |
| <i>Nematocampa resistaria</i>   | 08-JDWBC-3731      | LBCG3731-09 | HQ648941 | Canada        | British Columbia | Spencer Entomological Museum, UBC                                |
| <i>Nematocampa resistaria</i>   | 08-JDWBC-3732      | LBCG3732-09 | HQ648940 | Canada        | British Columbia | Spencer Entomological Museum, UBC                                |
| <i>Nematocampa resistaria</i>   | 08-JDWBC-3734      | LBCG3734-09 | HQ648939 | Canada        | British Columbia | Spencer Entomological Museum, UBC                                |
| <i>Nematocampa resistaria</i>   | 08-JDWBC-3735      | LBCG3735-09 | HQ648938 | Canada        | British Columbia | Spencer Entomological Museum, UBC                                |
| <i>Nematocampa resistaria</i>   | CNCLEP00033236     | GWNC237-07  | HQ648929 | Canada        | British Columbia | Canadian National Collection of Insects, Arachnids and Nematodes |
| <i>Nematocampa resistaria</i>   | Dun-08-123         | DUNLP123-08 | HQ648928 | Canada        | British Columbia | Pacific Forestry Centre, Canadian Forest Service                 |
| <i>Nematocampa resistaria</i>   | ENT002-001642      | GWNR295-07  | HQ648935 | Canada        | British Columbia | Royal British Columbia Museum                                    |
| <i>Nematocampa resistaria</i>   | ENT991-008446      | GWNR293-07  | HQ648937 | Canada        | British Columbia | Royal British Columbia Museum                                    |
| <i>Nematocampa resistaria</i>   | ENT996-004162      | GWNR294-07  | HQ648936 | Canada        | British Columbia | Royal British Columbia Museum                                    |
| <i>Nematocampa resistaria</i>   | JECW-07-0113       | GWNJ113-07  | HQ648931 | United States | Idaho            | James Entomological Collection, Washington State University      |
| <i>Nematocampa resistaria</i>   | JECW-07-0114       | GWNJ114-07  | HQ648930 | United States | Washington       | James Entomological Collection, Washington State University      |
| <i>Nematocampa resistaria</i>   | UASM41325          | GWNS228-07  | HQ648933 | Canada        | Alberta          | Strickland Museum of Entomology, University of Alberta           |
| <i>Nematocampa resistaria</i>   | UASM43333          | GWNS229-07  | HQ648932 | Canada        | Alberta          | Strickland Museum of Entomology, University of Alberta           |
| <i>Nematocampa resistaria</i>   | UASM7120           | GWNS227-07  | HQ648934 | Canada        | Alberta          | Strickland Museum of Entomology, University of Alberta           |
| <i>Nemoria darwiniata</i>       | CNCLEP00033243     | GWNC244-07  | HQ648945 | Canada        | British Columbia | Canadian National Collection of Insects, Arachnids and Nematodes |
| <i>Nemoria darwiniata</i>       | CNCLEP00033244     | GWNC245-07  | HQ648946 | United States | Idaho            | Canadian National Collection of Insects, Arachnids and Nematodes |
| <i>Nemoria darwiniata</i>       | ENT996-004179      | GWNR355-07  | HQ648950 | Canada        | British Columbia | Royal British Columbia Museum                                    |
| <i>Nemoria darwiniata</i>       | ENT996-004187      | GWNR354-07  | HQ648951 | Canada        | British Columbia | Royal British Columbia Museum                                    |
| <i>Nemoria darwiniata</i>       | ENT996-004199      | GWNR356-07  | HQ648949 | Canada        | British Columbia | Royal British Columbia Museum                                    |
| <i>Nemoria darwiniata</i>       | JECW-07-0121       | GWNJ121-07  | HQ648947 | United States | Washington       | James Entomological Collection, Washington State University      |
| <i>Nemoria darwiniata</i>       | UASM38077          | GWNS235-07  | HQ648948 | Canada        | British Columbia | Strickland Museum of Entomology, University of Alberta           |
| <i>Nemoria glaucomarginaria</i> | JECW-07-0120       | GWNJ120-07  | HQ648952 | United States | Washington       | James Entomological Collection, Washington State University      |
| <i>Nemoria mimosaria</i>        | CNCLEP00033368     | GWNC369-07  | HQ648953 | Canada        | Alberta          | Canadian National Collection of Insects, Arachnids and Nematodes |
| <i>Nemoria mimosaria</i>        | UASM58029          | GWNS233-07  | HQ648955 | Canada        | Alberta          | Strickland Museum of Entomology, University of Alberta           |
| <i>Nemoria mimosaria</i>        | UASM7155           | GWNS234-07  | HQ648954 | Canada        | Alberta          | Strickland Museum of Entomology, University of Alberta           |
| <i>Nemoria rubrifrontaria</i>   | UASM41610          | GWNS236-07  | HQ648956 | Canada        | Alberta          | Strickland Museum of Entomology, University of Alberta           |
| <i>Nemoria unitaria</i>         | 08-JDWBC-2138      | LBCG2138-09 | HQ648965 | Canada        | British Columbia | Spencer Entomological Museum, UBC                                |
| <i>Nemoria unitaria</i>         | CNCLEP00033242     | GWNC243-07  | HQ648957 | Canada        | British Columbia | Canadian National Collection of Insects, Arachnids and Nematodes |
| <i>Nemoria unitaria</i>         | ENT996-004177      | GWNR360-07  | HQ648959 | Canada        | British Columbia | Royal British Columbia Museum                                    |
| <i>Nemoria unitaria</i>         | ENT996-004178      | GWNR361-07  | HQ648964 | Canada        | British Columbia | Royal British Columbia Museum                                    |
| <i>Nemoria unitaria</i>         | ENT996-007598      | GWNR362-07  | HQ648963 | Canada        | British Columbia | Royal British Columbia Museum                                    |
| <i>Nemoria unitaria</i>         | PFC-2007-0211      | GWNP004-07  | HQ648968 | Canada        | British Columbia | Pacific Forestry Centre, Canadian Forest Service                 |
| <i>Nemoria unitaria</i>         | UASM41585          | GWNS231-07  | HQ648961 | Canada        | Alberta          | Strickland Museum of Entomology, University of Alberta           |
| <i>Nemoria unitaria</i>         | UASM58124          | GWNS230-07  | HQ648962 | Canada        | Alberta          | Strickland Museum of Entomology, University of Alberta           |
| <i>Nemoria unitaria</i>         | UASM58137          | GWNS232-07  | HQ648960 | Canada        | Alberta          | Strickland Museum of Entomology, University of Alberta           |

|                                          |                    |             |          |               |                  |                                                                  |
|------------------------------------------|--------------------|-------------|----------|---------------|------------------|------------------------------------------------------------------|
| <i>Neocalis californiaria</i>            | Dun-08-124         | DUNLP124-08 | HQ648966 | Canada        | British Columbia | Pacific Forestry Centre, Canadian Forest Service                 |
| <i>Neocalis californiaria</i>            | ENT996-003421      | GWNR105-07  | HQ648971 | United States | Washington       | Royal British Columbia Museum                                    |
| <i>Neocalis californiaria</i>            | ENT996-003423      | GWNR108-07  | HQ648970 | United States | Washington       | Royal British Columbia Museum                                    |
| <i>Neocalis californiaria</i>            | PFC-2007-0367      | GWNP157-07  | HQ648969 | Canada        | British Columbia | Pacific Forestry Centre, Canadian Forest Service                 |
| <i>Neocalis californiaria</i>            | PFC-2007-0368      | GWNP158-07  | HQ648968 | Canada        | British Columbia | Pacific Forestry Centre, Canadian Forest Service                 |
| <i>Neocalis californiaria</i>            | UASM59628          | GWNS070-07  | HQ648967 | Canada        | Alberta          | Strickland Museum of Entomology, University of Alberta           |
| <i>Neoterpis trianguliferata</i>         | CBCC1055           | GWNS192-07  | HQ648975 | Canada        | Alberta          | Strickland Museum of Entomology, University of Alberta           |
| <i>Neoterpis trianguliferata</i>         | CNLEP00033203      | GWNC204-07  | HQ648972 | Canada        | British Columbia | Canadian National Collection of Insects, Arachnids and Nematodes |
| <i>Neoterpis trianguliferata</i>         | ENT996-004022      | GWNR297-07  | HQ648976 | Canada        | British Columbia | Royal British Columbia Museum                                    |
| <i>Neoterpis trianguliferata</i>         | ENT996-004024      | GWNR296-07  | HQ648977 | Canada        | British Columbia | Royal British Columbia Museum                                    |
| <i>Neoterpis trianguliferata</i>         | UASM24814          | GWNS194-07  | HQ648973 | Canada        | Alberta          | Strickland Museum of Entomology, University of Alberta           |
| <i>Neoterpis trianguliferata</i>         | UASM58783          | GWNS193-07  | HQ648974 | Canada        | Alberta          | Strickland Museum of Entomology, University of Alberta           |
| <i>Nepytia canosaria</i>                 | UASM24445          | GWNS202-07  | HQ648979 | Canada        | Alberta          | Strickland Museum of Entomology, University of Alberta           |
| <i>Nepytia canosaria</i>                 | UASM41851          | GWNS203-07  | HQ648978 | Canada        | Alberta          | Strickland Museum of Entomology, University of Alberta           |
| <i>Nepytia freemani</i>                  | ENT991-067681      | GWNR299-07  | HQ648985 | Canada        | British Columbia | Royal British Columbia Museum                                    |
| <i>Nepytia freemani</i>                  | ENT996-004045      | GWNR301-07  | HQ648983 | Canada        | British Columbia | Royal British Columbia Museum                                    |
| <i>Nepytia freemani</i>                  | ENT996-004047      | GWNR300-07  | HQ648984 | Canada        | British Columbia | Royal British Columbia Museum                                    |
| <i>Nepytia freemani</i>                  | JECW-07-0089       | GWNJ089-07  | HQ648982 | United States | Idaho            | James Entomological Collection, Washington State University      |
| <i>Nepytia freemani</i>                  | PFC-2007-0394      | GWNP184-07  | HQ648982 | Canada        | British Columbia | Pacific Forestry Centre, Canadian Forest Service                 |
| <i>Nepytia freemani</i>                  | PFC-2007-0395      | GWNP185-07  | HQ648981 | Canada        | British Columbia | Pacific Forestry Centre, Canadian Forest Service                 |
| <i>Nepytia phantasmaria</i>              | JECW-07-0090       | GWNJ090-07  | HQ648986 | United States | Washington       | James Entomological Collection, Washington State University      |
| <i>Nepytia phantasmaria</i>              | PFC-2007-0396      | GWNP186-07  | HQ648989 | Canada        | British Columbia | Pacific Forestry Centre, Canadian Forest Service                 |
| <i>Nepytia phantasmaria</i>              | PFC-2007-0397      | GWNP187-07  | HQ648988 | Canada        | British Columbia | Pacific Forestry Centre, Canadian Forest Service                 |
| <i>Nepytia phantasmaria</i>              | PFC-2007-0398      | GWNP188-07  | HQ648987 | Canada        | British Columbia | Pacific Forestry Centre, Canadian Forest Service                 |
| <i>Nepytia umbrsaria</i>                 | CNLEP00033365      | GWNC366-07  | HQ648991 | Canada        | British Columbia | Canadian National Collection of Insects, Arachnids and Nematodes |
| <i>Nepytia umbrsaria</i>                 | Dun-08-126         | DUNLP126-08 | HQ648990 | Canada        | British Columbia | Pacific Forestry Centre, Canadian Forest Service                 |
| <i>Nepytia umbrsaria</i>                 | ENT996-004036      | GWNR303-07  | HQ648993 | United States | Washington       | Royal British Columbia Museum                                    |
| <i>Nepytia umbrsaria</i>                 | PFC-2007-0392      | GWNP182-07  | HQ648992 | Canada        | British Columbia | Pacific Forestry Centre, Canadian Forest Service                 |
| <i>Operophtera bruceata</i>              | ENT002-001754      | GWNR601-07  | HQ648999 | Canada        | British Columbia | Royal British Columbia Museum                                    |
| <i>Operophtera bruceata</i>              | ENT996-005200      | GWNR599-07  | HQ649000 | Canada        | British Columbia | Royal British Columbia Museum                                    |
| <i>Operophtera bruceata</i>              | ENT996-005205      | GWNR597-07  | HQ649001 | Canada        | British Columbia | Royal British Columbia Museum                                    |
| <i>Operophtera bruceata</i>              | JECW-07-0181       | GWNJ181-07  | HQ648998 | United States | Washington       | James Entomological Collection, Washington State University      |
| <i>Operophtera bruceata</i>              | PFC-2007-0234      | GWNP027-07  | HQ648996 | Canada        | British Columbia | Pacific Forestry Centre, Canadian Forest Service                 |
| <i>Operophtera bruceata</i>              | UASM24791          | GWNS408-07  | HQ648994 | Canada        | Alberta          | Strickland Museum of Entomology, University of Alberta           |
| <i>Operophtera bruceata</i>              | UASM58424          | GWNS407-07  | HQ648995 | Canada        | Alberta          | Strickland Museum of Entomology, University of Alberta           |
| <i>Operophtera bruceata</i>              | WFBM-07-0086       | GWNV086-07  | HQ648997 | United States | Idaho            | University of Idaho, W. F. Barr Entomological Collection         |
| <i>Operophtera bruceata occidentalis</i> | 09-JDWGEO-451      | GNUA151-10  | HM392428 | United States | Alaska           | Smithsonian Institution                                          |
| <i>Operophtera bruceata occidentalis</i> | 09-JDWGEO-452      | GNUA152-10  | HM392429 | United States | Alaska           | Smithsonian Institution                                          |
| <i>Operophtera bruceata occidentalis</i> | 09-JDWGEO-453      | GNUA153-10  | HM392430 | United States | Oregon           | Smithsonian Institution                                          |
| <i>Operophtera bruceata occidentalis</i> | 09-JDWGEO-455      | GNUA155-10  | HM392431 | United States | Oregon           | Smithsonian Institution                                          |
| <i>Operophtera brumata</i>               | 08-JDWBC-3383      | LBCG3383-09 | HQ649012 | Canada        | British Columbia | Spencer Entomological Museum, UBC                                |
| <i>Operophtera brumata</i>               | 08-JDWBC-3395      | LBCG3395-09 | HQ649011 | Canada        | British Columbia | Spencer Entomological Museum, UBC                                |
| <i>Operophtera brumata</i>               | 08-JDWBC-3429      | LBCG3429-09 | HQ649010 | Canada        | British Columbia | Spencer Entomological Museum, UBC                                |
| <i>Operophtera brumata</i>               | 08-JDWBC-3430      | LBCG3430-09 | HQ649009 | Canada        | British Columbia | Spencer Entomological Museum, UBC                                |
| <i>Operophtera brumata</i>               | 08-JDWBC-3433      | LBCG3433-09 | HQ649008 | Canada        | British Columbia | Spencer Entomological Museum, UBC                                |
| <i>Operophtera brumata</i>               | 08-JDWBC-3434      | LBCG3434-09 | HQ649007 | Canada        | British Columbia | Spencer Entomological Museum, UBC                                |
| <i>Operophtera brumata</i>               | 08-JDWBC-3436      | LBCG3436-09 | HQ649006 | Canada        | British Columbia | Spencer Entomological Museum, UBC                                |
| <i>Operophtera brumata</i>               | CNLEP00020699      | GWNC709-07  | HQ649002 | Canada        | British Columbia | Canadian National Collection of Insects, Arachnids and Nematodes |
| <i>Operophtera brumata</i>               | CNLEP00035473      | GWNC707-07  | HQ649003 | Canada        | British Columbia | Canadian National Collection of Insects, Arachnids and Nematodes |
| <i>Operophtera brumata</i>               | PFC-2007-0235      | GWNP028-07  | HQ649005 | Canada        | British Columbia | Pacific Forestry Centre, Canadian Forest Service                 |
| <i>Operophtera brumata</i>               | PFC-2007-0236      | GWNP029-07  | HQ649004 | Canada        | British Columbia | Pacific Forestry Centre, Canadian Forest Service                 |
| <i>Operophtera danbyi</i>                | 09-JDWGEO-456      | GNUA156-10  | HM392432 | United States | Oregon           | Smithsonian Institution                                          |
| <i>Operophtera danbyi</i>                | 09-JDWGEO-458      | GNUA158-10  | HM392433 | United States | Oregon           | Smithsonian Institution                                          |
| <i>Orthofodonia exornata</i>             | CNLEP00033359      | GWNC360-07  | HQ649013 | Canada        | British Columbia | Canadian National Collection of Insects, Arachnids and Nematodes |
| <i>Orthofodonia exornata</i>             | ENT002-001543      | GWNR110-07  | HQ649014 | Canada        | British Columbia | Royal British Columbia Museum                                    |
| <i>Orthofodonia exornata</i>             | ENT996-003405      | GWNR109-07  | HQ649015 | Canada        | British Columbia | Royal British Columbia Museum                                    |
| <i>Orthofodonia tinctoria</i>            | NFRP-P-2007-100014 | GWNN014-07  | HQ649018 | Canada        | Alberta          | Northern Forestry Centre, Canadian Forest Service                |
| <i>Orthofodonia tinctoria</i>            | UASM58368          | GWNS067-07  | HQ649016 | Canada        | Alberta          | Strickland Museum of Entomology, University of Alberta           |
| <i>Orthofodonia tinctoria</i>            | UASM7010           | GWNS066-07  | HQ649017 | Canada        | Alberta          | Strickland Museum of Entomology, University of Alberta           |
| <i>Orthonama evansi</i>                  | CNLEP00033400      | GWNC401-07  | HQ649019 | Canada        | Alberta          | Canadian National Collection of Insects, Arachnids and Nematodes |
| <i>Orthonama evansi</i>                  | NFRP-P-2004-005616 | GWNN108-07  | HQ649020 | Canada        | Alberta          | Northern Forestry Centre, Canadian Forest Service                |
| <i>Orthonama evansi</i>                  | UASM19627          | GWNS397-07  | HQ649022 | Canada        | Alberta          | Strickland Museum of Entomology, University of Alberta           |
| <i>Orthonama evansi</i>                  | UASM24592          | GWNS398-07  | HQ649021 | Canada        | Alberta          | Strickland Museum of Entomology, University of Alberta           |
| <i>Orthonama evansipta</i>               | JECW-07-0167       | GWNJ167-07  | HQ649023 | United States | Washington       | James Entomological Collection, Washington State University      |
| <i>Pasiphila rectangulata</i>            | CNLEP00021542      | GWNC710-07  | HQ649024 | Canada        | British Columbia | Canadian National Collection of Insects, Arachnids and Nematodes |
| <i>Pasiphila rectangulata</i>            | JECW-07-0174       | GWNJ174-07  | HQ649028 | United States | Washington       | James Entomological Collection, Washington State University      |
| <i>Pasiphila rectangulata</i>            | PFC-2007-0279      | GWNP072-07  | HQ649027 | Canada        | British Columbia | Pacific Forestry Centre, Canadian Forest Service                 |
| <i>Pasiphila rectangulata</i>            | PFC-2007-0280      | GWNP073-07  | HQ649026 | Canada        | British Columbia | Pacific Forestry Centre, Canadian Forest Service                 |
| <i>Pasiphila rectangulata</i>            | PFC-2007-0281      | GWNP074-07  | HQ649025 | Canada        | British Columbia | Pacific Forestry Centre, Canadian Forest Service                 |
| <i>Perizoma basaliata</i>                | CNLEP00033409      | GWNC410-07  | HQ649029 | Canada        | Alberta          | Canadian National Collection of Insects, Arachnids and Nematodes |
| <i>Perizoma basaliata</i>                | UASM95819          | GWNS355-07  | HQ649031 | Canada        | Alberta          | Strickland Museum of Entomology, University of Alberta           |
| <i>Perizoma basaliata</i>                | UASM95820          | GWNS356-07  | HQ649030 | Canada        | Alberta          | Strickland Museum of Entomology, University of Alberta           |
| <i>Perizoma costiguttata</i>             | ENT996-004581      | GWNR486-07  | HQ649035 | Canada        | British Columbia | Royal British Columbia Museum                                    |
| <i>Perizoma costiguttata</i>             | JECW-07-0150       | GWNJ150-07  | HQ649033 | United States | Washington       | James Entomological Collection, Washington State University      |
| <i>Perizoma costiguttata</i>             | JECW-07-0151       | GWNJ151-07  | HQ649032 | United States | Idaho            | James Entomological Collection, Washington State University      |
| <i>Perizoma costiguttata</i>             | PFC-2007-0334      | GWNP124-07  | HQ649034 | Canada        | British Columbia | Pacific Forestry Centre, Canadian Forest Service                 |
| <i>Perizoma curvilinea</i>               | ENT996-004570      | GWNR487-07  | HQ649039 | United States | Washington       | Royal British Columbia Museum                                    |
| <i>Perizoma curvilinea</i>               | ENT996-004572      | GWNR489-07  | HQ649038 | United States | Washington       | Royal British Columbia Museum                                    |
| <i>Perizoma curvilinea</i>               | ENT996-004586      | GWNR485-07  | HQ649040 | United States | Washington       | Royal British Columbia Museum                                    |
| <i>Perizoma curvilinea</i>               | HLC-22938          | LBCD118-05  | HQ649036 | Canada        | British Columbia | Biodiversity Institute of Ontario                                |
| <i>Perizoma curvilinea</i>               | JECW-07-0152       | GWNJ152-07  | HQ649037 | United States | Washington       | James Entomological Collection, Washington State University      |
| <i>Perizoma custodiata</i>               | ENT002-001723      | GWNR569-07  | HQ649047 | Canada        | British Columbia | Royal British Columbia Museum                                    |
| <i>Perizoma custodiata</i>               | JD0085             | GWNS501-07  | HQ649046 | Canada        | Alberta          | Strickland Museum of Entomology, University of Alberta           |
| <i>Perizoma custodiata</i>               | JD0122             | GWNS503-07  | HQ649044 | Canada        | Alberta          | Strickland Museum of Entomology, University of Alberta           |
| <i>Perizoma custodiata</i>               | JD0123             | GWNS502-07  | HQ649045 | Canada        | Alberta          | Strickland Museum of Entomology, University of Alberta           |
| <i>Perizoma custodiata</i>               | UASM57478          | GWNS360-07  | HQ649041 | Canada        | Alberta          | Strickland Museum of Entomology, University of Alberta           |
| <i>Perizoma custodiata</i>               | UASM58053          | GWNS358-07  | HQ649043 | Canada        | Alberta          | Strickland Museum of Entomology, University of Alberta           |
| <i>Perizoma custodiata</i>               | UASM58656          | GWNS359-07  | HQ649042 | Canada        | Alberta          | Strickland Museum of Entomology, University of Alberta           |
| <i>Perizoma grandis</i>                  | ENT987-000065      | GWNR492-07  | HQ649051 | Canada        | British Columbia | Royal British Columbia Museum                                    |
| <i>Perizoma grandis</i>                  | ENT996-004549      | GWNR491-07  | HQ649052 | Canada        | British Columbia | Royal British Columbia Museum                                    |
| <i>Perizoma grandis</i>                  | ENT996-004602      | GWNR494-07  | HQ649050 | United States | Washington       | Royal British Columbia Museum                                    |
| <i>Perizoma grandis</i>                  | HLC-23028          | LBCD208-05  | HQ649048 | Canada        | British Columbia | Biodiversity Institute of Ontario                                |
| <i>Perizoma grandis</i>                  | UASM58892          | GWNS357-07  | HQ649049 | Canada        | Alberta          | Strickland Museum of Entomology, University of Alberta           |
| <i>Perizoma sp. 1</i>                    | JECW-07-0158       | GWNJ158-07  | HQ649053 | United States | Washington       | James Entomological Collection, Washington State University      |
| <i>Perizoma sp. 2</i>                    | JECW-07-0153       | GWNJ153-07  | HQ649055 | United States | Washington       | James Entomological Collection, Washington State University      |
| <i>Perizoma sp. 2</i>                    | JECW-07-0154       | GWNJ154-07  | HQ649054 | United States | Washington       | James Entomological Collection, Washington State University      |
| <i>Pero behrensaria</i>                  | Dun-08-127         | DUNLP127-08 | HQ649056 | Canada        | British Columbia | Pacific Forestry Centre, Canadian Forest Service                 |
| <i>Pero behrensaria</i>                  | ENT996-003865      | GWNR203-07  | HQ649060 | Canada        | British Columbia | Royal British Columbia Museum                                    |
| <i>Pero behrensaria</i>                  | ENT996-003868      | GWNR204-07  | HQ649059 | Canada        | British Columbia | Royal British Columbia Museum                                    |
| <i>Pero behrensaria</i>                  | ENT996-003887      | GWNR202-07  | HQ649061 | United States | Washington       | Royal British Columbia Museum                                    |
| <i>Pero behrensaria</i>                  | UASM95801          | GWNS143-07  | HQ649058 | Canada        | British Columbia | Strickland Museum of Entomology, University of Alberta           |
| <i>Pero behrensaria</i>                  | UASM95802          | GWNS144-07  | HQ649057 | Canada        | British Columbia | Strickland Museum of Entomology, University of Alberta           |
| <i>Pero honestaria</i>                   | ENT002-001602      | GWNR205-07  | HQ649065 | Canada        | British Columbia | Royal British Columbia Museum                                    |
| <i>Pero honestaria</i>                   | UASM41324          | GWNS134-07  | HQ649064 | Canada        | Alberta          | Strickland Museum of Entomology, University of Alberta           |
| <i>Pero honestaria</i>                   | UASM41790          | GWNS136-07  | HQ649062 | Canada        | Alberta          | Strickland Museum of Entomology, University of Alberta           |
| <i>Pero honestaria</i>                   | UASM56984          | GWNS135-07  | HQ649063 | Canada        | Alberta          | Strickland Museum of Entomology, University of Alberta           |
| <i>Pero mizon</i>                        | 08-JDWBC-0239      | LBCG239-08  | HQ649075 | Canada        | British Columbia | Spencer Entomological Museum, UBC                                |



|                                  |                 |             |          |               |                  |                                                                  |
|----------------------------------|-----------------|-------------|----------|---------------|------------------|------------------------------------------------------------------|
| <i>Pero mizon</i>                | 08-JDWBC-1066   | LBCG1066-09 | HQ649079 | Canada        | British Columbia | Spencer Entomological Museum, UBC                                |
| <i>Pero mizon</i>                | 08-JDWBC-1067   | LBCG1067-09 | HQ649078 | Canada        | British Columbia | Spencer Entomological Museum, UBC                                |
| <i>Pero mizon</i>                | 08-JDWBC-1072   | LBCG1072-09 | HQ649077 | Canada        | British Columbia | Spencer Entomological Museum, UBC                                |
| <i>Pero mizon</i>                | 08-JDWBC-1075   | LBCG1075-09 | HQ649076 | Canada        | British Columbia | Spencer Entomological Museum, UBC                                |
| <i>Pero mizon</i>                | 08-JDWBC-2104   | LBCG2104-09 | HQ649084 | Canada        | British Columbia | Spencer Entomological Museum, UBC                                |
| <i>Pero mizon</i>                | CNCLPEP00033168 | GWNC169-07  | HQ649070 | Canada        | British Columbia | Canadian National Collection of Insects, Arachnids and Nematodes |
| <i>Pero mizon</i>                | CNCLPEP00033170 | GWNC171-07  | HQ649069 | Canada        | British Columbia | Canadian National Collection of Insects, Arachnids and Nematodes |
| <i>Pero mizon</i>                | CNCLPEP00033171 | GWNC172-07  | HQ649068 | Canada        | British Columbia | Canadian National Collection of Insects, Arachnids and Nematodes |
| <i>Pero mizon</i>                | CNCLPEP00033361 | GWNC362-07  | HQ649067 | Canada        | British Columbia | Canadian National Collection of Insects, Arachnids and Nematodes |
| <i>Pero mizon</i>                | Dun-08-128      | DUNLP128-08 | HQ649066 | Canada        | British Columbia | Pacific Forestry Centre, Canadian Forest Service                 |
| <i>Pero mizon</i>                | ENT996-003835   | GWNR210-07  | HQ649080 | United States | Washington       | Royal British Columbia Museum                                    |
| <i>Pero mizon</i>                | ENT996-003838   | GWNR207-07  | HQ649082 | United States | Washington       | Royal British Columbia Museum                                    |
| <i>Pero mizon</i>                | ENT996-003840   | GWNR206-07  | HQ649083 | United States | Washington       | Royal British Columbia Museum                                    |
| <i>Pero mizon</i>                | ENT996-003842   | GWNR209-07  | HQ649081 | Canada        | British Columbia | Royal British Columbia Museum                                    |
| <i>Pero mizon</i>                | JECW-07-0068    | GWNJ068-07  | HQ649074 | United States | Idaho            | James Entomological Collection, Washington State University      |
| <i>Pero mizon</i>                | JECW-07-0069    | GWNJ069-07  | HQ649073 | United States | Washington       | James Entomological Collection, Washington State University      |
| <i>Pero mizon</i>                | JECW-07-0070    | GWNJ070-07  | HQ649072 | United States | Washington       | James Entomological Collection, Washington State University      |
| <i>Pero mizon</i>                | JECW-07-0071    | GWNJ071-07  | HQ649071 | United States | Washington       | James Entomological Collection, Washington State University      |
| <i>Pero morissonaria</i>         | ENT002-001603   | GWNR215-07  | HQ649087 | Canada        | British Columbia | Royal British Columbia Museum                                    |
| <i>Pero morissonaria</i>         | ENT996-003854   | GWNR214-07  | HQ649088 | Canada        | British Columbia | Royal British Columbia Museum                                    |
| <i>Pero morissonaria</i>         | ENT996-003864   | GWNR211-07  | HQ649089 | United States | Washington       | Royal British Columbia Museum                                    |
| <i>Pero morissonaria</i>         | UASM41994       | GWNS140-07  | HQ649085 | Canada        | Alberta          | Strickland Museum of Entomology, University of Alberta           |
| <i>Pero morissonaria</i>         | UASM7357        | GWNS139-07  | HQ649086 | Canada        | Alberta          | Strickland Museum of Entomology, University of Alberta           |
| <i>Pero occidentalis</i>         | 08-JDWBC-0028   | LBCG028-08  | HQ649097 | Canada        | British Columbia | Spencer Entomological Museum, UBC                                |
| <i>Pero occidentalis</i>         | 08-JDWBC-0029   | LBCG029-08  | HQ649096 | Canada        | British Columbia | Spencer Entomological Museum, UBC                                |
| <i>Pero occidentalis</i>         | 08-JDWBC-0030   | LBCG030-08  | HQ649095 | Canada        | British Columbia | Spencer Entomological Museum, UBC                                |
| <i>Pero occidentalis</i>         | 08-JDWBC-0333   | LBCG333-08  | HQ649094 | Canada        | British Columbia | Spencer Entomological Museum, UBC                                |
| <i>Pero occidentalis</i>         | 08-JDWBC-0359   | LBCG359-08  | HQ649093 | Canada        | British Columbia | Spencer Entomological Museum, UBC                                |
| <i>Pero occidentalis</i>         | CBC1057         | GWNS141-07  | HQ649090 | Canada        | Alberta          | Strickland Museum of Entomology, University of Alberta           |
| <i>Pero occidentalis</i>         | ENT996-003889   | GWNR216-07  | HQ649098 | Canada        | British Columbia | Royal British Columbia Museum                                    |
| <i>Pero occidentalis</i>         | UASM41795       | GWNS137-07  | HQ649092 | Canada        | Alberta          | Strickland Museum of Entomology, University of Alberta           |
| <i>Pero occidentalis</i>         | UASM58779       | GWNS138-07  | HQ649091 | Canada        | Alberta          | Strickland Museum of Entomology, University of Alberta           |
| <i>Phaeoura mexicanaria</i>      | 08-JDWBC-0410   | LBCG410-08  | HQ649101 | Canada        | British Columbia | Spencer Entomological Museum, UBC                                |
| <i>Phaeoura mexicanaria</i>      | 08-JDWBC-1064   | LBCG1064-09 | HQ649100 | Canada        | British Columbia | Spencer Entomological Museum, UBC                                |
| <i>Phaeoura mexicanaria</i>      | Dun-08-122      | DUNLP122-08 | HQ649099 | Canada        | British Columbia | Pacific Forestry Centre, Canadian Forest Service                 |
| <i>Phaeoura quernaria</i>        | UASM24079       | GWNS145-07  | HQ649102 | Canada        | Alberta          | Strickland Museum of Entomology, University of Alberta           |
| <i>Phigalia plumogeraria</i>     | CNCLPEP00033122 | GWNC123-07  | HQ649103 | Canada        | British Columbia | Canadian National Collection of Insects, Arachnids and Nematodes |
| <i>Phigalia plumogeraria</i>     | JECW-07-0046    | GWNJ046-07  | HQ649104 | United States | Washington       | James Entomological Collection, Washington State University      |
| <i>Phigalia plumogeraria</i>     | FFC-2007-0377   | GWNP167-07  | HQ649106 | Canada        | British Columbia | Pacific Forestry Centre, Canadian Forest Service                 |
| <i>Phigalia plumogeraria</i>     | FFC-2007-0378   | GWNP168-07  | HQ649105 | Canada        | British Columbia | Pacific Forestry Centre, Canadian Forest Service                 |
| <i>Philedia punctomacularia</i>  | ENT996-003963   | GWNR245-07  | HQ649110 | Canada        | British Columbia | Royal British Columbia Museum                                    |
| <i>Philedia punctomacularia</i>  | ENT996-003965   | GWNR244-07  | HQ649111 | Canada        | British Columbia | Royal British Columbia Museum                                    |
| <i>Philedia punctomacularia</i>  | JECW-07-0080    | GWNJ080-07  | HQ649108 | Canada        | British Columbia | James Entomological Collection, Washington State University      |
| <i>Philedia punctomacularia</i>  | JECW-07-0081    | GWNJ081-07  | HQ649107 | Canada        | British Columbia | James Entomological Collection, Washington State University      |
| <i>Philedia punctomacularia</i>  | FFC-2007-0385   | GWNP175-07  | HQ649109 | Canada        | British Columbia | Pacific Forestry Centre, Canadian Forest Service                 |
| <i>Plagidis alcolaria</i>        | UASM59681       | GWNS189-07  | HQ649114 | Canada        | Alberta          | Strickland Museum of Entomology, University of Alberta           |
| <i>Plagidis alcolaria</i>        | UASM7114        | GWNS191-07  | HQ649112 | Canada        | Alberta          | Strickland Museum of Entomology, University of Alberta           |
| <i>Plagidis alcolaria</i>        | UASM78417       | GWNS190-07  | HQ649113 | Canada        | Alberta          | Strickland Museum of Entomology, University of Alberta           |
| <i>Plagidis phlogosaria</i>      | 08-JDWBC-0004   | LBCG004-08  | HQ649118 | Canada        | British Columbia | Spencer Entomological Museum, UBC                                |
| <i>Plagidis phlogosaria</i>      | ENT996-004015   | GWNR260-07  | HQ649120 | Canada        | British Columbia | Royal British Columbia Museum                                    |
| <i>Plagidis phlogosaria</i>      | ENT996-004017   | GWNR261-07  | HQ649119 | Canada        | British Columbia | Royal British Columbia Museum                                    |
| <i>Plagidis phlogosaria</i>      | ENT996-004018   | GWNR259-07  | HQ649121 | Canada        | British Columbia | Royal British Columbia Museum                                    |
| <i>Plagidis phlogosaria</i>      | UASM57998       | GWNS187-07  | HQ649116 | Canada        | Alberta          | Strickland Museum of Entomology, University of Alberta           |
| <i>Plagidis phlogosaria</i>      | UASM58055       | GWNS188-07  | HQ649115 | Canada        | Alberta          | Strickland Museum of Entomology, University of Alberta           |
| <i>Plagidis phlogosaria</i>      | UASM78418       | GWNS186-07  | HQ649117 | Canada        | Alberta          | Strickland Museum of Entomology, University of Alberta           |
| <i>Plagidis pulveraria</i>       | 08-JDWBC-0273   | LBCG273-08  | HQ649126 | Canada        | British Columbia | Spencer Entomological Museum, UBC                                |
| <i>Plagidis pulveraria</i>       | CNCLPEP00033194 | GWNC195-07  | HQ649122 | Canada        | Alberta          | Canadian National Collection of Insects, Arachnids and Nematodes |
| <i>Plagidis pulveraria</i>       | ENT002-001622   | GWNR252-07  | HQ649127 | Canada        | British Columbia | Royal British Columbia Museum                                    |
| <i>Plagidis pulveraria</i>       | ENT996-003972   | GWNR250-07  | HQ649129 | Canada        | British Columbia | Royal British Columbia Museum                                    |
| <i>Plagidis pulveraria</i>       | ENT996-003977   | GWNR251-07  | HQ649128 | Canada        | British Columbia | Royal British Columbia Museum                                    |
| <i>Plagidis pulveraria</i>       | UASM43261       | GWNS178-07  | HQ649123 | Canada        | Alberta          | Strickland Museum of Entomology, University of Alberta           |
| <i>Plagidis pulveraria</i>       | UASM7111        | GWNS176-07  | HQ649125 | Canada        | Alberta          | Strickland Museum of Entomology, University of Alberta           |
| <i>Plagidis pulveraria</i>       | UASM78374       | GWNS177-07  | HQ649124 | Canada        | Alberta          | Strickland Museum of Entomology, University of Alberta           |
| <i>Plataea trilinearia</i>       | 08-JDWBC-0388   | LBCG388-08  | HQ649137 | Canada        | British Columbia | Spencer Entomological Museum, UBC                                |
| <i>Plataea trilinearia</i>       | ENT991-067013   | GWNR306-07  | HQ649136 | Canada        | British Columbia | Royal British Columbia Museum                                    |
| <i>Plataea trilinearia</i>       | ENT996-004114   | GWNR308-07  | HQ649135 | United States | Washington       | Royal British Columbia Museum                                    |
| <i>Plataea trilinearia</i>       | JECW-07-0093    | GWNJ093-07  | HQ649131 | United States | Idaho            | James Entomological Collection, Washington State University      |
| <i>Plataea trilinearia</i>       | JECW-07-0094    | GWNJ094-07  | HQ649130 | United States | Washington       | James Entomological Collection, Washington State University      |
| <i>Plataea trilinearia</i>       | UASM56974       | GWNS209-07  | HQ649132 | Canada        | Alberta          | Strickland Museum of Entomology, University of Alberta           |
| <i>Plataea trilinearia</i>       | UASM57124       | GWNS208-07  | HQ649133 | Canada        | Alberta          | Strickland Museum of Entomology, University of Alberta           |
| <i>Plataea trilinearia</i>       | UASM57504       | GWNS207-07  | HQ649134 | Canada        | Alberta          | Strickland Museum of Entomology, University of Alberta           |
| <i>Plemyria georgii</i>          | CNCLPEP00033381 | GWNC382-07  | HQ649138 | Canada        | Alberta          | Canadian National Collection of Insects, Arachnids and Nematodes |
| <i>Plemyria georgii</i>          | ENT002-001702   | GWNR499-07  | HQ649141 | Canada        | British Columbia | Royal British Columbia Museum                                    |
| <i>Plemyria georgii</i>          | ENT996-004462   | GWNR497-07  | HQ649143 | United States | Washington       | Royal British Columbia Museum                                    |
| <i>Plemyria georgii</i>          | ENT996-004463   | GWNR498-07  | HQ649142 | United States | Washington       | Royal British Columbia Museum                                    |
| <i>Plemyria georgii</i>          | FFC-2007-0287   | GWNP080-07  | HQ649139 | Canada        | British Columbia | Pacific Forestry Centre, Canadian Forest Service                 |
| <i>Plemyria georgii</i>          | UASM7321        | GWNS314-07  | HQ649140 | Canada        | Alberta          | Strickland Museum of Entomology, University of Alberta           |
| <i>Probole alienaria</i>         | CNCLPEP00033197 | GWNC198-07  | HQ649144 | Canada        | British Columbia | Canadian National Collection of Insects, Arachnids and Nematodes |
| <i>Probole alienaria</i>         | UASM41552       | GWNS603-07  | HQ649149 | Canada        | Alberta          | Strickland Museum of Entomology, University of Alberta           |
| <i>Probole alienaria</i>         | UASM57021       | GWNS184-07  | HQ649146 | Canada        | Alberta          | Strickland Museum of Entomology, University of Alberta           |
| <i>Probole alienaria</i>         | UASM57023       | GWNS183-07  | HQ649147 | Canada        | Alberta          | Strickland Museum of Entomology, University of Alberta           |
| <i>Probole alienaria</i>         | UASM57255       | GWNS182-07  | HQ649148 | Canada        | Alberta          | Strickland Museum of Entomology, University of Alberta           |
| <i>Probole alienaria</i>         | UASM57961       | GWNS185-07  | HQ649145 | Canada        | Alberta          | Strickland Museum of Entomology, University of Alberta           |
| <i>Probole amicania</i>          | ENT002-001623   | GWNR265-07  | HQ649154 | Canada        | British Columbia | Royal British Columbia Museum                                    |
| <i>Probole amicania</i>          | ENT002-001624   | GWNR264-07  | HQ649155 | Canada        | British Columbia | Royal British Columbia Museum                                    |
| <i>Probole amicania</i>          | ENT996-003984   | GWNR262-07  | HQ649156 | Canada        | British Columbia | Royal British Columbia Museum                                    |
| <i>Probole amicania</i>          | JECW-07-0083    | GWNJ083-07  | HQ649150 | United States | Washington       | James Entomological Collection, Washington State University      |
| <i>Probole amicania</i>          | UASM24040       | GWNS179-07  | HQ649153 | Canada        | Alberta          | Strickland Museum of Entomology, University of Alberta           |
| <i>Probole amicania</i>          | UASM7354        | GWNS180-07  | HQ649152 | Canada        | Alberta          | Strickland Museum of Entomology, University of Alberta           |
| <i>Probole amicania</i>          | UASM7400        | GWNS181-07  | HQ649151 | Canada        | Alberta          | Strickland Museum of Entomology, University of Alberta           |
| <i>Prochoerodes amplicinaria</i> | CNCLPEP00033227 | GWNC228-07  | HQ649160 | United States | Oregon           | Canadian National Collection of Insects, Arachnids and Nematodes |
| <i>Prochoerodes amplicinaria</i> | JECW-07-0102    | GWNJ102-07  | HQ649159 | United States | Washington       | James Entomological Collection, Washington State University      |
| <i>Prochoerodes amplicinaria</i> | JECW-07-0103    | GWNJ103-07  | HQ649158 | United States | Washington       | James Entomological Collection, Washington State University      |
| <i>Prochoerodes amplicinaria</i> | JECW-07-0104    | GWNJ104-07  | HQ649157 | United States | Washington       | James Entomological Collection, Washington State University      |
| <i>Prochoerodes forcifaria</i>   | 08-JDWBC-0021   | LBCG021-08  | HQ649175 | Canada        | British Columbia | Spencer Entomological Museum, UBC                                |
| <i>Prochoerodes forcifaria</i>   | 08-JDWBC-0022   | LBCG022-08  | HQ649174 | Canada        | British Columbia | Spencer Entomological Museum, UBC                                |
| <i>Prochoerodes forcifaria</i>   | 08-JDWBC-0095   | LBCG095-08  | HQ649173 | Canada        | British Columbia | Spencer Entomological Museum, UBC                                |
| <i>Prochoerodes forcifaria</i>   | 08-JDWBC-0098   | LBCG098-08  | HQ649172 | Canada        | British Columbia | Spencer Entomological Museum, UBC                                |
| <i>Prochoerodes forcifaria</i>   | 08-JDWBC-0099   | LBCG099-08  | HQ649171 | Canada        | British Columbia | Spencer Entomological Museum, UBC                                |
| <i>Prochoerodes forcifaria</i>   | 08-JDWBC-0100   | LBCG100-08  | HQ649170 | Canada        | British Columbia | Spencer Entomological Museum, UBC                                |
| <i>Prochoerodes forcifaria</i>   | 08-JDWBC-0102   | LBCG102-08  | HQ649169 | Canada        | British Columbia | Spencer Entomological Museum, UBC                                |
| <i>Prochoerodes forcifaria</i>   | 08-JDWBC-0107   | LBCG107-08  | HQ649168 | Canada        | British Columbia | Spencer Entomological Museum, UBC                                |
| <i>Prochoerodes forcifaria</i>   | CNCLPEP00033229 | GWNC230-07  | HQ649161 | Canada        | British Columbia | Canadian National Collection of Insects, Arachnids and Nematodes |
| <i>Prochoerodes forcifaria</i>   | ENT996-004142   | GWNR312-07  | HQ649166 | Canada        | British Columbia | Royal British Columbia Museum                                    |
| <i>Prochoerodes forcifaria</i>   | ENT996-004144   | GWNR313-07  | HQ649165 | Canada        | British Columbia | Royal British Columbia Museum                                    |
| <i>Prochoerodes forcifaria</i>   | ENT996-004148   | GWNR311-07  | HQ649167 | United States | Idaho            | Royal British Columbia Museum                                    |
| <i>Prochoerodes forcifaria</i>   | UASM41902       | GWNS222-07  | HQ649163 | Canada        | Alberta          | Strickland Museum of Entomology, University of Alberta           |

|                                |                    |             |          |               |                       |                                                                  |
|--------------------------------|--------------------|-------------|----------|---------------|-----------------------|------------------------------------------------------------------|
| <i>Prochoerodes forficaria</i> | UASM59317          | GWNS223-07  | HQ649162 | Canada        | Alberta               | Strickland Museum of Entomology, University of Alberta           |
| <i>Prochoerodes forficaria</i> | UASM95878          | GWNS549-07  | HQ649164 | Canada        | Alberta               | Strickland Museum of Entomology, University of Alberta           |
| <i>Prochoerodes lineola</i>    | ENT002-001635      | GWNR315-07  | HQ649180 | Canada        | British Columbia      | Royal British Columbia Museum                                    |
| <i>Prochoerodes lineola</i>    | ENT002-001636      | GWNR317-07  | HQ649178 | Canada        | British Columbia      | Royal British Columbia Museum                                    |
| <i>Prochoerodes lineola</i>    | ENT002-001638      | GWNR316-07  | HQ649179 | Canada        | British Columbia      | Royal British Columbia Museum                                    |
| <i>Prochoerodes lineola</i>    | UASM57974          | GWNS225-07  | HQ649177 | Canada        | Alberta               | Strickland Museum of Entomology, University of Alberta           |
| <i>Prochoerodes lineola</i>    | UASM58360          | GWNS226-07  | HQ649176 | Canada        | Alberta               | Strickland Museum of Entomology, University of Alberta           |
| <i>Prorella leucata</i>        | CGWC-1138          | LOWCB198-05 | HQ649184 | Canada        | British Columbia      | Biodiversity Institute of Ontario                                |
| <i>Prorella leucata</i>        | CGWC-1150          | LOWCB210-05 | HQ649183 | Canada        | British Columbia      | Biodiversity Institute of Ontario                                |
| <i>Prorella leucata</i>        | CGWC-1193          | LOWCB253-05 | HQ649182 | Canada        | British Columbia      | Biodiversity Institute of Ontario                                |
| <i>Prorella leucata</i>        | CGWC-1236          | LOWCB296-05 | HQ649181 | Canada        | British Columbia      | Biodiversity Institute of Ontario                                |
| <i>Prorella mellisa</i>        | 10-GOBCL-01        | GOBCL001-10 | HQ649185 | United States | Colorado              | Barcode of Life Data System                                      |
| <i>Protitame matilda</i>       | CNACLEP00033006    | GWNC007-07  | HQ649186 | Canada        | British Columbia      | Canadian National Collection of Insects, Arachnids and Nematodes |
| <i>Protitame matilda</i>       | ENT991-010195      | GWNR002-07  | HQ649190 | Canada        | British Columbia      | Royal British Columbia Museum                                    |
| <i>Protitame matilda</i>       | ENT996-003239      | GWNR003-07  | HQ649189 | Canada        | British Columbia      | Royal British Columbia Museum                                    |
| <i>Protitame matilda</i>       | ENT996-003241      | GWNR004-07  | HQ649188 | Canada        | British Columbia      | Royal British Columbia Museum                                    |
| <i>Protitame matilda</i>       | UASM59682          | GWNS003-07  | HQ649187 | Canada        | Alberta               | Strickland Museum of Entomology, University of Alberta           |
| <i>Protitame virginialis</i>   | ENT002-001585      | GWNR157-07  | HQ649198 | Canada        | British Columbia      | Royal British Columbia Museum                                    |
| <i>Protitame virginialis</i>   | ENT002-002417      | GWNR007-07  | HQ649195 | Canada        | British Columbia      | Royal British Columbia Museum                                    |
| <i>Protitame virginialis</i>   | ENT996-003255      | GWNR006-07  | HQ649196 | Canada        | British Columbia      | Royal British Columbia Museum                                    |
| <i>Protitame virginialis</i>   | ENT996-003259      | GWNR005-07  | HQ649197 | Canada        | British Columbia      | Royal British Columbia Museum                                    |
| <i>Protitame virginialis</i>   | FFC-2007-0360      | GWNP150-07  | HQ649194 | Canada        | British Columbia      | Pacific Forestry Centre, Canadian Forest Service                 |
| <i>Protitame virginialis</i>   | FFC-2007-0361      | GWNP151-07  | HQ649193 | Canada        | British Columbia      | Pacific Forestry Centre, Canadian Forest Service                 |
| <i>Protitame virginialis</i>   | UASM59070          | GWNS004-07  | HQ649192 | Canada        | Alberta               | Strickland Museum of Entomology, University of Alberta           |
| <i>Protitame virginialis</i>   | UASM59792          | GWNS005-07  | HQ649191 | Canada        | Alberta               | Strickland Museum of Entomology, University of Alberta           |
| <i>Protoboarmia porcelaria</i> | 08-JDWBC-1320      | LBCG1320-09 | HQ649207 | Canada        | British Columbia      | Spencer Entomological Museum, UBC                                |
| <i>Protoboarmia porcelaria</i> | 08-JDWBC-3279      | LBCG3279-09 | HQ649206 | Canada        | British Columbia      | Spencer Entomological Museum, UBC                                |
| <i>Protoboarmia porcelaria</i> | Dun-08-068         | DUNLP068-08 | HQ649199 | Canada        | British Columbia      | Pacific Forestry Centre, Canadian Forest Service                 |
| <i>Protoboarmia porcelaria</i> | ENT996-003603      | GWNR112-07  | HQ649203 | Canada        | British Columbia      | Royal British Columbia Museum                                    |
| <i>Protoboarmia porcelaria</i> | ENT996-003607      | GWNR111-07  | HQ649204 | Canada        | British Columbia      | Royal British Columbia Museum                                    |
| <i>Protoboarmia porcelaria</i> | ENT996-007538      | GWNR371-07  | HQ649205 | Canada        | British Columbia      | Royal British Columbia Museum                                    |
| <i>Protoboarmia porcelaria</i> | NFRC-P-2007-100019 | GWNN019-07  | HQ649202 | Canada        | Alberta               | Northern Forestry Centre, Canadian Forest Service                |
| <i>Protoboarmia porcelaria</i> | UASM41078          | GWNS082-07  | HQ649201 | Canada        | Alberta               | Strickland Museum of Entomology, University of Alberta           |
| <i>Protoboarmia porcelaria</i> | UASM41079          | GWNS083-07  | HQ649200 | Canada        | Alberta               | Strickland Museum of Entomology, University of Alberta           |
| <i>Psychophora phocata</i>     | CNACLEP00034133    | GWNC571-07  | HQ649209 | Canada        | Northwest Territories | Canadian National Collection of Insects, Arachnids and Nematodes |
| <i>Psychophora phocata</i>     | CNACLEP00034135    | GWNC573-07  | HQ649208 | Canada        | Northwest Territories | Canadian National Collection of Insects, Arachnids and Nematodes |
| <i>Psychophora sabini</i>      | CNACLEP00034127    | GWNC565-07  | HQ649213 | Canada        | Yukon Territory       | Canadian National Collection of Insects, Arachnids and Nematodes |
| <i>Psychophora sabini</i>      | CNACLEP00034128    | GWNC566-07  | HQ649212 | Canada        | Yukon Territory       | Canadian National Collection of Insects, Arachnids and Nematodes |
| <i>Psychophora sabini</i>      | CNACLEP00034132    | GWNC570-07  | HQ649211 | Canada        | Northwest Territories | Canadian National Collection of Insects, Arachnids and Nematodes |
| <i>Psychophora sabini</i>      | CNACLEP00034134    | GWNC572-07  | HQ649210 | Canada        | Northwest Territories | Canadian National Collection of Insects, Arachnids and Nematodes |
| <i>Psychophora sp. C</i>       | CNACLEP00034123    | GWNC560-07  | HQ649215 | Canada        | British Columbia      | Canadian National Collection of Insects, Arachnids and Nematodes |
| <i>Psychophora sp. C</i>       | CNACLEP00034122    | GWNC561-07  | HQ649214 | Canada        | British Columbia      | Canadian National Collection of Insects, Arachnids and Nematodes |
| <i>Psychophora sp. D</i>       | CNACLEP00034124    | GWNC562-07  | HQ649217 | Canada        | Yukon Territory       | Canadian National Collection of Insects, Arachnids and Nematodes |
| <i>Psychophora sp. D</i>       | CNACLEP00034125    | GWNC563-07  | HQ649216 | Canada        | Yukon Territory       | Canadian National Collection of Insects, Arachnids and Nematodes |
| <i>Psychophora sp. I</i>       | CNACLEP00034130    | GWNC568-07  | HQ649218 | Canada        | Yukon Territory       | Canadian National Collection of Insects, Arachnids and Nematodes |
| <i>Psychophora sp. I</i>       | CNACLEP00034131    | GWNC569-07  | HQ649219 | Canada        | Yukon Territory       | Canadian National Collection of Insects, Arachnids and Nematodes |
| <i>Psychophora suttoni</i>     | CNACLEP00033396    | GWNC397-07  | HQ649223 | Canada        | Yukon Territory       | Canadian National Collection of Insects, Arachnids and Nematodes |
| <i>Psychophora suttoni</i>     | CNACLEP00033397    | GWNC398-07  | HQ649221 | Canada        | British Columbia      | Canadian National Collection of Insects, Arachnids and Nematodes |
| <i>Psychophora suttoni</i>     | CNACLEP00034120    | GWNC558-07  | HQ649220 | Canada        | British Columbia      | Canadian National Collection of Insects, Arachnids and Nematodes |
| <i>Psychophora suttoni</i>     | CNACLEP00034121    | GWNC559-07  | HQ649222 | Canada        | Yukon Territory       | Canadian National Collection of Insects, Arachnids and Nematodes |
| <i>Rhumaptera hastata</i>      | CBCC1002           | GWNS327-07  | HQ649225 | Canada        | Alberta               | Strickland Museum of Entomology, University of Alberta           |
| <i>Rhumaptera hastata</i>      | CBCC1003           | GWNS328-07  | HQ649224 | Canada        | Alberta               | Strickland Museum of Entomology, University of Alberta           |
| <i>Rhumaptera hastata</i>      | ENT002-001704      | GWNR503-07  | HQ649226 | Canada        | British Columbia      | Royal British Columbia Museum                                    |
| <i>Rhumaptera hastata</i>      | ENT991-010371      | GWNR502-07  | HQ649227 | Canada        | British Columbia      | Royal British Columbia Museum                                    |
| <i>Rhumaptera hastata</i>      | ENT991-012205      | GWNR501-07  | HQ649228 | Canada        | British Columbia      | Royal British Columbia Museum                                    |
| <i>Rhumaptera hastata</i>      | ENT993-000269      | GWNR500-07  | HQ649229 | Canada        | British Columbia      | Royal British Columbia Museum                                    |
| <i>Rhumaptera subhastata</i>   | CNACLEP00034041    | GWNC479-07  | HQ649230 | Canada        | Alberta               | Canadian National Collection of Insects, Arachnids and Nematodes |
| <i>Rhumaptera subhastata</i>   | ENT991-004569      | GWNR507-07  | HQ649234 | Canada        | British Columbia      | Royal British Columbia Museum                                    |
| <i>Rhumaptera subhastata</i>   | ENT991-010126      | GWNR508-07  | HQ649237 | Canada        | British Columbia      | Royal British Columbia Museum                                    |
| <i>Rhumaptera subhastata</i>   | ENT991-012203      | GWNR504-07  | HQ649235 | Canada        | British Columbia      | Royal British Columbia Museum                                    |
| <i>Rhumaptera subhastata</i>   | ENT991-162271      | GWNR509-07  | HQ649236 | Canada        | British Columbia      | Royal British Columbia Museum                                    |
| <i>Rhumaptera subhastata</i>   | FFC-2007-0333      | GWNP123-07  | HQ649233 | Canada        | British Columbia      | Pacific Forestry Centre, Canadian Forest Service                 |
| <i>Rhumaptera subhastata</i>   | UASM41244          | GWNS329-07  | HQ649232 | Canada        | Alberta               | Strickland Museum of Entomology, University of Alberta           |
| <i>Rhumaptera subhastata</i>   | UASM41248          | GWNS330-07  | HQ649231 | Canada        | Alberta               | Strickland Museum of Entomology, University of Alberta           |
| <i>Rhumaptera undulata</i>     | ENT996-004377      | GWNR513-07  | HQ649242 | Canada        | British Columbia      | Royal British Columbia Museum                                    |
| <i>Rhumaptera undulata</i>     | HLC-21942          | LBCCO62-05  | HQ649238 | Canada        | British Columbia      | Biodiversity Institute of Ontario                                |
| <i>Rhumaptera undulata</i>     | FFC-2007-0248      | GWNP041-07  | HQ649241 | Canada        | British Columbia      | Pacific Forestry Centre, Canadian Forest Service                 |
| <i>Rhumaptera undulata</i>     | UASM7163           | GWNS325-07  | HQ649240 | Canada        | Alberta               | Strickland Museum of Entomology, University of Alberta           |
| <i>Rhumaptera undulata</i>     | UASM95812          | GWNS326-07  | HQ649239 | Canada        | Alberta               | Strickland Museum of Entomology, University of Alberta           |
| <i>Sabulodes edwardsata</i>    | CNACLEP00033230    | GWNC231-07  | HQ649249 | United States | Washington            | Canadian National Collection of Insects, Arachnids and Nematodes |
| <i>Sabulodes edwardsata</i>    | CNACLEP00033366    | GWNC367-07  | HQ649248 | Canada        | British Columbia      | Canadian National Collection of Insects, Arachnids and Nematodes |
| <i>Sabulodes edwardsata</i>    | Dun-08-129         | DUNLP129-08 | HQ649245 | Canada        | British Columbia      | Pacific Forestry Centre, Canadian Forest Service                 |
| <i>Sabulodes edwardsata</i>    | Dun-08-130         | DUNLP130-08 | HQ649247 | Canada        | British Columbia      | Pacific Forestry Centre, Canadian Forest Service                 |
| <i>Sabulodes edwardsata</i>    | Dun-08-131         | DUNLP131-08 | HQ649243 | Canada        | British Columbia      | Pacific Forestry Centre, Canadian Forest Service                 |
| <i>Sabulodes edwardsata</i>    | Dun-08-132         | DUNLP132-08 | HQ649246 | Canada        | British Columbia      | Pacific Forestry Centre, Canadian Forest Service                 |
| <i>Sabulodes edwardsata</i>    | Dun-08-133         | DUNLP133-08 | HQ649244 | Canada        | British Columbia      | Pacific Forestry Centre, Canadian Forest Service                 |
| <i>Sabulodes edwardsata</i>    | ENT996-004161      | GWNR320-07  | HQ649254 | Canada        | British Columbia      | Royal British Columbia Museum                                    |
| <i>Sabulodes edwardsata</i>    | JECW-07-0111       | GWNJ111-07  | HQ649251 | United States | Idaho                 | James Entomological Collection, Washington State University      |
| <i>Sabulodes edwardsata</i>    | JECW-07-0112       | GWNJ112-07  | HQ649250 | United States | Washington            | James Entomological Collection, Washington State University      |
| <i>Sabulodes edwardsata</i>    | FFC-2007-0388      | GWNP178-07  | HQ649253 | Canada        | British Columbia      | Pacific Forestry Centre, Canadian Forest Service                 |
| <i>Sabulodes edwardsata</i>    | WFBM-07-0070       | GWNW070-07  | HQ649252 | United States | Idaho                 | University of Idaho, W. F. Barr Entomological Collection         |
| <i>Scopula ancillata</i>       | CGWC-4358          | LOWCE598-06 | HQ649255 | Canada        | British Columbia      | Biodiversity Institute of Ontario                                |
| <i>Scopula ancillata</i>       | ENT002-002421      | GWNR392-07  | HQ649257 | Canada        | British Columbia      | Royal British Columbia Museum                                    |
| <i>Scopula ancillata</i>       | ENT996-004354      | GWNR391-07  | HQ649258 | Canada        | British Columbia      | Royal British Columbia Museum                                    |
| <i>Scopula ancillata</i>       | ENT996-004356      | GWNR390-07  | HQ649259 | Canada        | British Columbia      | Royal British Columbia Museum                                    |
| <i>Scopula ancillata</i>       | UASM58924          | GWNS254-07  | HQ649256 | Canada        | Alberta               | Strickland Museum of Entomology, University of Alberta           |
| <i>Scopula cacuminaria</i>     | UASM41306          | GWNS253-07  | HQ649260 | Canada        | Alberta               | Strickland Museum of Entomology, University of Alberta           |
| <i>Scopula frigidaria</i>      | CNACLEP00033372    | GWNC373-07  | HQ649261 | Canada        | Alberta               | Canadian National Collection of Insects, Arachnids and Nematodes |
| <i>Scopula frigidaria</i>      | ENT002-002418      | GWNR397-07  | HQ649268 | Canada        | British Columbia      | Royal British Columbia Museum                                    |
| <i>Scopula frigidaria</i>      | ENT996-004328      | GWNR396-07  | HQ649269 | United States | Washington            | Royal British Columbia Museum                                    |
| <i>Scopula frigidaria</i>      | UASM59260          | GWNS265-07  | HQ649262 | Canada        | Yukon Territory       | Strickland Museum of Entomology, University of Alberta           |
| <i>Scopula frigidaria</i>      | UASM78463          | GWNS264-07  | HQ649263 | Canada        | Alberta               | Strickland Museum of Entomology, University of Alberta           |
| <i>Scopula frigidaria</i>      | UASM95866          | GWNS538-07  | HQ649266 | Canada        | Alberta               | Strickland Museum of Entomology, University of Alberta           |
| <i>Scopula frigidaria</i>      | UASM95867          | GWNS539-07  | HQ649265 | Canada        | Alberta               | Strickland Museum of Entomology, University of Alberta           |
| <i>Scopula frigidaria</i>      | UASM95868          | GWNS537-07  | HQ649267 | Canada        | Alberta               | Strickland Museum of Entomology, University of Alberta           |
| <i>Scopula frigidaria</i>      | UASM95869          | GWNS540-07  | HQ649264 | Canada        | Alberta               | Strickland Museum of Entomology, University of Alberta           |
| <i>Scopula fuscata</i>         | WFBM-07-0076       | GWNW076-07  | HQ649270 | United States | Idaho                 | University of Idaho, W. F. Barr Entomological Collection         |
| <i>Scopula inductata</i>       | 08-JDWBC-0202      | LBCG202-08  | HQ649283 | Canada        | British Columbia      | Spencer Entomological Museum, UBC                                |
| <i>Scopula inductata</i>       | 08-JDWBC-1307      | LBCG1307-09 | HQ649290 | Canada        | British Columbia      | Spencer Entomological Museum, UBC                                |
| <i>Scopula inductata</i>       | 08-JDWBC-1308      | LBCG1308-09 | HQ649289 | Canada        | British Columbia      | Spencer Entomological Museum, UBC                                |
| <i>Scopula inductata</i>       | 08-JDWBC-1309      | LBCG1309-09 | HQ649288 | Canada        | British Columbia      | Spencer Entomological Museum, UBC                                |
| <i>Scopula inductata</i>       | 08-JDWBC-1311      | LBCG1311-09 | HQ649287 | Canada        | British Columbia      | Spencer Entomological Museum, UBC                                |
| <i>Scopula inductata</i>       | 08-JDWBC-1312      | LBCG1312-09 | HQ649286 | Canada        | British Columbia      | Spencer Entomological Museum, UBC                                |
| <i>Scopula inductata</i>       | 08-JDWBC-1313      | LBCG1313-09 | HQ649285 | Canada        | British Columbia      | Spencer Entomological Museum, UBC                                |
| <i>Scopula inductata</i>       | 08-JDWBC-1314      | LBCG1314-09 | HQ649284 | Canada        | British Columbia      | Spencer Entomological Museum, UBC                                |
| <i>Scopula inductata</i>       | CBCC1021           | GWNS271-07  | HQ649274 | Canada        | Alberta               | Strickland Museum of Entomology, University of Alberta           |
| <i>Scopula inductata</i>       | CNACLEP00033373    | GWNC374-07  | HQ649271 | Canada        | Alberta               | Canadian National Collection of Insects, Arachnids and Nematodes |

|                                |                    |             |          |               |                  |                                                                  |
|--------------------------------|--------------------|-------------|----------|---------------|------------------|------------------------------------------------------------------|
| <i>Scopula inductata</i>       | ENT002-001685      | GWNR398-07  | HQ649281 | Canada        | British Columbia | Royal British Columbia Museum                                    |
| <i>Scopula inductata</i>       | ENT002-001686      | GWNR400-07  | HQ649279 | Canada        | British Columbia | Royal British Columbia Museum                                    |
| <i>Scopula inductata</i>       | ENT002-001689      | GWNR399-07  | HQ649280 | Canada        | British Columbia | Royal British Columbia Museum                                    |
| <i>Scopula inductata</i>       | ENT996-004266      | GWNR380-07  | HQ649282 | United States | Washington       | Royal British Columbia Museum                                    |
| <i>Scopula inductata</i>       | JD1798             | GWNS507-07  | HQ649272 | Canada        | British Columbia | Strickland Museum of Entomology, University of Alberta           |
| <i>Scopula inductata</i>       | UASM41840          | GWNS268-07  | HQ649277 | Canada        | Alberta          | Strickland Museum of Entomology, University of Alberta           |
| <i>Scopula inductata</i>       | UASM57241          | GWNS270-07  | HQ649275 | Canada        | Alberta          | Strickland Museum of Entomology, University of Alberta           |
| <i>Scopula inductata</i>       | UASM58589          | GWNS269-07  | HQ649276 | Canada        | Alberta          | Strickland Museum of Entomology, University of Alberta           |
| <i>Scopula inductata</i>       | UASM58658          | GWNS267-07  | HQ649278 | Canada        | Alberta          | Strickland Museum of Entomology, University of Alberta           |
| <i>Scopula inductata</i>       | UASM59118          | GWNS272-07  | HQ649273 | Canada        | Alberta          | Strickland Museum of Entomology, University of Alberta           |
| <i>Scopula junctaria</i>       | 08-JDWBC-0112      | LBCG112-08  | HQ649304 | Canada        | British Columbia | Spencer Entomological Museum, UBC                                |
| <i>Scopula junctaria</i>       | ENT002-001653      | GWNR401-07  | HQ649303 | Canada        | British Columbia | Royal British Columbia Museum                                    |
| <i>Scopula junctaria</i>       | ENT002-001660      | GWNR403-07  | HQ649301 | Canada        | British Columbia | Royal British Columbia Museum                                    |
| <i>Scopula junctaria</i>       | ENT002-001661      | GWNR402-07  | HQ649302 | Canada        | British Columbia | Royal British Columbia Museum                                    |
| <i>Scopula junctaria</i>       | UASM59115          | GWNS256-07  | HQ649300 | Canada        | Alberta          | Strickland Museum of Entomology, University of Alberta           |
| <i>Scopula junctaria</i>       | UASM59143          | GWNS259-07  | HQ649297 | Canada        | Alberta          | Strickland Museum of Entomology, University of Alberta           |
| <i>Scopula junctaria</i>       | UASM7159           | GWNS258-07  | HQ649298 | Canada        | Alberta          | Strickland Museum of Entomology, University of Alberta           |
| <i>Scopula junctaria</i>       | UASM7318           | GWNS257-07  | HQ649299 | Canada        | Alberta          | Strickland Museum of Entomology, University of Alberta           |
| <i>Scopula junctaria</i>       | UASM95805          | GWNS260-07  | HQ649291 | Canada        | British Columbia | Strickland Museum of Entomology, University of Alberta           |
| <i>Scopula junctaria</i>       | UASM95837          | GWNS512-07  | HQ649295 | Canada        | Alberta          | Strickland Museum of Entomology, University of Alberta           |
| <i>Scopula junctaria</i>       | UASM95848          | GWNS513-07  | HQ649294 | Canada        | Alberta          | Strickland Museum of Entomology, University of Alberta           |
| <i>Scopula junctaria</i>       | UASM95850          | GWNS511-07  | HQ649296 | Canada        | Alberta          | Strickland Museum of Entomology, University of Alberta           |
| <i>Scopula junctaria</i>       | UASM95859          | GWNS514-07  | HQ649293 | Canada        | Alberta          | Strickland Museum of Entomology, University of Alberta           |
| <i>Scopula junctaria</i>       | UASM95860          | GWNS516-07  | HQ649292 | Canada        | Alberta          | Strickland Museum of Entomology, University of Alberta           |
| <i>Scopula limboudata</i>      | CNACLEP00033369    | GWNC370-07  | HQ649305 | Canada        | Alberta          | Canadian National Collection of Insects, Arachnids and Nematodes |
| <i>Scopula limboudata</i>      | UASM58451          | GWNS251-07  | HQ649307 | Canada        | Alberta          | Strickland Museum of Entomology, University of Alberta           |
| <i>Scopula limboudata</i>      | UASM95803          | GWNS252-07  | HQ649306 | Canada        | Alberta          | Strickland Museum of Entomology, University of Alberta           |
| <i>Scopula luteolata</i>       | 08-JDWBC-0009      | LBCG009-08  | HQ649314 | Canada        | British Columbia | Spencer Entomological Museum, UBC                                |
| <i>Scopula luteolata</i>       | 08-JDWBC-0109      | LBCG109-08  | HQ649313 | Canada        | British Columbia | Spencer Entomological Museum, UBC                                |
| <i>Scopula luteolata</i>       | 08-JDWBC-1306      | LBCG1306-09 | HQ649319 | Canada        | British Columbia | Spencer Entomological Museum, UBC                                |
| <i>Scopula luteolata</i>       | 08-JDWBC-1310      | LBCG1310-09 | HQ649318 | Canada        | British Columbia | Spencer Entomological Museum, UBC                                |
| <i>Scopula luteolata</i>       | 08-JDWBC-1315      | LBCG1315-09 | HQ649317 | Canada        | British Columbia | Spencer Entomological Museum, UBC                                |
| <i>Scopula luteolata</i>       | 08-JDWBC-1316      | LBCG1316-09 | HQ649316 | Canada        | British Columbia | Spencer Entomological Museum, UBC                                |
| <i>Scopula luteolata</i>       | 08-JDWBC-1317      | LBCG1317-09 | HQ649315 | Canada        | British Columbia | Spencer Entomological Museum, UBC                                |
| <i>Scopula luteolata</i>       | CNACLEP00033371    | GWNC372-07  | HQ649308 | Canada        | British Columbia | Canadian National Collection of Insects, Arachnids and Nematodes |
| <i>Scopula luteolata</i>       | ENT992-020651      | GWNR395-07  | HQ649311 | Canada        | British Columbia | Royal British Columbia Museum                                    |
| <i>Scopula luteolata</i>       | ENT996-004257      | GWNR381-07  | HQ649312 | Canada        | British Columbia | Royal British Columbia Museum                                    |
| <i>Scopula luteolata</i>       | JECW-07-0128       | GWNJ128-07  | HQ649309 | Canada        | British Columbia | James Entomological Collection, Washington State University      |
| <i>Scopula luteolata</i>       | UASM95810          | GWNS273-07  | HQ649310 | Canada        | British Columbia | Strickland Museum of Entomology, University of Alberta           |
| <i>Scopula quinquefasciata</i> | 08-JDWBC-0040      | LBCG040-08  | HQ649325 | Canada        | British Columbia | Spencer Entomological Museum, UBC                                |
| <i>Scopula quinquefasciata</i> | 08-JDWBC-0390      | LBCG390-08  | HQ649326 | Canada        | British Columbia | Spencer Entomological Museum, UBC                                |
| <i>Scopula quinquefasciata</i> | ENT991-005627      | GWNR405-07  | HQ649323 | Canada        | British Columbia | Royal British Columbia Museum                                    |
| <i>Scopula quinquefasciata</i> | ENT996-004301      | GWNR406-07  | HQ649322 | Canada        | British Columbia | Royal British Columbia Museum                                    |
| <i>Scopula quinquefasciata</i> | ENT996-004318      | GWNR404-07  | HQ649324 | United States | Washington       | Royal British Columbia Museum                                    |
| <i>Scopula quinquefasciata</i> | UASM95807          | GWNS262-07  | HQ649321 | Canada        | British Columbia | Strickland Museum of Entomology, University of Alberta           |
| <i>Scopula quinquefasciata</i> | UASM95808          | GWNS263-07  | HQ649320 | Canada        | British Columbia | Strickland Museum of Entomology, University of Alberta           |
| <i>Scopula sentaria</i>        | CNACLEP00033282    | GWNC283-07  | HQ649327 | Canada        | Yukon Territory  | Canadian National Collection of Insects, Arachnids and Nematodes |
| <i>Scopula sentaria</i>        | CNACLEP00033374    | GWNC375-07  | HQ649329 | Canada        | Alberta          | Canadian National Collection of Insects, Arachnids and Nematodes |
| <i>Scopula sentaria</i>        | CNACLEP00033375    | GWNC376-07  | HQ649328 | Canada        | Alberta          | Canadian National Collection of Insects, Arachnids and Nematodes |
| <i>Scopula sentaria</i>        | ENT002-001693      | GWNR411-07  | HQ649335 | Canada        | British Columbia | Royal British Columbia Museum                                    |
| <i>Scopula sentaria</i>        | ENT002-002420      | GWNR412-07  | HQ649334 | Canada        | British Columbia | Royal British Columbia Museum                                    |
| <i>Scopula sentaria</i>        | ENT991-164201      | GWNR409-07  | HQ649337 | Canada        | Alberta          | Royal British Columbia Museum                                    |
| <i>Scopula sentaria</i>        | ENT996-004342      | GWNR410-07  | HQ649336 | Canada        | Yukon Territory  | Royal British Columbia Museum                                    |
| <i>Scopula sentaria</i>        | UASM41060          | GWNS277-07  | HQ649332 | Canada        | Alberta          | Strickland Museum of Entomology, University of Alberta           |
| <i>Scopula sentaria</i>        | UASM58929          | GWNS276-07  | HQ649333 | Canada        | Alberta          | Strickland Museum of Entomology, University of Alberta           |
| <i>Scopula sentaria</i>        | UASM59239          | GWNS275-07  | HQ649331 | Canada        | Yukon Territory  | Strickland Museum of Entomology, University of Alberta           |
| <i>Scopula sentaria</i>        | UASM78376          | GWNS017-07  | HQ649330 | Canada        | Alberta          | Strickland Museum of Entomology, University of Alberta           |
| <i>Scopula septentrioncola</i> | CNACLEP00033274    | GWNC275-07  | HQ649338 | Canada        | Yukon Territory  | Canadian National Collection of Insects, Arachnids and Nematodes |
| <i>Scopula septentrioncola</i> | ENT996-004332      | GWNR414-07  | HQ649340 | Canada        | Yukon Territory  | Royal British Columbia Museum                                    |
| <i>Scopula septentrioncola</i> | UASM59203          | GWNS266-07  | HQ649339 | Canada        | Yukon Territory  | Strickland Museum of Entomology, University of Alberta           |
| <i>Scopula siccata</i>         | CNACLEP00033275    | GWNC276-07  | HQ649341 | Canada        | Alberta          | Canadian National Collection of Insects, Arachnids and Nematodes |
| <i>Scopula siccata</i>         | UASM59837          | GWNS279-07  | HQ649342 | Canada        | Alberta          | Strickland Museum of Entomology, University of Alberta           |
| <i>Scopula siccata</i>         | UASM59838          | GWNS278-07  | HQ649343 | Canada        | Alberta          | Strickland Museum of Entomology, University of Alberta           |
| <i>Scopula sideraria</i>       | ENT996-004340      | GWNR416-07  | HQ649344 | United States | Washington       | Royal British Columbia Museum                                    |
| <i>Scopula sp.</i>             | ENT996-004339      | GWNR415-07  | HQ649346 | United States | Washington       | Royal British Columbia Museum                                    |
| <i>Scopula sp.</i>             | ENT996-004341      | GWNR417-07  | HQ649345 | United States | Washington       | Royal British Columbia Museum                                    |
| <i>Selenia alciphearia</i>     | 07-JDWBC-0021      | GWND014-07  | HQ649350 | Canada        | British Columbia | Royal British Columbia Museum                                    |
| <i>Selenia alciphearia</i>     | 07-JDWBC-0049      | GWND041-07  | HQ649349 | Canada        | British Columbia | Royal British Columbia Museum                                    |
| <i>Selenia alciphearia</i>     | 08-JDWBC-0317      | LBCG317-08  | HQ649357 | Canada        | British Columbia | Spencer Entomological Museum, UBC                                |
| <i>Selenia alciphearia</i>     | CNACLEP00033186    | GWNC187-07  | HQ649347 | Canada        | Yukon Territory  | Canadian National Collection of Insects, Arachnids and Nematodes |
| <i>Selenia alciphearia</i>     | Dun-08-365         | DUNLP365-08 | HQ649348 | Canada        | British Columbia | Pacific Forestry Centre, Canadian Forest Service                 |
| <i>Selenia alciphearia</i>     | ENT002-001613      | GWNR270-07  | HQ649354 | Canada        | British Columbia | Royal British Columbia Museum                                    |
| <i>Selenia alciphearia</i>     | ENT991-006309      | GWNR267-07  | HQ649356 | Canada        | British Columbia | Royal British Columbia Museum                                    |
| <i>Selenia alciphearia</i>     | ENT996-004004      | GWNR268-07  | HQ649355 | Canada        | British Columbia | Royal British Columbia Museum                                    |
| <i>Selenia alciphearia</i>     | NFRP-P-2007-100030 | GWNN030-07  | HQ649353 | Canada        | Alberta          | Northern Forestry Centre, Canadian Forest Service                |
| <i>Selenia alciphearia</i>     | UASM24783          | GWNS164-07  | HQ649351 | Canada        | Alberta          | Strickland Museum of Entomology, University of Alberta           |
| <i>Selenia alciphearia</i>     | UASM41835          | GWNS163-07  | HQ649352 | Canada        | Alberta          | Strickland Museum of Entomology, University of Alberta           |
| <i>Selenia alciphearia</i>     | CNACLEP00033187    | GWNC188-07  | HQ649358 | Canada        | Alberta          | Canadian National Collection of Insects, Arachnids and Nematodes |
| <i>Selenia kentaria</i>        | UASM57995          | GWNS166-07  | HQ649359 | Canada        | Alberta          | Strickland Museum of Entomology, University of Alberta           |
| <i>Selenia kentaria</i>        | UASM57996          | GWNS165-07  | HQ649360 | Canada        | Alberta          | Strickland Museum of Entomology, University of Alberta           |
| <i>Sericosema juturnaria</i>   | 08-JDWBC-1076      | LBCG1076-09 | HQ649368 | Canada        | British Columbia | Spencer Entomological Museum, UBC                                |
| <i>Sericosema juturnaria</i>   | 08-JDWBC-1077      | LBCG1077-09 | HQ649367 | Canada        | British Columbia | Spencer Entomological Museum, UBC                                |
| <i>Sericosema juturnaria</i>   | CNACLEP00033129    | GWNC130-07  | HQ649362 | Canada        | British Columbia | Canadian National Collection of Insects, Arachnids and Nematodes |
| <i>Sericosema juturnaria</i>   | CNACLEP00033130    | GWNC131-07  | HQ649361 | Canada        | British Columbia | Canadian National Collection of Insects, Arachnids and Nematodes |
| <i>Sericosema juturnaria</i>   | ENT996-003709      | GWNR175-07  | HQ649369 | United States | Washington       | Royal British Columbia Museum                                    |
| <i>Sericosema juturnaria</i>   | JECW-07-0051       | GWNJ051-07  | HQ649363 | United States | Washington       | James Entomological Collection, Washington State University      |
| <i>Sericosema juturnaria</i>   | PFC-2007-0341      | GWNP131-07  | HQ649364 | Canada        | British Columbia | Pacific Forestry Centre, Canadian Forest Service                 |
| <i>Sericosema juturnaria</i>   | SEM-UBC-GEO-0125   | GWNU078-07  | HQ649366 | Canada        | British Columbia | Spencer Entomological Museum, UBC                                |
| <i>Sericosema juturnaria</i>   | WFBM-07-0034       | GWNW034-07  | HQ649365 | United States | Idaho            | University of Idaho, W. F. Barr Entomological Collection         |
| <i>Sericosema wilsonensis</i>  | CNACLEP00033131    | GWNC132-07  | HQ649370 | United States | Washington       | Canadian National Collection of Insects, Arachnids and Nematodes |
| <i>Sericosema wilsonensis</i>  | JECW-07-0052       | GWNJ052-07  | HQ649371 | United States | Idaho            | James Entomological Collection, Washington State University      |
| <i>Sericosema wilsonensis</i>  | PFC-2007-0342      | GWNP132-07  | HQ649372 | Canada        | British Columbia | Pacific Forestry Centre, Canadian Forest Service                 |
| <i>Sericosema wilsonensis</i>  | WFBM-07-0035       | GWNW035-07  | HQ649373 | United States | Idaho            | University of Idaho, W. F. Barr Entomological Collection         |
| <i>Sicya macularia</i>         | ENT002-001631      | GWNR325-07  | HQ649380 | Canada        | British Columbia | Royal British Columbia Museum                                    |
| <i>Sicya macularia</i>         | ENT996-004103      | GWNR322-07  | HQ649383 | Canada        | British Columbia | Royal British Columbia Museum                                    |
| <i>Sicya macularia</i>         | ENT996-004107      | GWNR324-07  | HQ649381 | Canada        | British Columbia | Royal British Columbia Museum                                    |
| <i>Sicya macularia</i>         | ENT996-004108      | GWNR323-07  | HQ649382 | Canada        | British Columbia | Royal British Columbia Museum                                    |
| <i>Sicya macularia</i>         | ENT996-004112      | GWNR321-07  | HQ649384 | United States | Washington       | Royal British Columbia Museum                                    |
| <i>Sicya macularia</i>         | JECW-07-0092       | GWNJ092-07  | HQ649374 | United States | Idaho            | James Entomological Collection, Washington State University      |
| <i>Sicya macularia</i>         | PFC-2007-0411      | GWNP201-07  | HQ649376 | Canada        | British Columbia | Pacific Forestry Centre, Canadian Forest Service                 |
| <i>Sicya macularia</i>         | PFC-2007-0412      | GWNP202-07  | HQ649375 | Canada        | British Columbia | Pacific Forestry Centre, Canadian Forest Service                 |
| <i>Sicya macularia</i>         | UASM24865          | GWNS205-07  | HQ649378 | Canada        | Alberta          | Strickland Museum of Entomology, University of Alberta           |
| <i>Sicya macularia</i>         | UASM24866          | GWNS206-07  | HQ649377 | Canada        | Alberta          | Strickland Museum of Entomology, University of Alberta           |
| <i>Sicya macularia</i>         | UASM7116           | GWNS204-07  | HQ649379 | Canada        | Alberta          | Strickland Museum of Entomology, University of Alberta           |
| <i>Spargania luctuata</i>      | ENT002-001705      | GWNR516-07  | HQ649388 | Canada        | British Columbia | Royal British Columbia Museum                                    |
| <i>Spargania luctuata</i>      | ENT991-004878      | GWNR515-07  | HQ649389 | Canada        | British Columbia | Royal British Columbia Museum                                    |
| <i>Spargania luctuata</i>      | ENT991-005586      | GWNR514-07  | HQ649390 | Canada        | British Columbia | Royal British Columbia Museum                                    |

|                                 |                 |             |          |               |                  |                                                                  |
|---------------------------------|-----------------|-------------|----------|---------------|------------------|------------------------------------------------------------------|
| <i>Spargania luctuata</i>       | UASM7164        | GWNS352-07  | HQ649387 | Canada        | Alberta          | Strickland Museum of Entomology, University of Alberta           |
| <i>Spargania luctuata</i>       | UASM7290        | GWNS353-07  | HQ649386 | Canada        | Alberta          | Strickland Museum of Entomology, University of Alberta           |
| <i>Spargania luctuata</i>       | UASM95818       | GWNS354-07  | HQ649385 | Canada        | Alberta          | Strickland Museum of Entomology, University of Alberta           |
| <i>Spargania magnoliata</i>     | 08-JDWBC-0003   | LBCG003-08  | HQ649392 | Canada        | British Columbia | Spencer Entomological Museum, UBC                                |
| <i>Spargania magnoliata</i>     | 08-JDWBC-1092   | LBCG1092-09 | HQ649393 | Canada        | British Columbia | Spencer Entomological Museum, UBC                                |
| <i>Spargania magnoliata</i>     | 08-JDWBC-3277   | LBCG3277-09 | HQ649394 | Canada        | British Columbia | Spencer Entomological Museum, UBC                                |
| <i>Spargania magnoliata</i>     | ENT992-020765   | GWNR519-07  | HQ649396 | Canada        | British Columbia | Royal British Columbia Museum                                    |
| <i>Spargania magnoliata</i>     | ENT996-004557   | GWNR517-07  | HQ649397 | Canada        | British Columbia | Royal British Columbia Museum                                    |
| <i>Spargania magnoliata</i>     | ENT996-004558   | GWNR520-07  | HQ649395 | United States | Washington       | Royal British Columbia Museum                                    |
| <i>Spargania magnoliata</i>     | UASM7334        | GWNS351-07  | HQ649391 | Canada        | Alberta          | Strickland Museum of Entomology, University of Alberta           |
| <i>Spodolepis danbyi</i>        | 08-JDWBC-0320   | LBCG320-08  | HQ649407 | Canada        | British Columbia | Spencer Entomological Museum, UBC                                |
| <i>Spodolepis danbyi</i>        | 08-JDWBC-0322   | LBCG322-08  | HQ649406 | Canada        | British Columbia | Spencer Entomological Museum, UBC                                |
| <i>Spodolepis danbyi</i>        | 08-JDWBC-0323   | LBCG323-08  | HQ649405 | Canada        | British Columbia | Spencer Entomological Museum, UBC                                |
| <i>Spodolepis danbyi</i>        | 08-JDWBC-0324   | LBCG324-08  | HQ649404 | Canada        | British Columbia | Spencer Entomological Museum, UBC                                |
| <i>Spodolepis danbyi</i>        | ENT996-003934   | GWNR243-07  | HQ649408 | Canada        | British Columbia | Royal British Columbia Museum                                    |
| <i>Spodolepis danbyi</i>        | ENT996-003945   | GWNR242-07  | HQ649409 | Canada        | British Columbia | Royal British Columbia Museum                                    |
| <i>Spodolepis danbyi</i>        | JECW-07-0078    | GWNJ078-07  | HQ649399 | United States | Washington       | James Entomological Collection, Washington State University      |
| <i>Spodolepis danbyi</i>        | JECW-07-0079    | GWNJ079-07  | HQ649398 | United States | Washington       | James Entomological Collection, Washington State University      |
| <i>Spodolepis danbyi</i>        | UASM24907       | GWNS156-07  | HQ649403 | Canada        | Alberta          | Strickland Museum of Entomology, University of Alberta           |
| <i>Spodolepis danbyi</i>        | UASM24908       | GWNS157-07  | HQ649402 | Canada        | Alberta          | Strickland Museum of Entomology, University of Alberta           |
| <i>Spodolepis danbyi</i>        | UASM41682       | GWNS158-07  | HQ649401 | Canada        | Alberta          | Strickland Museum of Entomology, University of Alberta           |
| <i>Spodolepis danbyi</i>        | UASM59745       | GWNS159-07  | HQ649400 | Canada        | British Columbia | Strickland Museum of Entomology, University of Alberta           |
| <i>Stannocentis morrisata</i>   | 08-JDWBC-0199   | LBCG199-08  | HQ649412 | Canada        | British Columbia | Spencer Entomological Museum, UBC                                |
| <i>Stannocentis morrisata</i>   | 08-JDWBC-1322   | LBCG1322-09 | HQ649427 | Canada        | British Columbia | Spencer Entomological Museum, UBC                                |
| <i>Stannocentis morrisata</i>   | 08-JDWBC-1323   | LBCG1323-09 | HQ649426 | Canada        | British Columbia | Spencer Entomological Museum, UBC                                |
| <i>Stannocentis morrisata</i>   | 08-JDWBC-1324   | LBCG1324-09 | HQ649425 | Canada        | British Columbia | Spencer Entomological Museum, UBC                                |
| <i>Stannocentis morrisata</i>   | 08-JDWBC-1325   | LBCG1325-09 | HQ649424 | Canada        | British Columbia | Spencer Entomological Museum, UBC                                |
| <i>Stannocentis morrisata</i>   | 08-JDWBC-1326   | LBCG1326-09 | HQ649423 | Canada        | British Columbia | Spencer Entomological Museum, UBC                                |
| <i>Stannocentis morrisata</i>   | 08-JDWBC-1327   | LBCG1327-09 | HQ649422 | Canada        | British Columbia | Spencer Entomological Museum, UBC                                |
| <i>Stannocentis morrisata</i>   | 08-JDWBC-1328   | LBCG1328-09 | HQ649421 | Canada        | British Columbia | Spencer Entomological Museum, UBC                                |
| <i>Stannocentis morrisata</i>   | 08-JDWBC-1329   | LBCG1329-09 | HQ649420 | Canada        | British Columbia | Spencer Entomological Museum, UBC                                |
| <i>Stannocentis morrisata</i>   | 08-JDWBC-1330   | LBCG1330-09 | HQ649419 | Canada        | British Columbia | Spencer Entomological Museum, UBC                                |
| <i>Stannocentis morrisata</i>   | 08-JDWBC-1331   | LBCG1331-09 | HQ649418 | Canada        | British Columbia | Spencer Entomological Museum, UBC                                |
| <i>Stannocentis morrisata</i>   | 08-JDWBC-1332   | LBCG1332-09 | HQ649417 | Canada        | British Columbia | Spencer Entomological Museum, UBC                                |
| <i>Stannocentis morrisata</i>   | 08-JDWBC-1333   | LBCG1333-09 | HQ649416 | Canada        | British Columbia | Spencer Entomological Museum, UBC                                |
| <i>Stannocentis morrisata</i>   | 08-JDWBC-1334   | LBCG1334-09 | HQ649415 | Canada        | British Columbia | Spencer Entomological Museum, UBC                                |
| <i>Stannocentis morrisata</i>   | 08-JDWBC-2118   | LBCG2118-09 | HQ649428 | Canada        | British Columbia | Spencer Entomological Museum, UBC                                |
| <i>Stannocentis morrisata</i>   | CNCLPEP00033318 | GWNC319-07  | HQ649411 | Canada        | British Columbia | Canadian National Collection of Insects, Arachnids and Nematodes |
| <i>Stannocentis morrisata</i>   | Dun-08-134      | DUNLP134-08 | HQ649410 | Canada        | British Columbia | Pacific Forestry Centre, Canadian Forest Service                 |
| <i>Stannocentis morrisata</i>   | ENT996-007781   | GWNR638-07  | HQ649414 | Canada        | British Columbia | Royal British Columbia Museum                                    |
| <i>Stannocentis morrisata</i>   | ENT996-007783   | GWNR639-07  | HQ649413 | Canada        | British Columbia | Royal British Columbia Museum                                    |
| <i>Stannocentis pearsalli</i>   | ENT996-004654   | GWNR533-07  | HQ649431 | Canada        | British Columbia | Royal British Columbia Museum                                    |
| <i>Stannocentis pearsalli</i>   | JECW-07-0215    | GWNJ215-07  | HQ649430 | United States | Washington       | James Entomological Collection, Washington State University      |
| <i>Stannocentis pearsalli</i>   | JECW-07-0216    | GWNJ216-07  | HQ649429 | United States | Washington       | James Entomological Collection, Washington State University      |
| <i>Stannodes blackmorei</i>     | PF2-2007-0294   | GWNP087-07  | HQ649432 | Canada        | British Columbia | Pacific Forestry Centre, Canadian Forest Service                 |
| <i>Stannodes marmorata</i>      | CNCLPEP00033316 | GWNC317-07  | HQ649434 | Canada        | British Columbia | Canadian National Collection of Insects, Arachnids and Nematodes |
| <i>Stannodes marmorata</i>      | CNCLPEP00033317 | GWNC318-07  | HQ649433 | Canada        | British Columbia | Canadian National Collection of Insects, Arachnids and Nematodes |
| <i>Stannodes marmorata</i>      | ENT991-012520   | GWNR528-07  | HQ649437 | Canada        | British Columbia | Royal British Columbia Museum                                    |
| <i>Stannodes marmorata</i>      | ENT996-004658   | GWNR527-07  | HQ649438 | United States | Washington       | Royal British Columbia Museum                                    |
| <i>Stannodes marmorata</i>      | JECW-07-0218    | GWNJ218-07  | HQ649436 | United States | Washington       | James Entomological Collection, Washington State University      |
| <i>Stannodes marmorata</i>      | JECW-07-0219    | GWNJ219-07  | HQ649435 | United States | Washington       | James Entomological Collection, Washington State University      |
| <i>Stannodes topazata</i>       | CGWC-4107       | LOWCE347-06 | HQ649439 | Canada        | British Columbia | Biodiversity Institute of Ontario                                |
| <i>Stannodes topazata</i>       | CNCLPEP00033319 | GWNC320-07  | HQ649441 | Canada        | Alberta          | Canadian National Collection of Insects, Arachnids and Nematodes |
| <i>Stannodes topazata</i>       | CNCLPEP00033320 | GWNC321-07  | HQ649440 | Canada        | Alberta          | Canadian National Collection of Insects, Arachnids and Nematodes |
| <i>Stannodes topazata</i>       | ENT002-001715   | GWNR537-07  | HQ649443 | Canada        | British Columbia | Royal British Columbia Museum                                    |
| <i>Stannodes topazata</i>       | UASM95821       | GWNS366-07  | HQ649442 | Canada        | Alberta          | Strickland Museum of Entomology, University of Alberta           |
| <i>Stenoporia excelsaria</i>    | 08-JDWBC-0016   | LBCG016-08  | HQ649451 | Canada        | British Columbia | Spencer Entomological Museum, UBC                                |
| <i>Stenoporia excelsaria</i>    | CNCLPEP00033092 | GWNC093-07  | HQ649446 | Canada        | British Columbia | Canadian National Collection of Insects, Arachnids and Nematodes |
| <i>Stenoporia excelsaria</i>    | CNCLPEP00033362 | GWNC363-07  | HQ649445 | Canada        | British Columbia | Canadian National Collection of Insects, Arachnids and Nematodes |
| <i>Stenoporia excelsaria</i>    | Dun-08-136      | DUNLP136-08 | HQ649444 | Canada        | British Columbia | Pacific Forestry Centre, Canadian Forest Service                 |
| <i>Stenoporia excelsaria</i>    | ENT996-003489   | GWNR113-07  | HQ649450 | Canada        | British Columbia | Royal British Columbia Museum                                    |
| <i>Stenoporia excelsaria</i>    | ENT996-003497   | GWNR114-07  | HQ649449 | Canada        | British Columbia | Royal British Columbia Museum                                    |
| <i>Stenoporia excelsaria</i>    | ENT996-003499   | GWNR115-07  | HQ649448 | Canada        | British Columbia | Royal British Columbia Museum                                    |
| <i>Stenoporia excelsaria</i>    | JECW-07-0037    | GWNJ037-07  | HQ649447 | Canada        | British Columbia | Royal British Columbia Museum                                    |
| <i>Stenoporia pulmonaria</i>    | CNCLPEP00033091 | GWNC092-07  | HQ649454 | Canada        | British Columbia | Canadian National Collection of Insects, Arachnids and Nematodes |
| <i>Stenoporia pulmonaria</i>    | Dun-08-135      | DUNLP135-08 | HQ649452 | Canada        | British Columbia | Pacific Forestry Centre, Canadian Forest Service                 |
| <i>Stenoporia pulmonaria</i>    | Dun-08-137      | DUNLP137-08 | HQ649453 | Canada        | British Columbia | Pacific Forestry Centre, Canadian Forest Service                 |
| <i>Stenoporia pulmonaria</i>    | JECW-07-0038    | GWNJ038-07  | HQ649456 | United States | Washington       | James Entomological Collection, Washington State University      |
| <i>Stenoporia pulmonaria</i>    | JECW-07-0039    | GWNJ039-07  | HQ649455 | United States | Washington       | James Entomological Collection, Washington State University      |
| <i>Stenoporia pulmonaria</i>    | JECW-07-0040    | GWNJ040-07  | HQ649457 | United States | Idaho            | James Entomological Collection, Washington State University      |
| <i>Stenoporia pulmonaria</i>    | PF2-2007-0371   | GWNP161-07  | HQ649460 | Canada        | British Columbia | Pacific Forestry Centre, Canadian Forest Service                 |
| <i>Stenoporia pulmonaria</i>    | PF2-2007-0374   | GWNP164-07  | HQ649459 | Canada        | British Columbia | Pacific Forestry Centre, Canadian Forest Service                 |
| <i>Stenoporia pulmonaria</i>    | PF2-2007-0375   | GWNP165-07  | HQ649461 | Canada        | British Columbia | Pacific Forestry Centre, Canadian Forest Service                 |
| <i>Stenoporia pulmonaria</i>    | UASM59366       | GWNS071-07  | HQ649458 | Canada        | Alberta          | Strickland Museum of Entomology, University of Alberta           |
| <i>Stenoporia separataria</i>   | 08-JDWBC-0362   | LBCG362-08  | HQ649466 | Canada        | British Columbia | Spencer Entomological Museum, UBC                                |
| <i>Stenoporia separataria</i>   | 08-JDWBC-0368   | LBCG368-08  | HQ649465 | Canada        | British Columbia | Spencer Entomological Museum, UBC                                |
| <i>Stenoporia separataria</i>   | BIRD1750        | GWNS072-07  | HQ649462 | Canada        | Alberta          | Strickland Museum of Entomology, University of Alberta           |
| <i>Stenoporia separataria</i>   | PF2-2007-0370   | GWNP160-07  | HQ649464 | Canada        | British Columbia | Pacific Forestry Centre, Canadian Forest Service                 |
| <i>Stenoporia separataria</i>   | PF2-2007-0372   | GWNP162-07  | HQ649463 | Canada        | British Columbia | Pacific Forestry Centre, Canadian Forest Service                 |
| <i>Stergamataea delicatulum</i> | WFBM-07-0044    | GWNW044-07  | HQ649467 | United States | Idaho            | University of Idaho, W. F. Barr Entomological Collection         |
| <i>Synaxis cervinaria</i>       | 08-JDWBC-0032   | LBCG032-08  | HQ649474 | Canada        | British Columbia | Spencer Entomological Museum, UBC                                |
| <i>Synaxis cervinaria</i>       | CNCLPEP00033222 | GWNC223-07  | HQ649468 | Canada        | British Columbia | Canadian National Collection of Insects, Arachnids and Nematodes |
| <i>Synaxis cervinaria</i>       | ENT996-004134   | GWNR330-07  | HQ649472 | Canada        | British Columbia | Royal British Columbia Museum                                    |
| <i>Synaxis cervinaria</i>       | ENT996-004139   | GWNR327-07  | HQ649473 | Canada        | British Columbia | Royal British Columbia Museum                                    |
| <i>Synaxis cervinaria</i>       | JECW-07-0095    | GWNJ095-07  | HQ649470 | United States | Idaho            | James Entomological Collection, Washington State University      |
| <i>Synaxis cervinaria</i>       | JECW-07-0096    | GWNJ096-07  | HQ649469 | United States | Washington       | James Entomological Collection, Washington State University      |
| <i>Synaxis cervinaria</i>       | UASM59738       | GWNS213-07  | HQ649471 | Canada        | British Columbia | Strickland Museum of Entomology, University of Alberta           |
| <i>Synaxis jubararia</i>        | ENT996-004071   | GWNR331-07  | HQ649483 | Canada        | British Columbia | Royal British Columbia Museum                                    |
| <i>Synaxis jubararia</i>        | ENT996-004117   | GWNR335-07  | HQ649478 | Canada        | British Columbia | Royal British Columbia Museum                                    |
| <i>Synaxis jubararia</i>        | ENT996-004119   | GWNR334-07  | HQ649482 | Canada        | British Columbia | Royal British Columbia Museum                                    |
| <i>Synaxis jubararia</i>        | JECW-07-0100    | GWNJ100-07  | HQ649475 | United States | Washington       | James Entomological Collection, Washington State University      |
| <i>Synaxis jubararia</i>        | PF2-2007-0415   | GWNP205-07  | HQ649477 | Canada        | British Columbia | Pacific Forestry Centre, Canadian Forest Service                 |
| <i>Synaxis jubararia</i>        | UASM34668       | GWNS210-07  | HQ649481 | Canada        | Alberta          | Strickland Museum of Entomology, University of Alberta           |
| <i>Synaxis jubararia</i>        | UASM58782       | GWNS214-07  | HQ649479 | Canada        | Alberta          | Strickland Museum of Entomology, University of Alberta           |
| <i>Synaxis jubararia</i>        | UASM59739       | GWNS212-07  | HQ649476 | Canada        | British Columbia | Strickland Museum of Entomology, University of Alberta           |
| <i>Synaxis jubararia</i>        | UASM7117        | GWNS211-07  | HQ649480 | Canada        | Alberta          | Strickland Museum of Entomology, University of Alberta           |
| <i>Synaxis pallulata</i>        | CGWC-0235       | LOWC235-05  | HQ649486 | Canada        | British Columbia | Biodiversity Institute of Ontario                                |
| <i>Synaxis pallulata</i>        | CGWC-0237       | LOWC237-05  | HQ649485 | Canada        | British Columbia | Biodiversity Institute of Ontario                                |
| <i>Synaxis pallulata</i>        | CGWC-0238       | LOWC238-05  | HQ649484 | Canada        | British Columbia | Biodiversity Institute of Ontario                                |
| <i>Synaxis pallulata</i>        | Dun-08-139      | DUNLP139-08 | HQ649487 | Canada        | British Columbia | Pacific Forestry Centre, Canadian Forest Service                 |
| <i>Synaxis pallulata</i>        | PF2-2007-0416   | GWNP206-07  | HQ649488 | Canada        | British Columbia | Pacific Forestry Centre, Canadian Forest Service                 |
| <i>Synaxis sp.</i>              | ENT996-004073   | GWNR333-07  | HQ649492 | Canada        | British Columbia | Royal British Columbia Museum                                    |
| <i>Synaxis sp.</i>              | UASM59626       | GWNS215-07  | HQ649491 | Canada        | Alberta          | Strickland Museum of Entomology, University of Alberta           |
| <i>Synaxis sp.</i>              | WFBM-07-0065    | GWNW065-07  | HQ649490 | United States | Idaho            | University of Idaho, W. F. Barr Entomological Collection         |
| <i>Synaxis sp.</i>              | WFBM-07-0067    | GWNW067-07  | HQ649489 | United States | Idaho            | University of Idaho, W. F. Barr Entomological Collection         |
| <i>Synchlora aerata</i>         | 08-JDWBC-1301   | LBCG1301-09 | HQ649502 | Canada        | British Columbia | Spencer Entomological Museum, UBC                                |
| <i>Synchlora aerata</i>         | CNCLPEP00033248 | GWNC249-07  | HQ649494 | Canada        | Alberta          | Canadian National Collection of Insects, Arachnids and Nematodes |

|                                |                |             |          |               |                  |                                                                  |
|--------------------------------|----------------|-------------|----------|---------------|------------------|------------------------------------------------------------------|
| <i>Synchlora aerata</i>        | CNCLEP00033249 | GWNC250-07  | HQ649493 | Canada        | British Columbia | Canadian National Collection of Insects, Arachnids and Nematodes |
| <i>Synchlora aerata</i>        | ENT002-002424  | GWNR364-07  | HQ649501 | Canada        | British Columbia | Royal British Columbia Museum                                    |
| <i>Synchlora aerata</i>        | ENT996-007609  | GWNR365-07  | HQ649500 | Canada        | British Columbia | Royal British Columbia Museum                                    |
| <i>Synchlora aerata</i>        | JD1910         | GWNS500-07  | HQ649496 | Canada        | British Columbia | Strickland Museum of Entomology, University of Alberta           |
| <i>Synchlora aerata</i>        | JECW-07-0123   | GWNJ123-07  | HQ649495 | United States | Washington       | James Entomological Collection, Washington State University      |
| <i>Synchlora aerata</i>        | UASM24893      | GWNS239-07  | HQ649497 | Canada        | Alberta          | Strickland Museum of Entomology, University of Alberta           |
| <i>Synchlora aerata</i>        | UASM34964      | GWNS238-07  | HQ649498 | Canada        | Alberta          | Strickland Museum of Entomology, University of Alberta           |
| <i>Synchlora aerata</i>        | UASM58440      | GWNS237-07  | HQ649499 | Canada        | Alberta          | Strickland Museum of Entomology, University of Alberta           |
| <i>Synchlora bistriaria</i>    | 08-JDWBC-2139  | LBCG2139-09 | HQ649539 | Canada        | British Columbia | Spencer Entomological Museum, UBC                                |
| <i>Synchlora bistriaria</i>    | 08-JDWBC-2140  | LBCG2140-09 | HQ649538 | Canada        | British Columbia | Spencer Entomological Museum, UBC                                |
| <i>Synchlora bistriaria</i>    | 08-JDWBC-2141  | LBCG2141-09 | HQ649537 | Canada        | British Columbia | Spencer Entomological Museum, UBC                                |
| <i>Synchlora bistriaria</i>    | 08-JDWBC-2142  | LBCG2142-09 | HQ649536 | Canada        | British Columbia | Spencer Entomological Museum, UBC                                |
| <i>Synchlora bistriaria</i>    | 08-JDWBC-2143  | LBCG2143-09 | HQ649535 | Canada        | British Columbia | Spencer Entomological Museum, UBC                                |
| <i>Synchlora bistriaria</i>    | 08-JDWBC-2144  | LBCG2144-09 | HQ649534 | Canada        | British Columbia | Spencer Entomological Museum, UBC                                |
| <i>Synchlora bistriaria</i>    | 08-JDWBC-2145  | LBCG2145-09 | HQ649533 | Canada        | British Columbia | Spencer Entomological Museum, UBC                                |
| <i>Synchlora bistriaria</i>    | 08-JDWBC-2146  | LBCG2146-09 | HQ649532 | Canada        | British Columbia | Spencer Entomological Museum, UBC                                |
| <i>Synchlora bistriaria</i>    | 08-JDWBC-2147  | LBCG2147-09 | HQ649531 | Canada        | British Columbia | Spencer Entomological Museum, UBC                                |
| <i>Synchlora bistriaria</i>    | 08-JDWBC-2148  | LBCG2148-09 | HQ649530 | Canada        | British Columbia | Spencer Entomological Museum, UBC                                |
| <i>Synchlora bistriaria</i>    | 08-JDWBC-2149  | LBCG2149-09 | HQ649529 | Canada        | British Columbia | Spencer Entomological Museum, UBC                                |
| <i>Synchlora bistriaria</i>    | 08-JDWBC-2150  | LBCG2150-09 | HQ649528 | Canada        | British Columbia | Spencer Entomological Museum, UBC                                |
| <i>Synchlora bistriaria</i>    | 08-JDWBC-2151  | LBCG2151-09 | HQ649527 | Canada        | British Columbia | Spencer Entomological Museum, UBC                                |
| <i>Synchlora bistriaria</i>    | 08-JDWBC-2598  | LBCG2598-09 | HQ649526 | Canada        | British Columbia | Spencer Entomological Museum, UBC                                |
| <i>Synchlora bistriaria</i>    | 08-JDWBC-2599  | LBCG2599-09 | HQ649525 | Canada        | British Columbia | Spencer Entomological Museum, UBC                                |
| <i>Synchlora bistriaria</i>    | 08-JDWBC-2600  | LBCG2600-09 | HQ649524 | Canada        | British Columbia | Spencer Entomological Museum, UBC                                |
| <i>Synchlora bistriaria</i>    | 08-JDWBC-2601  | LBCG2601-09 | HQ649523 | Canada        | British Columbia | Spencer Entomological Museum, UBC                                |
| <i>Synchlora bistriaria</i>    | 08-JDWBC-2602  | LBCG2602-09 | HQ649522 | Canada        | British Columbia | Spencer Entomological Museum, UBC                                |
| <i>Synchlora bistriaria</i>    | 08-JDWBC-2603  | LBCG2603-09 | HQ649521 | Canada        | British Columbia | Spencer Entomological Museum, UBC                                |
| <i>Synchlora bistriaria</i>    | 08-JDWBC-2604  | LBCG2604-09 | HQ649520 | Canada        | British Columbia | Spencer Entomological Museum, UBC                                |
| <i>Synchlora bistriaria</i>    | 08-JDWBC-2605  | LBCG2605-09 | HQ649519 | Canada        | British Columbia | Spencer Entomological Museum, UBC                                |
| <i>Synchlora bistriaria</i>    | 08-JDWBC-2606  | LBCG2606-09 | HQ649518 | Canada        | British Columbia | Spencer Entomological Museum, UBC                                |
| <i>Synchlora bistriaria</i>    | 08-JDWBC-2905  | LBCG2905-09 | HQ649517 | Canada        | British Columbia | Spencer Entomological Museum, UBC                                |
| <i>Synchlora bistriaria</i>    | 08-JDWBC-2906  | LBCG2906-09 | HQ649516 | Canada        | British Columbia | Spencer Entomological Museum, UBC                                |
| <i>Synchlora bistriaria</i>    | 08-JDWBC-2907  | LBCG2907-09 | HQ649515 | Canada        | British Columbia | Spencer Entomological Museum, UBC                                |
| <i>Synchlora bistriaria</i>    | 08-JDWBC-2908  | LBCG2908-09 | HQ649514 | Canada        | British Columbia | Spencer Entomological Museum, UBC                                |
| <i>Synchlora bistriaria</i>    | 08-JDWBC-2909  | LBCG2909-09 | HQ649513 | Canada        | British Columbia | Spencer Entomological Museum, UBC                                |
| <i>Synchlora bistriaria</i>    | 08-JDWBC-2910  | LBCG2910-09 | HQ649512 | Canada        | British Columbia | Spencer Entomological Museum, UBC                                |
| <i>Synchlora bistriaria</i>    | 08-JDWBC-3306  | LBCG3306-09 | HQ649511 | Canada        | British Columbia | Spencer Entomological Museum, UBC                                |
| <i>Synchlora bistriaria</i>    | 08-JDWBC-3307  | LBCG3307-09 | HQ649510 | Canada        | British Columbia | Spencer Entomological Museum, UBC                                |
| <i>Synchlora bistriaria</i>    | CNCLEP00033250 | GWNC251-07  | HQ649503 | Canada        | Alberta          | Canadian National Collection of Insects, Arachnids and Nematodes |
| <i>Synchlora bistriaria</i>    | ENT996-004236  | GWNR343-07  | HQ649507 | United States | Idaho            | Royal British Columbia Museum                                    |
| <i>Synchlora bistriaria</i>    | ENT996-004239  | GWNR344-07  | HQ649506 | United States | Idaho            | Royal British Columbia Museum                                    |
| <i>Synchlora bistriaria</i>    | JECW-07-0124   | GWNJ124-07  | HQ649505 | United States | Washington       | James Entomological Collection, Washington State University      |
| <i>Synchlora bistriaria</i>    | JECW-07-0125   | GWNJ125-07  | HQ649504 | United States | Washington       | James Entomological Collection, Washington State University      |
| <i>Synchlora bistriaria</i>    | UASM24892      | GWNS241-07  | HQ649508 | Canada        | Alberta          | Strickland Museum of Entomology, University of Alberta           |
| <i>Synchlora bistriaria</i>    | UASM41308      | GWNS240-07  | HQ649509 | Canada        | Alberta          | Strickland Museum of Entomology, University of Alberta           |
| <i>Tetraxis cachexiata</i>     | UASM10326      | GWNS216-07  | HQ649542 | Canada        | Alberta          | Strickland Museum of Entomology, University of Alberta           |
| <i>Tetraxis cachexiata</i>     | UASM41699      | GWNS217-07  | HQ649541 | Canada        | Alberta          | Strickland Museum of Entomology, University of Alberta           |
| <i>Tetraxis cachexiata</i>     | UASM57123      | GWNS218-07  | HQ649540 | Canada        | Alberta          | Strickland Museum of Entomology, University of Alberta           |
| <i>Tetraxis crocallata</i>     | UASM58367      | GWNS219-07  | HQ649545 | Canada        | Alberta          | Strickland Museum of Entomology, University of Alberta           |
| <i>Tetraxis crocallata</i>     | UASM7118       | GWNS221-07  | HQ649543 | Canada        | Alberta          | Strickland Museum of Entomology, University of Alberta           |
| <i>Tetraxis crocallata</i>     | UASM7387       | GWNS220-07  | HQ649544 | Canada        | Alberta          | Strickland Museum of Entomology, University of Alberta           |
| <i>Thallopaga hyperborea</i>   | 07-JDWBC-0007  | GWND007-07  | HQ649549 | Canada        | British Columbia | Royal British Columbia Museum                                    |
| <i>Thallopaga hyperborea</i>   | 07-JDWBC-0008  | GWND008-07  | HQ649548 | Canada        | British Columbia | Royal British Columbia Museum                                    |
| <i>Thallopaga hyperborea</i>   | 07-JDWBC-0011  | GWND011-07  | HQ649547 | Canada        | British Columbia | Royal British Columbia Museum                                    |
| <i>Thallopaga hyperborea</i>   | 07-JDWBC-0042  | GWND034-07  | HQ649546 | Canada        | British Columbia | Royal British Columbia Museum                                    |
| <i>Thallopaga hyperborea</i>   | ENT996-003967  | GWNR249-07  | HQ649553 | United States | Washington       | Royal British Columbia Museum                                    |
| <i>Thallopaga hyperborea</i>   | ENT996-003973  | GWNR248-07  | HQ649554 | Canada        | British Columbia | Royal British Columbia Museum                                    |
| <i>Thallopaga hyperborea</i>   | FFC-2007-0384  | GWNP174-07  | HQ649552 | Canada        | British Columbia | Royal British Columbia Museum                                    |
| <i>Thallopaga hyperborea</i>   | UASM59627      | GWNS161-07  | HQ649551 | Canada        | Alberta          | Pacific Forestry Centre, Canadian Forest Service                 |
| <i>Thallopaga hyperborea</i>   | UASM59728      | GWNS162-07  | HQ649550 | Canada        | British Columbia | Strickland Museum of Entomology, University of Alberta           |
| <i>Thallopaga taylorata</i>    | CGWC-0270      | LOWCD270-05 | HQ649559 | Canada        | British Columbia | Biodiversity Institute of Ontario                                |
| <i>Thallopaga taylorata</i>    | CGWC-2977      | LOWCD157-06 | HQ649556 | Canada        | British Columbia | Biodiversity Institute of Ontario                                |
| <i>Thallopaga taylorata</i>    | CGWC-4208      | LOWCE448-06 | HQ649555 | Canada        | British Columbia | Biodiversity Institute of Ontario                                |
| <i>Thallopaga taylorata</i>    | CNCLEP00033184 | GWNC185-07  | HQ649558 | Canada        | British Columbia | Canadian National Collection of Insects, Arachnids and Nematodes |
| <i>Thallopaga taylorata</i>    | CNCLEP00033185 | GWNC186-07  | HQ649557 | Canada        | British Columbia | Canadian National Collection of Insects, Arachnids and Nematodes |
| <i>Thera juniperata</i>        | CNCLEP00021784 | GWNC455-07  | HQ649562 | Canada        | Alberta          | Canadian National Collection of Insects, Arachnids and Nematodes |
| <i>Thera juniperata</i>        | CNCLEP00021785 | GWNC456-07  | HQ649560 | Canada        | British Columbia | Canadian National Collection of Insects, Arachnids and Nematodes |
| <i>Thera juniperata</i>        | CNCLEP00033403 | GWNC404-07  | HQ649561 | Canada        | Alberta          | Canadian National Collection of Insects, Arachnids and Nematodes |
| <i>Thera juniperata</i>        | UASM41476      | GWNS315-07  | HQ649565 | Canada        | Alberta          | Strickland Museum of Entomology, University of Alberta           |
| <i>Thera juniperata</i>        | UASM41477      | GWNS316-07  | HQ649564 | Canada        | Alberta          | Strickland Museum of Entomology, University of Alberta           |
| <i>Thera juniperata</i>        | UASM58423      | GWNS317-07  | HQ649563 | Canada        | Alberta          | Strickland Museum of Entomology, University of Alberta           |
| <i>Thera otisi</i>             | CNCLEP00033431 | GWNC432-07  | HQ649566 | Canada        | Yukon Territory  | Canadian National Collection of Insects, Arachnids and Nematodes |
| <i>Thera otisi</i>             | ENT996-007700  | GWNR635-07  | HQ649575 | Canada        | British Columbia | Royal British Columbia Museum                                    |
| <i>Thera otisi</i>             | ENT996-007701  | GWNR636-07  | HQ649574 | Canada        | British Columbia | Royal British Columbia Museum                                    |
| <i>Thera otisi</i>             | ENT996-007704  | GWNR637-07  | HQ649573 | Canada        | British Columbia | Royal British Columbia Museum                                    |
| <i>Thera otisi</i>             | FFC-2007-0295  | GWNP088-07  | HQ649570 | Canada        | British Columbia | Pacific Forestry Centre, Canadian Forest Service                 |
| <i>Thera otisi</i>             | UASM58195      | GWNS319-07  | HQ649571 | Canada        | Alberta          | Strickland Museum of Entomology, University of Alberta           |
| <i>Thera otisi</i>             | UASM58196      | GWNS318-07  | HQ649572 | Canada        | Alberta          | Strickland Museum of Entomology, University of Alberta           |
| <i>Thera otisi</i>             | UASM95844      | GWNS494-07  | HQ649569 | Canada        | Alberta          | Strickland Museum of Entomology, University of Alberta           |
| <i>Thera otisi</i>             | UASM95845      | GWNS495-07  | HQ649568 | Canada        | Alberta          | Strickland Museum of Entomology, University of Alberta           |
| <i>Thera otisi</i>             | UASM95849      | GWNS521-07  | HQ649567 | Canada        | Alberta          | Strickland Museum of Entomology, University of Alberta           |
| <i>Trichodezia albovittata</i> | ENT987-001244  | GWNR582-07  | HQ649579 | Canada        | British Columbia | Royal British Columbia Museum                                    |
| <i>Trichodezia albovittata</i> | ENT991-068287  | GWNR581-07  | HQ649580 | Canada        | British Columbia | Royal British Columbia Museum                                    |
| <i>Trichodezia albovittata</i> | HLC-20565      | LBCA565-05  | HQ649576 | Canada        | British Columbia | Biodiversity Institute of Ontario                                |
| <i>Trichodezia albovittata</i> | UASM58553      | GWNS404-07  | HQ649578 | Canada        | Alberta          | Strickland Museum of Entomology, University of Alberta           |
| <i>Trichodezia albovittata</i> | UASM7023       | GWNS405-07  | HQ649577 | Canada        | Alberta          | Strickland Museum of Entomology, University of Alberta           |
| <i>Triphosa haesitata</i>      | 07-JDWBC-0043  | GWND035-07  | HQ649582 | Canada        | British Columbia | Royal British Columbia Museum                                    |
| <i>Triphosa haesitata</i>      | 07-JDWBC-0048  | GWND040-07  | HQ649581 | Canada        | British Columbia | Royal British Columbia Museum                                    |
| <i>Triphosa haesitata</i>      | ENT996-004507  | GWNR525-07  | HQ649588 | United States | Washington       | Royal British Columbia Museum                                    |
| <i>Triphosa haesitata</i>      | ENT996-004514  | GWNR523-07  | HQ649590 | Canada        | British Columbia | Royal British Columbia Museum                                    |
| <i>Triphosa haesitata</i>      | ENT996-004519  | GWNR524-07  | HQ649589 | Canada        | British Columbia | Royal British Columbia Museum                                    |
| <i>Triphosa haesitata</i>      | ENT996-004885  | GWNR526-07  | HQ649587 | Canada        | British Columbia | Royal British Columbia Museum                                    |
| <i>Triphosa haesitata</i>      | FFC-2007-0246  | GWNP039-07  | HQ649585 | Canada        | British Columbia | Pacific Forestry Centre, Canadian Forest Service                 |
| <i>Triphosa haesitata</i>      | UASM59731      | GWNS321-07  | HQ649584 | Canada        | British Columbia | Strickland Museum of Entomology, University of Alberta           |
| <i>Triphosa haesitata</i>      | UASM59732      | GWNS322-07  | HQ649583 | Canada        | British Columbia | Strickland Museum of Entomology, University of Alberta           |
| <i>Triphosa haesitata</i>      | UASM7162       | GWNS320-07  | HQ649586 | Canada        | Alberta          | Strickland Museum of Entomology, University of Alberta           |
| <i>Venusia cambrica</i>        | ENT996-004860  | GWNR585-07  | HQ649595 | Canada        | British Columbia | Royal British Columbia Museum                                    |
| <i>Venusia cambrica</i>        | ENT996-004876  | GWNR587-07  | HQ649594 | Canada        | British Columbia | Royal British Columbia Museum                                    |
| <i>Venusia cambrica</i>        | HLC-21719      | LBCB779-05  | HQ649591 | Canada        | British Columbia | Biodiversity Institute of Ontario                                |
| <i>Venusia cambrica</i>        | UASM59832      | GWNS400-07  | HQ649593 | Canada        | British Columbia | Strickland Museum of Entomology, University of Alberta           |
| <i>Venusia cambrica</i>        | UASM59833      | GWNS401-07  | HQ649592 | Canada        | British Columbia | Strickland Museum of Entomology, University of Alberta           |
| <i>Venusia duodecimlineata</i> | FFC-2007-0335  | GWNP125-07  | HQ649596 | Canada        | British Columbia | Pacific Forestry Centre, Canadian Forest Service                 |
| <i>Venusia obsoleta</i>        | 07-JDWBC-0002  | GWND002-07  | HQ649604 | Canada        | British Columbia | Royal British Columbia Museum                                    |
| <i>Venusia obsoleta</i>        | 07-JDWBC-0003  | GWND003-07  | HQ649603 | Canada        | British Columbia | Royal British Columbia Museum                                    |
| <i>Venusia obsoleta</i>        | 07-JDWBC-0019  | GWND012-07  | HQ649602 | Canada        | British Columbia | Royal British Columbia Museum                                    |
| <i>Venusia obsoleta</i>        | 07-JDWBC-0035  | GWND027-07  | HQ649601 | Canada        | British Columbia | Royal British Columbia Museum                                    |
| <i>Venusia obsoleta</i>        | 07-JDWBC-0036  | GWND028-07  | HQ649600 | Canada        | British Columbia | Royal British Columbia Museum                                    |

|                                       |                    |             |          |               |                       |                                                                  |
|---------------------------------------|--------------------|-------------|----------|---------------|-----------------------|------------------------------------------------------------------|
| <i>Venusia obsoleta</i>               | 07-JDWBC-0045      | GWND037-07  | HQ649599 | Canada        | British Columbia      | Royal British Columbia Museum                                    |
| <i>Venusia obsoleta</i>               | CNCLPEP00034078    | GWNC516-07  | HQ649598 | Canada        | British Columbia      | Canadian National Collection of Insects, Arachnids and Nematodes |
| <i>Venusia obsoleta</i>               | CNCLPEP00034079    | GWNC517-07  | HQ649597 | Canada        | British Columbia      | Canadian National Collection of Insects, Arachnids and Nematodes |
| <i>Venusia obsoleta</i>               | ENT996-004921      | GWNR590-07  | HQ649605 | Canada        | British Columbia      | Royal British Columbia Museum                                    |
| <i>Venusia pearsalli</i>              | 08-JDWBC-0010      | LBCG010-08  | HQ649617 | Canada        | British Columbia      | Spencer Entomological Museum, UBC                                |
| <i>Venusia pearsalli</i>              | 08-JDWBC-0011      | LBCG011-08  | HQ649616 | Canada        | British Columbia      | Spencer Entomological Museum, UBC                                |
| <i>Venusia pearsalli</i>              | 08-JDWBC-0012      | LBCG012-08  | HQ649615 | Canada        | British Columbia      | Spencer Entomological Museum, UBC                                |
| <i>Venusia pearsalli</i>              | 08-JDWBC-0277      | LBCG277-08  | HQ649618 | Canada        | British Columbia      | Spencer Entomological Museum, UBC                                |
| <i>Venusia pearsalli</i>              | 08-JDWBC-0278      | LBCG278-08  | HQ649619 | Canada        | British Columbia      | Spencer Entomological Museum, UBC                                |
| <i>Venusia pearsalli</i>              | 08-JDWBC-0282      | LBCG282-08  | HQ649620 | Canada        | British Columbia      | Spencer Entomological Museum, UBC                                |
| <i>Venusia pearsalli</i>              | 08-JDWBC-0283      | LBCG283-08  | HQ649621 | Canada        | British Columbia      | Spencer Entomological Museum, UBC                                |
| <i>Venusia pearsalli</i>              | 08-JDWBC-0284      | LBCG284-08  | HQ649622 | Canada        | British Columbia      | Spencer Entomological Museum, UBC                                |
| <i>Venusia pearsalli</i>              | 08-JDWBC-0321      | LBCG321-08  | HQ649614 | Canada        | British Columbia      | Spencer Entomological Museum, UBC                                |
| <i>Venusia pearsalli</i>              | 08-JDWBC-0328      | LBCG328-08  | HQ649613 | Canada        | British Columbia      | Spencer Entomological Museum, UBC                                |
| <i>Venusia pearsalli</i>              | 08-JDWBC-0329      | LBCG329-08  | HQ649612 | Canada        | British Columbia      | Spencer Entomological Museum, UBC                                |
| <i>Venusia pearsalli</i>              | 08-JDWBC-0330      | LBCG330-08  | HQ649611 | Canada        | British Columbia      | Spencer Entomological Museum, UBC                                |
| <i>Venusia pearsalli</i>              | CNCLPEP00033394    | GWNC395-07  | HQ649607 | Canada        | Alberta               | Canadian National Collection of Insects, Arachnids and Nematodes |
| <i>Venusia pearsalli</i>              | CNCLPEP00033395    | GWNC396-07  | HQ649606 | Canada        | British Columbia      | Canadian National Collection of Insects, Arachnids and Nematodes |
| <i>Venusia pearsalli</i>              | ENT991-003579      | GWNR588-07  | HQ649623 | Canada        | British Columbia      | Royal British Columbia Museum                                    |
| <i>Venusia pearsalli</i>              | JD0038             | GWNS403-07  | HQ649609 | Canada        | Alberta               | Strickland Museum of Entomology, University of Alberta           |
| <i>Venusia pearsalli</i>              | NFRC-P-2007-100086 | GWNN086-07  | HQ649608 | Canada        | Alberta               | Northern Forestry Centre, Canadian Forest Service                |
| <i>Venusia pearsalli</i>              | UASM95834          | GWNS402-07  | HQ649610 | Canada        | Alberta               | Strickland Museum of Entomology, University of Alberta           |
| <i>Xanthorhoe abrasaria</i>           | 08-JDWBC-0978      | LBCG978-09  | HQ649630 | Canada        | British Columbia      | Spencer Entomological Museum, UBC                                |
| <i>Xanthorhoe abrasaria</i>           | 08-JDWBC-1112      | LBCG1112-09 | HQ649629 | Canada        | British Columbia      | Spencer Entomological Museum, UBC                                |
| <i>Xanthorhoe abrasaria</i>           | 08-JDWBC-1809      | LBCG1809-09 | HQ649634 | Canada        | British Columbia      | Spencer Entomological Museum, UBC                                |
| <i>Xanthorhoe abrasaria</i>           | 08-JDWBC-1812      | LBCG1812-09 | HQ649633 | Canada        | British Columbia      | Spencer Entomological Museum, UBC                                |
| <i>Xanthorhoe abrasaria</i>           | CBC1059            | GWNS370-07  | HQ649624 | Canada        | Alberta               | Strickland Museum of Entomology, University of Alberta           |
| <i>Xanthorhoe abrasaria</i>           | ENT002-001719      | GWNR551-07  | HQ649631 | Canada        | British Columbia      | Royal British Columbia Museum                                    |
| <i>Xanthorhoe abrasaria</i>           | ENT991-003776      | GWNR571-07  | HQ649628 | Canada        | British Columbia      | Royal British Columbia Museum                                    |
| <i>Xanthorhoe abrasaria</i>           | ENT991-006399      | GWNR575-07  | HQ649636 | Canada        | British Columbia      | Royal British Columbia Museum                                    |
| <i>Xanthorhoe abrasaria</i>           | ENT991-006405      | GWNR576-07  | HQ649635 | Canada        | British Columbia      | Royal British Columbia Museum                                    |
| <i>Xanthorhoe abrasaria</i>           | ENT996-004628      | GWNR550-07  | HQ649632 | United States | Washington            | Royal British Columbia Museum                                    |
| <i>Xanthorhoe abrasaria</i>           | UASM24174          | GWNS369-07  | HQ649625 | Canada        | Alberta               | Strickland Museum of Entomology, University of Alberta           |
| <i>Xanthorhoe abrasaria</i>           | UASM95862          | GWNS523-07  | HQ649626 | Canada        | Alberta               | Strickland Museum of Entomology, University of Alberta           |
| <i>Xanthorhoe abrasaria</i>           | UASM95865          | GWNS522-07  | HQ649627 | Canada        | Alberta               | Strickland Museum of Entomology, University of Alberta           |
| <i>Xanthorhoe algidata</i>            | CNCLPEP00033414    | GWNC415-07  | HQ649637 | Canada        | Alberta               | Canadian National Collection of Insects, Arachnids and Nematodes |
| <i>Xanthorhoe algidata</i>            | UASM58362          | GWNS313-07  | HQ649639 | Canada        | Alberta               | Strickland Museum of Entomology, University of Alberta           |
| <i>Xanthorhoe algidata</i>            | UASM95826          | GWNS378-07  | HQ649638 | Canada        | Alberta               | Strickland Museum of Entomology, University of Alberta           |
| <i>Xanthorhoe alticolata</i>          | 08-JDWBC-0773      | LBCG773-09  | HQ649644 | Canada        | British Columbia      | Spencer Entomological Museum, UBC                                |
| <i>Xanthorhoe alticolata</i>          | CBC1097_duplicate  | GWNS527-07  | HQ649642 | Canada        | Alberta               | Strickland Museum of Entomology, University of Alberta           |
| <i>Xanthorhoe alticolata</i>          | CNCLPEP00034071    | GWNC509-07  | HQ649640 | Canada        | Yukon Territory       | Canadian National Collection of Insects, Arachnids and Nematodes |
| <i>Xanthorhoe alticolata</i>          | ENT991-003732      | GWNR572-07  | HQ649643 | Canada        | British Columbia      | Royal British Columbia Museum                                    |
| <i>Xanthorhoe alticolata</i>          | PFC-2007-0318      | GWNP108-07  | HQ649641 | Canada        | British Columbia      | Pacific Forestry Centre, Canadian Forest Service                 |
| <i>Xanthorhoe baffinensis</i>         | CNCLPEP00033411    | GWNC412-07  | HQ649646 | Canada        | Alberta               | Canadian National Collection of Insects, Arachnids and Nematodes |
| <i>Xanthorhoe baffinensis</i>         | CNCLPEP00034065    | GWNC503-07  | HQ649645 | Canada        | Northwest Territories | Canadian National Collection of Insects, Arachnids and Nematodes |
| <i>Xanthorhoe borealis</i>            | CNCLPEP00034180    | GWNC618-07  | HQ649647 | United States | Alaska                | Canadian National Collection of Insects, Arachnids and Nematodes |
| <i>Xanthorhoe clarkaeata</i>          | CNCLPEP00034072    | GWNC510-07  | HQ649649 | Canada        | British Columbia      | Canadian National Collection of Insects, Arachnids and Nematodes |
| <i>Xanthorhoe clarkaeata</i>          | CNCLPEP00034073    | GWNC511-07  | HQ649648 | Canada        | British Columbia      | Canadian National Collection of Insects, Arachnids and Nematodes |
| <i>Xanthorhoe decoloraria</i>         | 08-JDWBC-1810      | LBCG1810-09 | HQ649655 | Canada        | British Columbia      | Spencer Entomological Museum, UBC                                |
| <i>Xanthorhoe decoloraria</i>         | 08-JDWBC-1811      | LBCG1811-09 | HQ649654 | Canada        | British Columbia      | Spencer Entomological Museum, UBC                                |
| <i>Xanthorhoe decoloraria</i>         | CNCLPEP00033415    | GWNC416-07  | HQ649650 | Canada        | Alberta               | Canadian National Collection of Insects, Arachnids and Nematodes |
| <i>Xanthorhoe decoloraria</i>         | ENT002-001722      | GWNR570-07  | HQ649653 | Canada        | British Columbia      | Royal British Columbia Museum                                    |
| <i>Xanthorhoe decoloraria</i>         | NFRC-P-2007-100074 | GWNN074-07  | HQ649651 | Canada        | Alberta               | Northern Forestry Centre, Canadian Forest Service                |
| <i>Xanthorhoe decoloraria</i>         | UASM7327           | GWNS381-07  | HQ649652 | Canada        | Alberta               | Strickland Museum of Entomology, University of Alberta           |
| <i>Xanthorhoe defensaria</i>          | 08-JDWBC-0006      | LBCG006-08  | HQ649662 | Canada        | British Columbia      | Spencer Entomological Museum, UBC                                |
| <i>Xanthorhoe defensaria</i>          | JECW-07-0155       | GWNJ155-07  | HQ649658 | United States | Washington            | James Entomological Collection, Washington State University      |
| <i>Xanthorhoe defensaria</i>          | JECW-07-0156       | GWNJ156-07  | HQ649657 | United States | Washington            | James Entomological Collection, Washington State University      |
| <i>Xanthorhoe defensaria</i>          | JECW-07-0157       | GWNJ157-07  | HQ649656 | United States | Idaho                 | James Entomological Collection, Washington State University      |
| <i>Xanthorhoe defensaria</i>          | PFC-2007-0316      | GWNP106-07  | HQ649661 | Canada        | British Columbia      | Pacific Forestry Centre, Canadian Forest Service                 |
| <i>Xanthorhoe defensaria</i>          | PFC-2007-0317      | GWNP107-07  | HQ649660 | Canada        | British Columbia      | Pacific Forestry Centre, Canadian Forest Service                 |
| <i>Xanthorhoe defensaria</i>          | PFC-2007-0319      | GWNP109-07  | HQ649659 | Canada        | British Columbia      | Pacific Forestry Centre, Canadian Forest Service                 |
| <i>Xanthorhoe ferrugata</i>           | CNCLPEP00034146    | GWNC584-07  | HQ649663 | Canada        | British Columbia      | Canadian National Collection of Insects, Arachnids and Nematodes |
| <i>Xanthorhoe ferrugata</i>           | ENT002-001721      | GWNR561-07  | HQ649668 | Canada        | British Columbia      | Royal British Columbia Museum                                    |
| <i>Xanthorhoe ferrugata</i>           | JD0240             | GWNS555-07  | HQ649667 | Canada        | Alberta               | Strickland Museum of Entomology, University of Alberta           |
| <i>Xanthorhoe ferrugata</i>           | UASM7019           | GWNS383-07  | HQ649664 | Canada        | Alberta               | Strickland Museum of Entomology, University of Alberta           |
| <i>Xanthorhoe ferrugata</i>           | UASM7371           | GWNS382-07  | HQ649665 | Canada        | Alberta               | Strickland Museum of Entomology, University of Alberta           |
| <i>Xanthorhoe ferrugata</i>           | UASM78460          | GWNS576-07  | HQ649666 | Canada        | Alberta               | Strickland Museum of Entomology, University of Alberta           |
| <i>Xanthorhoe fossaria</i>            | CNCLPEP00033413    | GWNC414-07  | HQ649672 | Canada        | Alberta               | Canadian National Collection of Insects, Arachnids and Nematodes |
| <i>Xanthorhoe fossaria</i>            | CNCLPEP00034069    | GWNC507-07  | HQ649671 | Canada        | Yukon Territory       | Canadian National Collection of Insects, Arachnids and Nematodes |
| <i>Xanthorhoe fossaria</i>            | CNCLPEP00034070    | GWNC508-07  | HQ649670 | Canada        | British Columbia      | Canadian National Collection of Insects, Arachnids and Nematodes |
| <i>Xanthorhoe fossaria</i>            | CNCLPEP00034156    | GWNC594-07  | HQ649669 | Canada        | British Columbia      | Canadian National Collection of Insects, Arachnids and Nematodes |
| <i>Xanthorhoe fossaria</i>            | ENT002-002427      | GWNR564-07  | HQ649678 | Canada        | British Columbia      | Royal British Columbia Museum                                    |
| <i>Xanthorhoe fossaria</i>            | ENT991-162872      | GWNR574-07  | HQ649675 | Canada        | British Columbia      | Royal British Columbia Museum                                    |
| <i>Xanthorhoe fossaria</i>            | ENT991-163197      | GWNR573-07  | HQ649676 | Canada        | British Columbia      | Royal British Columbia Museum                                    |
| <i>Xanthorhoe fossaria</i>            | ENT992-020272      | GWNR562-07  | HQ649679 | Canada        | British Columbia      | Royal British Columbia Museum                                    |
| <i>Xanthorhoe fossaria</i>            | ENT996-004666      | GWNR565-07  | HQ649677 | Canada        | Yukon Territory       | Royal British Columbia Museum                                    |
| <i>Xanthorhoe fossaria</i>            | NFRC-P-2007-100073 | GWNN073-07  | HQ649673 | Canada        | Alberta               | Northern Forestry Centre, Canadian Forest Service                |
| <i>Xanthorhoe fossaria</i>            | UASM95828          | GWNS380-07  | HQ649674 | Canada        | Alberta               | Strickland Museum of Entomology, University of Alberta           |
| <i>Xanthorhoe iduata</i>              | CNCLPEP00034060    | GWNC498-07  | HQ649680 | Canada        | British Columbia      | Canadian National Collection of Insects, Arachnids and Nematodes |
| <i>Xanthorhoe iduata</i>              | UASM95822          | GWNS373-07  | HQ649681 | Canada        | Alberta               | Strickland Museum of Entomology, University of Alberta           |
| <i>Xanthorhoe incurcata laggenata</i> | UASM99151          | MMNA031-08  | HQ649684 | Canada        | Alberta               | Strickland Museum of Entomology, University of Alberta           |
| <i>Xanthorhoe incurcata laggenata</i> | UASM99152          | MMNA032-08  | HQ649683 | Canada        | Alberta               | Strickland Museum of Entomology, University of Alberta           |
| <i>Xanthorhoe incurcata laggenata</i> | UASM99173          | MMNA034-08  | HQ649682 | Canada        | Alberta               | Strickland Museum of Entomology, University of Alberta           |
| <i>Xanthorhoe labradorensis</i>       | CNCLPEP00033410    | GWNC411-07  | HQ649686 | Canada        | Alberta               | Canadian National Collection of Insects, Arachnids and Nematodes |
| <i>Xanthorhoe labradorensis</i>       | CNCLPEP00034056    | GWNC494-07  | HQ649685 | Canada        | Yukon Territory       | Canadian National Collection of Insects, Arachnids and Nematodes |
| <i>Xanthorhoe labradorensis</i>       | UASM41705          | GWNS367-07  | HQ649688 | Canada        | Alberta               | Strickland Museum of Entomology, University of Alberta           |
| <i>Xanthorhoe labradorensis</i>       | UASM7018           | GWNS368-07  | HQ649687 | Canada        | Alberta               | Strickland Museum of Entomology, University of Alberta           |
| <i>Xanthorhoe labradorensis</i>       | UASM78375          | GWNS579-07  | HQ649689 | Canada        | Alberta               | Strickland Museum of Entomology, University of Alberta           |
| <i>Xanthorhoe lacustrata</i>          | CNCLPEP00034145    | GWNC583-07  | HQ649691 | Canada        | Alberta               | Canadian National Collection of Insects, Arachnids and Nematodes |
| <i>Xanthorhoe lacustrata</i>          | CNCLPEP00034147    | GWNC585-07  | HQ649690 | Canada        | Alberta               | Canadian National Collection of Insects, Arachnids and Nematodes |
| <i>Xanthorhoe lacustrata</i>          | ENT002-001716      | GWNR568-07  | HQ649694 | Canada        | British Columbia      | Royal British Columbia Museum                                    |
| <i>Xanthorhoe lacustrata</i>          | ENT002-001717      | GWNR567-07  | HQ649695 | Canada        | British Columbia      | Royal British Columbia Museum                                    |
| <i>Xanthorhoe lacustrata</i>          | ENT002-001718      | GWNR566-07  | HQ649696 | Canada        | British Columbia      | Royal British Columbia Museum                                    |
| <i>Xanthorhoe lacustrata</i>          | NFRC-P-2007-100077 | GWNN077-07  | HQ649692 | Canada        | Alberta               | Northern Forestry Centre, Canadian Forest Service                |
| <i>Xanthorhoe lacustrata</i>          | UASM7020           | GWNS384-07  | HQ649693 | Canada        | Alberta               | Strickland Museum of Entomology, University of Alberta           |
| <i>Xanthorhoe macdunnoughi</i>        | 08-JDWBC-0747      | LBCG747-09  | HQ649715 | Canada        | British Columbia      | Spencer Entomological Museum, UBC                                |
| <i>Xanthorhoe macdunnoughi</i>        | 08-JDWBC-0748      | LBCG748-09  | HQ649714 | Canada        | British Columbia      | Spencer Entomological Museum, UBC                                |
| <i>Xanthorhoe macdunnoughi</i>        | 08-JDWBC-0775      | LBCG775-09  | HQ649713 | Canada        | British Columbia      | Spencer Entomological Museum, UBC                                |
| <i>Xanthorhoe macdunnoughi</i>        | 08-JDWBC-0799      | LBCG799-09  | HQ649712 | Canada        | British Columbia      | Spencer Entomological Museum, UBC                                |
| <i>Xanthorhoe macdunnoughi</i>        | 08-JDWBC-0977      | LBCG977-09  | HQ649711 | Canada        | British Columbia      | Spencer Entomological Museum, UBC                                |
| <i>Xanthorhoe macdunnoughi</i>        | 08-JDWBC-1009      | LBCG1009-09 | HQ649710 | Canada        | British Columbia      | Spencer Entomological Museum, UBC                                |
| <i>Xanthorhoe macdunnoughi</i>        | 08-JDWBC-1013      | LBCG1013-09 | HQ649709 | Canada        | British Columbia      | Spencer Entomological Museum, UBC                                |
| <i>Xanthorhoe macdunnoughi</i>        | 08-JDWBC-1021      | LBCG1021-09 | HQ649708 | Canada        | British Columbia      | Spencer Entomological Museum, UBC                                |
| <i>Xanthorhoe macdunnoughi</i>        | 08-JDWBC-1022      | LBCG1022-09 | HQ649707 | Canada        | British Columbia      | Spencer Entomological Museum, UBC                                |
| <i>Xanthorhoe macdunnoughi</i>        | 08-JDWBC-1023      | LBCG1023-09 | HQ649706 | Canada        | British Columbia      | Spencer Entomological Museum, UBC                                |
| <i>Xanthorhoe macdunnoughi</i>        | 08-JDWBC-1024      | LBCG1024-09 | HQ649705 | Canada        | British Columbia      | Spencer Entomological Museum, UBC                                |
| <i>Xanthorhoe macdunnoughi</i>        | 08-JDWBC-1025      | LBCG1025-09 | HQ649704 | Canada        | British Columbia      | Spencer Entomological Museum, UBC                                |

|                                 |                |             |          |               |                  |                                                                  |
|---------------------------------|----------------|-------------|----------|---------------|------------------|------------------------------------------------------------------|
| <i>Xanthorhoe macdunnoughi</i>  | 08-JDWBC-1026  | LBCG1026-09 | HQ649703 | Canada        | British Columbia | Spencer Entomological Museum, UBC                                |
| <i>Xanthorhoe macdunnoughi</i>  | CNCLEP00034061 | GWNC499-07  | HQ649698 | Canada        | Alberta          | Canadian National Collection of Insects, Arachnids and Nematodes |
| <i>Xanthorhoe macdunnoughi</i>  | CNCLEP00034062 | GWNC500-07  | HQ649697 | Canada        | British Columbia | Canadian National Collection of Insects, Arachnids and Nematodes |
| <i>Xanthorhoe macdunnoughi</i>  | ENT002-001720  | GWNR563-07  | HQ649702 | Canada        | British Columbia | Royal British Columbia Museum                                    |
| <i>Xanthorhoe macdunnoughi</i>  | ENT996-004579  | GWNR488-07  | HQ649701 | Canada        | British Columbia | Royal British Columbia Museum                                    |
| <i>Xanthorhoe macdunnoughi</i>  | UASM78495      | GWNS377-07  | HQ649700 | Canada        | Alberta          | Strickland Museum of Entomology, University of Alberta           |
| <i>Xanthorhoe macdunnoughi</i>  | UASM95827      | GWNS379-07  | HQ649699 | Canada        | Alberta          | Strickland Museum of Entomology, University of Alberta           |
| <i>Xanthorhoe packardata</i>    | CNCLEP00034152 | GWNC590-07  | HQ649716 | Canada        | Alberta          | Canadian National Collection of Insects, Arachnids and Nematodes |
| <i>Xanthorhoe pontiaria</i>     | CNCLEP00034068 | GWNC506-07  | HQ649717 | Canada        | British Columbia | Canadian National Collection of Insects, Arachnids and Nematodes |
| <i>Xanthorhoe ramaria</i>       | CNCLEP00033412 | GWNC413-07  | HQ649718 | Canada        | Alberta          | Canadian National Collection of Insects, Arachnids and Nematodes |
| <i>Xanthorhoe ramaria</i>       | JD0844         | GWNS556-07  | HQ649723 | Canada        | Alberta          | Strickland Museum of Entomology, University of Alberta           |
| <i>Xanthorhoe ramaria</i>       | UASM53057      | GWNS372-07  | HQ649721 | Canada        | Alberta          | Strickland Museum of Entomology, University of Alberta           |
| <i>Xanthorhoe ramaria</i>       | UASM59273      | GWNS376-07  | HQ649722 | Canada        | Yukon Territory  | Strickland Museum of Entomology, University of Alberta           |
| <i>Xanthorhoe ramaria</i>       | UASM95823      | GWNS374-07  | HQ649720 | Canada        | Alberta          | Strickland Museum of Entomology, University of Alberta           |
| <i>Xanthorhoe ramaria</i>       | UASM95825      | GWNS375-07  | HQ649719 | Canada        | Alberta          | Strickland Museum of Entomology, University of Alberta           |
| <i>Xanthorhoe ramaria</i>       | UASM95872      | GWNS543-07  | HQ649725 | Canada        | Alberta          | Strickland Museum of Entomology, University of Alberta           |
| <i>Xanthorhoe ramaria</i>       | UASM95873      | GWNS544-07  | HQ649724 | Canada        | Alberta          | Strickland Museum of Entomology, University of Alberta           |
| <i>Xanthorhoe ramaria</i>       | CNCLEP00034163 | GWNC601-07  | HQ649726 | Canada        | Alberta          | Canadian National Collection of Insects, Arachnids and Nematodes |
| <i>Xanthotype sospeta</i>       | UASM41955      | GWNS131-07  | HQ649729 | Canada        | Alberta          | Strickland Museum of Entomology, University of Alberta           |
| <i>Xanthotype sospeta</i>       | UASM43228      | GWNS133-07  | HQ649727 | Canada        | Alberta          | Strickland Museum of Entomology, University of Alberta           |
| <i>Xanthotype sospeta</i>       | UASM43230      | GWNS132-07  | HQ649728 | Canada        | Alberta          | Strickland Museum of Entomology, University of Alberta           |
| <i>Xanthotype urticaria</i>     | CNCLEP00033364 | GWNC365-07  | HQ649730 | Canada        | Alberta          | Canadian National Collection of Insects, Arachnids and Nematodes |
| <i>Xanthotype urticaria</i>     | ENT002-002415  | GWNR198-07  | HQ649733 | Canada        | British Columbia | Royal British Columbia Museum                                    |
| <i>Xanthotype urticaria</i>     | ENT002-002416  | GWNR199-07  | HQ649732 | Canada        | British Columbia | Royal British Columbia Museum                                    |
| <i>Xanthotype urticaria</i>     | UASM7063       | GWNS129-07  | HQ649731 | Canada        | Alberta          | Strickland Museum of Entomology, University of Alberta           |
| <i>Zenophleps alpinata</i>      | CBCC1251       | GWNS553-07  | HQ649745 | Canada        | Alberta          | Strickland Museum of Entomology, University of Alberta           |
| <i>Zenophleps alpinata</i>      | CNCLEP00033321 | GWNC322-07  | HQ649737 | Canada        | Alberta          | Canadian National Collection of Insects, Arachnids and Nematodes |
| <i>Zenophleps alpinata</i>      | CNCLEP00033322 | GWNC323-07  | HQ649736 | Canada        | Alberta          | Canadian National Collection of Insects, Arachnids and Nematodes |
| <i>Zenophleps alpinata</i>      | CNCLEP00033323 | GWNC324-07  | HQ649735 | Canada        | Alberta          | Canadian National Collection of Insects, Arachnids and Nematodes |
| <i>Zenophleps alpinata</i>      | CNCLEP00033324 | GWNC325-07  | HQ649734 | Canada        | Alberta          | Canadian National Collection of Insects, Arachnids and Nematodes |
| <i>Zenophleps alpinata</i>      | ENT002-001737  | GWNR579-07  | HQ649746 | Canada        | British Columbia | Royal British Columbia Museum                                    |
| <i>Zenophleps alpinata</i>      | JD1790         | GWNS504-07  | HQ649738 | Canada        | British Columbia | Strickland Museum of Entomology, University of Alberta           |
| <i>Zenophleps alpinata</i>      | JECW-07-0165   | GWNJ165-07  | HQ649744 | United States | Washington       | James Entomological Collection, Washington State University      |
| <i>Zenophleps alpinata</i>      | JECW-07-0166   | GWNJ166-07  | HQ649743 | United States | Washington       | James Entomological Collection, Washington State University      |
| <i>Zenophleps alpinata</i>      | UASM41726      | GWNS396-07  | HQ649739 | Canada        | Alberta          | Strickland Museum of Entomology, University of Alberta           |
| <i>Zenophleps alpinata</i>      | UASM57939      | GWNS395-07  | HQ649740 | Canada        | Alberta          | Strickland Museum of Entomology, University of Alberta           |
| <i>Zenophleps alpinata</i>      | UASM58612      | GWNS394-07  | HQ649741 | Canada        | Alberta          | Strickland Museum of Entomology, University of Alberta           |
| <i>Zenophleps alpinata</i>      | UASM58856      | GWNS393-07  | HQ649742 | Canada        | Alberta          | Strickland Museum of Entomology, University of Alberta           |
| <i>Zenophleps lignicolorata</i> | PFC-2007-0325  | GWNP115-07  | HQ649747 | Canada        | British Columbia | Pacific Forestry Centre, Canadian Forest Service                 |
